# Supplementary material
Source: publisher figshare collection journal article supplement (https://acs.figshare.com/ndownloader/files/4670305)
Supplement: Supplementary file 1 [file 4670305]

## Supporting Information for

### Substrate-Dependent Stereochemical Course of the (Z)-13 Desaturation Catalyzed by the Processionary Moth Multifunctional Desaturase

José-Luis Abad,\* Francisco Camps, Gemma Fabriàs

Departamento de Química Orgánica Biológica, Instituto de Investigaciones Químicas y Ambientales de Barcelona, Consejo Superior de Investigaciones Científicas, Jordi Girona 18-26, 08034-Barcelona, Spain.

\*Corresponding author, email: jlaqob@iiqab.csic.es

## Experimental Section

**General Methods.** All commercially available chemicals and solvents were used without further purification as supplied with the following exceptions: dimethylformamide (DMF) and hexamethylphosphotriamide (HMPA) were distilled and kept over molecular sieves (3Å), diethyl ether and tetrahydrofuran (THF) were distilled over Na/benzophenone under inert atmosphere. All moisture- and air-sensitive reactions were carried out under a dry nitrogen or argon atmosphere with dry reagents and solvents in flame-dried round bottom flasks. All the organic extracts obtained from workup of crude reaction mixtures were dried over MgSO<sub>4</sub>, filtered and concentrated with a rotatory evaporator under reduced pressure. *C. antarctica* lipase type B (CALB) was supplied as an immobilized preparation on a macroporous acrylic resin. Adsorption of *T. lanuginosus* lipase onto polypropylene support (EP100) was carried out following the methodology described by Gitlesen et al.<sup>1</sup> The activity of both immobilized lipase preparations was measured by use of the acylation of 1-dodecanol in organic media.<sup>2</sup> Purification procedures were carried out by flash chromatography on silica gel (230-400 mesh) using compressed air, and most of the products were obtained as oils. Melting points (mp) were determined in soft glass capillary tubes and are uncorrected. Elemental analyses were conventional combustion analyses without discrimination between hydrogen and deuterium contents. LiAlD<sub>4</sub> and D<sub>2</sub> Deuterium content were 98% and 99.8%, respectively. Analytical thin layer chromatography (TLC) was performed using 0.2 mm silica gel coated Kieselgel 60 F<sub>254</sub> plates. Visualization of UV-inactive materials was accomplished by soaking the TLC plates in ethanolic solution of anisaldehyde and sulfuric acid (v/v/v, 96:2:2) or in ethanolic solution of phosphomolybdic acid (5%). Unless otherwise stated, most of <sup>1</sup>H NMR spectra were acquired at 500 MHz, and <sup>13</sup>C NMR spectra, at 125 MHz in freshly neutralized CDCl<sub>3</sub> solutions, and chemical shifts are quoted in parts per million (ppm) on the δ scale downfield from Si(CH<sub>3</sub>)<sub>4</sub> for <sup>1</sup>H, and CDCl<sub>3</sub> for <sup>13</sup>C. GC/MS analysis was performed by chemical ionization (CI) using methane as ionization gas. All IR spectra were run in film. Optical rotations were measured at 25° in CHCl<sub>3</sub> solution at the specified concentration

(g/100 mL). Enantiomeric and diastereomeric excesses (ee and de) values were calculated by HPLC or NMR analysis of the corresponding (*R*)-(-)-MPA or (*R*)-(-)-9-AMA diastereomeric esters.

**BrCH<sub>2</sub>(CH<sub>2</sub>)<sub>4</sub>CH<sub>2</sub>OMOM** was prepared from 1,6-hexandiol in two steps on a multigram scale according a previously reported method.<sup>3</sup>

**Preparation of alkynol 2.** To a mixture of 3-butyne-1-ol (5.6 g, 80 mmol), 80 ml of dry HMPA and 100 ml of THF was added dropwise a solution of butyllithium (2.4 M) in hexanes (75 mL, 180 mmol) at -15° C. The resulting pale red mixture was stirred for 10 min and a solution of BrCH<sub>2</sub>(CH<sub>2</sub>)<sub>4</sub>CH<sub>2</sub>OMOM (9 g, 40 mmol) in 20 mL of THF was added dropwise at that temperature. Stirring was continued for 4 h at 0°C and then allowed to warm up to ambient temperature and stirred for another 12 h. The reaction mixture was poured into satd NaHCO<sub>3</sub> aqueous solution (200 ml) and extracted with hexane (3 x 150 ml). Solvent was evaporated and the residue purified by flash chromatography on silica gel using a gradient hexane/MTBE (0-35%) to afford 6.7 g of the expected alkynol **2** in 78% yield.

**11,13-dioxatetradec-4-yn-1-ol (2).** IR 3420, 2935, 2860, 1725, 1460, 1440, 1145, 1110, 1045, 920 cm<sup>-1</sup>; <sup>1</sup>H NMR δ 4.62 (s, 2H), 3.68 (t, *J* = 6.0 Hz, 2H), 3.52 (t, *J* = 6.5 Hz, 2H), 3.36 (s, 3H), 2.43 (m, 2H), 2.17 (m, 2H), 2.03 (bb, 1H), 1.60 (m, 2H), 1.51 (m, 2H), 1.45-1.34 (ca, 4H); <sup>13</sup>C NMR δ 96.3 (CH<sub>2</sub>), 82.4 (C), 76.4 (C), 67.7 (CH<sub>2</sub>), 61.3 (CH<sub>2</sub>), 55.0 (CH<sub>3</sub>), 29.5 (CH<sub>2</sub>), 28.8 (CH<sub>2</sub>), 28.6 (CH<sub>2</sub>), 25.7 (CH<sub>2</sub>), 23.1 (CH<sub>2</sub>), 18.6 (CH<sub>2</sub>); MS *m/z* 183 (100, M<sup>+</sup>-CH<sub>3</sub>O), 165 (55), 151 (20), 135 (30), 121 (35), 109 (50), 97 (50), 83 (60); Anal. Calcd for C<sub>12</sub>H<sub>22</sub>O<sub>3</sub>: C, 67.26; H, 10.35. Found: C, 67.25; H, 10.32.

**Deuteration of alkynol 2.** To a mixture of 6.45 g (30 mmol) of alkynol **2** and 0.93 g (1 mmol) of Wilkinson catalyst,<sup>4</sup> 200 mL of degassed benzene was added under argon atmosphere to afford a reddish solution. The system was purged by a combination of vacuum and passing a D<sub>2</sub> stream throughout it, then D<sub>2</sub> atmosphere was kept from a balloon and the solution was stirred for 48 h. The mixture was filtered through a bed of Celite and the solvent evaporated. The residue was purified by flash chromatography on silica gel (0-3% MTBE/hexane) to give 5.06 g (75% yield) of the saturated tetradeuterated alcohol **3** after the eluent evaporation.

**[3,3,4,4-<sup>2</sup>H<sub>4</sub>]-11,13-dioxatetradecan-1-ol (3).** IR 3420, 2925, 2855, 2185, 2095, 1460, 1150, 1110, 1050, 920 cm<sup>-1</sup>; <sup>1</sup>H NMR δ 4.62 (s, 2H), 3.63 (t, *J* = 6.5 Hz, 2H), 3.52 (t, *J* = 6.5 Hz, 2H), 3.36 (s, 3H), 1.63-1.51 (4H), 1.40-1.20 (8H); <sup>13</sup>C NMR δ 96.2 (CH<sub>2</sub>), 67.8 (CH<sub>2</sub>), 62.8 (CH<sub>2</sub>), 55.0 (CH<sub>3</sub>), 32.4 (CH<sub>2</sub>), 29.6 (CH<sub>2</sub>), 29.4 (CH<sub>2</sub>), 29.3 (CH<sub>2</sub>), 29.2 (CH<sub>2</sub>), 28.3 (CD<sub>2</sub>, quint, *J* = 19 Hz), 26.1 (CH<sub>2</sub>), 24.6 (CD<sub>2</sub>, quint, *J* = 19 Hz); MS *m/z* 191 (100, M<sup>+</sup>-CH<sub>3</sub>O), 161 (55), 151 (20), 141 (40); Anal. Calcd for C<sub>12</sub>H<sub>22</sub><sup>2</sup>H<sub>4</sub>O<sub>3</sub>: C, 64.82; H, 11.79. Found: C, 64.82; H, 11.62.

**Preparation of 1-Bromoalkane 4.** This reaction was accomplished according to the procedure described by Bates et al<sup>5</sup> with some modifications. A solution of NBS (26 mmol, 4.63 g in 18 mL of DMF) was added dropwise at 0 °C to a stirred DMF solution (30 mL) containing 4.44 g (20 mmol) of the tetradeuterated alcohol and 6.84 g (26 mmol) of triphenylphosphine. Stirring was continued until TLC showed absence of starting material (ca. 1 h). The reaction was quenched by addition of 5 mL of methanol to the resulting pale

yellow mixture. After 5 minutes, ethyl ether was added, the organic layer washed with brine and carefully evaporated to dryness. Residue was purified by flash chromatography on silica gel using hexane (alkanes mixture) as eluent to obtain 4.50 g (79% yield) of the tetradeuterated bromide after solvent evaporation.

**[3,3,4,4-<sup>2</sup>H<sub>4</sub>]-1-Bromo-11,13-dioxatetradecane (4).** IR 2925, 2855, 2190, 2095, 1460, 1440, 1280, 1215, 1145, 1110, 1050, 920 cm<sup>-1</sup>; <sup>1</sup>H NMR δ 4.62 (s, 2H), 3.52 (t, *J* = 6.5 Hz, 4H), 3.41 (t, *J* = 6.5 Hz, 4H), 3.36 (s, 3H), 1.83 (t, *J*<sub>1</sub> = 7 Hz, 2H), 1.59 (m, 2H), 1.42-1.24 (ca, 8H); <sup>13</sup>C NMR δ 96.2 (CH<sub>2</sub>), 67.6 (CH<sub>2</sub>), 54.9 (CH<sub>3</sub>), 33.8 (CH<sub>2</sub>), 32.4 (CH<sub>2</sub>), 29.6 (CH<sub>2</sub>), 29.3 (CH<sub>2</sub>), 29.2 (CH<sub>2</sub>), 29.0 (CH<sub>2</sub>), 27.6 (CD<sub>2</sub>, quint, *J* = 19 Hz), 27.0 (CD<sub>2</sub>, quint, *J* = 19 Hz), 26.1 (CH<sub>2</sub>); MS *m/z* 287 (7, M<sup>+</sup>+1), 285 (9, M<sup>+</sup>+1), 255 (45), 253 (50), 225 (40), 223 (55), 173 (100), 155 (40), 141 (25), 123 (15), 111 (75), 97 (50). Calcd for C<sub>12</sub>H<sub>21</sub><sup>2</sup>H<sub>4</sub>BrO<sub>2</sub>: C, 50.53; H, 8.87. Found: C, 50.52; H, 8.92.

**Kinetic enzymatic resolution of alkynols 5.** Reactions were performed in 250 ml sealed round bottom flasks. To a mixture of the racemic alkynol 12 g (101 mmol) and immobilized lipase type B from *C. antarctica* (**5a**; 1 g, **5b**; 2.2 g) in 120 mL of diisopropyl ether was added vinyl acetate (17 mL, 180 mmol). The resulting mixture was reciprocally shaken (125 rpm) at ambient temperature until GC analysis showed a 45% conversion. The chilled suspension was filtered off, the solid washed with diethyl ether and the solvent was carefully distilled to give a residue that was purified by column chromatography on silica gel. A gradient of diethyl ether in pentane (0-30%) and a careful distillation of the eluent allowed the separation of the corresponding acetate ((*S*)-(-)-**6a**; 86% ee, ((*R*)-(+)-**6b**; 76% ee) from the complementary enantiomerically enriched alkynol ((*R*)-(+)-**6a**; 80% ee, ((*S*)-(+)-**6b**; 76% ee). Acetate hydrolysis and a second chemoenzymatic resolution (**a**; 80% conversion, **b**; 70% conversion) afforded the enantiomerically pure acetates **6**.

**(*S*)-(-)-3-Acetoxy-1-hexyne (6a).** In this case, after both consecutive resolutions 4.2 g were obtained (29%) with 98% ee. IR 3295, 2965, 2935, 2875, 1745 (CO), 1450, 1375, 1235, 1020 cm<sup>-1</sup>; <sup>1</sup>H NMR δ 5.36 (dt, *J*<sub>1</sub> = 7 Hz, *J*<sub>2</sub> = 2 Hz, 1H), 2.45 (d, *J* = 2 Hz, 1H), 2.09 (s, 3H), 1.82-1.70 (2H), 1.53-1.38 (2H), 0.95 (t, *J* = 7 Hz, 3H); <sup>13</sup>C NMR δ 170.0 (CO), 81.3 (C), 73.3 (CH), 63.6, 36.5 (CH<sub>2</sub>), 21.0 (CH<sub>3</sub>), 18.2 (CH<sub>2</sub>), 13.9 (CH<sub>3</sub>); MS *m/z* 141 (15, M<sup>+</sup>+1), 99 (100); Anal. Calcd for C<sub>8</sub>H<sub>12</sub>O<sub>2</sub>: C, 68.54; H 8.63, Found: C; 68.47 H, 8.65; [ $\alpha$ ]<sub>D</sub> = -110.8 (c 1, CHCl<sub>3</sub>, 96% ee).

**(*R*)-(+)-3-Acetoxy-5-hexyne (6b)** In this case, after both consecutive resolutions 3.1 g were obtained (22%) with 96% ee. IR 3300, 2965, 2940, 2885, 1730 (CO), 1460, 1430, 1375, 1235, 1020 cm<sup>-1</sup>; <sup>1</sup>H NMR δ 4.88 (m, 1H), 2.48 (m, 2H), 2.08 (s, 3H), 2.00 (t, *J* = 2.5 Hz, 1H), 1.82-1.64 (2H), 0.93 (t, *J* = 7.5 Hz, 3H); <sup>13</sup>C NMR δ 170.6 (CO), 79.6 (C), 72.8 (CH), 70.2 (CH), 25.8 (CH<sub>2</sub>), 23.3 (CH<sub>2</sub>), 21.0 (CH<sub>3</sub>), 9.4 (CH<sub>3</sub>); MS *m/z* 141 (75, M<sup>+</sup>+1), 101 (100); Anal. Calcd for C<sub>8</sub>H<sub>12</sub>O<sub>2</sub>: C, 68.54; H 8.63, Found: C; 68.49 H, 8.55; [ $\alpha$ ]<sub>D</sub> = +62.0 (c 1, CHCl<sub>3</sub>, 94% ee).

**Acetate Saponification.** Enantiomerically pure alcohols **5** were obtained by treatment of the corresponding acetoxy derivatives **6** (0.1 mmol/mL) with a mixture of K<sub>2</sub>CO<sub>3</sub> in MeOH (20 mg/mL). Reaction evolution was monitored by TLC (16 h) and then the reaction mixture was neutralized with HCl (2 N), extracted with ethyl ether and the resulting solvent

mixture distilled. The final residue was purified by column chromatography (silica gel, pentane:diethyl ether 7:3) yielding the oily pure alkynols after eluent elimination.

**(S)-(-)-1-Hexyn-3-ol ((S)-(-)-5a).** This compound was isolated (2.45 g, 85% yield) starting from 4.20 g of acetate [ $\alpha$ ]<sub>D</sub> = -15.2 (c 1, CHCl<sub>3</sub>, 96% ee); **(R)-(-)-5-Hexyn-3-ol ((R)-(-)-5b),** This compound was isolated (1.82 g, 81% yield) starting from 3.20 g of acetate [ $\alpha$ ]<sub>D</sub> = -4.0 (c 1, CHCl<sub>3</sub>, 94% ee).

**Preparation of alkynols 7.** Coupling of alkynol **5** with bromoderivative **4** was similarly performed by the above described procedure for the preparation of compound **2**. Thus, to a solution of the corresponding enantiomerically resolved or enriched alkynol **5** (16 mmol) dissolved in 25 ml of dry HMPA and 25 ml of THF was added dropwise a solution of butyllithium (2.5 M) in hexanes (15 mL, 37.5 mmol) at -15° C. The resulting mixture was stirred for 10 min and a solution of **4** (BrCH<sub>2</sub>CH<sub>2</sub>CD<sub>2</sub>CD<sub>2</sub>(CH<sub>2</sub>)<sub>6</sub>OMOM) (2.30 g, 8 mmol) in 5 mL of THF was added dropwise at that temperature. Stirring was continued for 6 h at 0°C and then 10 h at room temperature. The reaction mixture was then poured into satd. NaHCO<sub>3</sub> (100 ml) and extracted with hexane (3 x 60 ml). Solvent was evaporated and the residue purified by flash chromatography on silica gel using a gradient hexane/MTBE (0-35%) to give the expected alkynols **7** with high yields.

**[9,9,10,10-<sup>2</sup>H<sub>4</sub>]-17,19-dioxa-5-icosyn-4-ol (7a).** IR 3455, 2930, 2860, 2190, 2095, 1460, 1150, 1110, 1045, 920 cm<sup>-1</sup>; <sup>1</sup>H NMR  $\delta$  4.62 (s, 2H), 4.36 (m, 1H), 3.52 (t, *J* = 7 Hz, 2H), 3.36 (s, 3H), 2.19 (dt, *J*<sub>1</sub> = 7 Hz, *J*<sub>2</sub> = 2 Hz, 2H), 1.74 (bs, 1H), 1.72-1.54 (4H), 1.54-1.40 (4H), 1.40-1.18 (10H), 0.95 (t, *J* = 7 Hz, 3H); <sup>13</sup>C NMR  $\delta$  96.3 (CH<sub>2</sub>), 85.4 (C), 81.3 (C), 67.8 (CH<sub>2</sub>), 62.4 (CH), 55.0 (CH<sub>3</sub>), 40.3 (CH<sub>2</sub>), 29.7 (CH<sub>2</sub>), 29.4 (CH<sub>2</sub>), 29.4 (CH<sub>2</sub>), 29.1 (CH<sub>2</sub>), 28.4 (CH<sub>2</sub>), 28.1 (CD<sub>2</sub>, quint, *J* = 19 Hz), 28.0 (CD<sub>2</sub>, quint, *J* = 19 Hz), 26.2 (CH<sub>2</sub>), 18.6 (CH<sub>2</sub>), 18.5 (CH<sub>2</sub>), 13.7 (CH<sub>3</sub>); MS *m/z* (CI) 285 (M<sup>+</sup>+1-H<sub>2</sub>O, 15), 269 (10), 253 (100), 241 (50), 151 (15), 139 (22), 125 (20), 111 (20), 97 (25);. Anal. Calcd for C<sub>18</sub>H<sub>30</sub><sup>2</sup>H<sub>4</sub>O<sub>3</sub>: C, 71.47; H, 11.34 Found: C, 71.54; H, 11.37.

**(S)-(-)-7a.** This compound was obtained (2.10 g, 87% yield) from enantiomerically pure alkynol **(S)-(-)-5a** [ $\alpha$ ]<sub>D</sub> = -4.0 (c 2, CHCl<sub>3</sub>, 96% ee).

Enantiomerically enriched **(R)-(+)-7a.** This compound was obtained (1.91 g, 79% yield) from enantiomerically enriched alkynol **(R)-(+)-5a** in 90% yield [ $\alpha$ ]<sub>D</sub> = +3.0 (c 2, CHCl<sub>3</sub>, 76% ee).

**[9,9,10,10-<sup>2</sup>H<sub>4</sub>]-17,19-dioxa-5-icosyn-3-ol (7b).** IR 3475, 2930, 2855, 2185, 2095, 1455, 1150, 1110, 1040, 920 cm<sup>-1</sup>; <sup>1</sup>H NMR  $\delta$  4.62 (s, 2H), 3.62 (m, 1H), 3.52 (t, *J* = 7 Hz, 2H), 3.36 (s, 3H), 2.41 (m, 1H), 2.27 (m, 1H), 2.20-2.13 (m, 2H), 1.98 (d, *J* = 4.5 Hz, 1H) 1.62-1.51 (4H), 1.47 (t, *J* = 7 Hz, 2H), 1.40-1.22 (10H), 0.96 (t, *J* = 7 Hz, 3H); <sup>13</sup>C NMR  $\delta$  96.3 (CH<sub>2</sub>), 83.0 (C), 76.0 (C), 71.4 (CH), 67.8 (CH<sub>2</sub>), 55.0 (CH<sub>3</sub>), 29.7 (CH<sub>2</sub>), 29.4 (CH<sub>2</sub>), 29.3 (CH<sub>2</sub>), 29.1 (CH<sub>2</sub>), 29.0 (CH<sub>2</sub>), 28.7 (CH<sub>2</sub>), 28.2 (CD<sub>2</sub>, quint, *J* = 19 Hz), 28.0 (CD<sub>2</sub>, quint, *J* = 19 Hz), 27.2 (CH<sub>2</sub>), 26.1 (CH<sub>2</sub>), 18.6 (CH<sub>2</sub>), 9.8 (CH<sub>3</sub>); MS *m/z* 285 (M<sup>+</sup>+1-H<sub>2</sub>O, 4), 271 (100), 253 (40), 241 (20), 213 (25), 195 (10), 181 (5), 167 (10), 153 (15), 139 (15), 125 (20), 111 (20), 97 (20);. Anal. Calcd for C<sub>18</sub>H<sub>30</sub><sup>2</sup>H<sub>4</sub>O<sub>3</sub>: C, 71.47; H, 11.34 Found: C, 71.45; H, 11.58.

**(R)-(-)-7b.** This compound was obtained (1.71 g, 71% yield) from enantiomerically pure alkynol **(R)-(-)-5b**; [ $\alpha$ ]<sub>D</sub> = -4.0 (c 2, CHCl<sub>3</sub>, 94% ee).

Enantiomerically enriched (*S*)-(+)-**7b**. This compound was obtained (1.76 g, 73% yield) from enantiomerically enriched alkynol (*S*)-(+)-**5b**;  $[\alpha]_D = +2.5$  (c 2, CHCl<sub>3</sub>, 76% ee).

**Kinetic enzymatic resolution of enantiomerically enriched alkynols (*R*)-(+)-**7a** and (*S*)-(+)-**7b**.** In this case, resolutions were performed using immobilized lipase from *Thermomyces lanuginosus* (TL) in 250 ml sealed round bottom flasks. To a mixture of the corresponding enantiomerically enriched alcohol **7** (4 mmol) and immobilized lipase (EP100, 5 g) in 100 mL of diisopropyl ether was added vinyl acetate (0.74 mL, 8 mmol). The resulting mixture was reciprocally shaken (125 rpm) at room temperature. The reaction evolution was followed by GC and quenched according to the initial enantiomeric excess. The suspension was filtered off, the solid support washed with Et<sub>2</sub>O and the solvent was evaporated under vacuum to give a residue that was purified by column chromatography on silica gel. A gradient of MTBE in hexane (0-30%) allowed the separation of the formed acetate **8** from the residual alcohol **7**.

**(*R*)-(+)-[9,9,10,10-<sup>2</sup>H<sub>4</sub>]-4-Acetoxy-17,19-dioxa-5-icosyne ((*R*)-(+)-**8a**).** This acetate was obtained as an enantiomerically pure compound (1.10 g, 78% yield, 82% conversion) starting from 1.21 g (4 mmol) of alkynol (*R*)-(+)-**7a**; IR 2930, 2855, 2190, 2100, 1740, 1460, 1370, 1225, 1150, 1105, 1045, 915 cm<sup>-1</sup>; <sup>1</sup>H NMR  $\delta$  5.36 (tt,  $J_1 = 7$  Hz,  $J_2 = 2$  Hz, 1H), 4.62 (s, 2H), 3.52 (t,  $J = 6.5$  Hz, 2H), 3.36 (s, 3H), 2.19 (dt,  $J_1 = 7$  Hz,  $J_2 = 2$  Hz, 2H), 2.07 (s, 3H), 1.71 (m, 2H), 1.59 (m, 2H), 1.52-1.40 (m, 4H), 1.40-1.20 (m, 8H), 0.94 (t,  $J = 7$  Hz, 3H); <sup>13</sup>C NMR  $\delta$  169.8 (CO), 96.3 (CH<sub>2</sub>), 86.0 (C), 77.6 (C), 67.7 (CH<sub>2</sub>), 64.3 (CH), 54.9 (CH<sub>3</sub>), 37.1 (CH<sub>2</sub>), 29.6 (CH<sub>2</sub>), 29.3 (CH<sub>2</sub>), 29.3 (CH<sub>2</sub>), 29.0 (CH<sub>2</sub>), 28.1 (CH<sub>2</sub>), 28.0 (CD<sub>2</sub>, quint,  $J = 19$  Hz), 27.9 (CD<sub>2</sub>, quint,  $J = 19$  Hz), 26.1 (CH<sub>2</sub>), 20.9 (CH<sub>3</sub>), 18.5 (CH<sub>2</sub>), 18.2 (CH<sub>2</sub>), 13.5 (CH<sub>3</sub>); MS  $m/z$  345 ( $M^{+}+1$ , 2), 343 ( $M^{+}-1$ , 3), 313 (5), 285 (15), 271 (10), 253 (100), 235 (15), 165 (25), 151 (20), 137 (25), 123 (30), 109 (25), 95 (15). Anal. Calcd for C<sub>20</sub>H<sub>32</sub><sup>2</sup>H<sub>4</sub>O<sub>4</sub>: C, 69.72; H, 10.54 Found: C 69.41; H, 10.66;  $[\alpha]_D = +58.0$  (c 2, CHCl<sub>3</sub>, 98% ee).

**(*S*)-(+)-[9,9,10,10-<sup>2</sup>H<sub>4</sub>]-17,19-dioxa-5-icosyn-3-ol (*S*)-(+)-**7b**.** This alkynol was obtained enantiomerically pure (0.82 g, 68% yield) starting from alkynol (*S*)-(+)-**7b** (60% of initial ee) after a 30% enzymatic conversion to the unwanted acetate. IR 3475, 2930, 2855, 2185, 2095, 1455, 1150, 1110, 1040, 920 cm<sup>-1</sup>; <sup>1</sup>H NMR  $\delta$  4.62 (s, 2H), 3.62 (m, 1H), 3.52 (t,  $J = 7$  Hz, 2H), 3.36 (s, 3H), 2.41 (m, 1H), 2.27 (m, 1H), 2.20-2.13 (m, 2H), 1.98 (d,  $J = 4.5$  Hz, 1H), 1.62-1.51 (4H), 1.47 (t,  $J = 7$  Hz, 2H), 1.40-1.22 (10H), 0.96 (t,  $J = 7$  Hz, 3H); <sup>13</sup>C NMR  $\delta$  96.3 (CH<sub>2</sub>), 83.0 (C), 76.0 (C), 71.4 (CH), 67.8 (CH<sub>2</sub>), 55.0 (CH<sub>3</sub>), 29.7 (CH<sub>2</sub>), 29.4 (CH<sub>2</sub>), 29.3 (CH<sub>2</sub>), 29.1 (CH<sub>2</sub>), 29.0 (CH<sub>2</sub>), 28.7 (CH<sub>2</sub>), 28.2 (CD<sub>2</sub>, quint,  $J = 19$  Hz), 28.0 (CD<sub>2</sub>, quint,  $J = 19$  Hz), 27.2 (CH<sub>2</sub>), 26.1 (CH<sub>2</sub>), 18.6 (CH<sub>2</sub>), 9.8 (CH<sub>3</sub>); MS  $m/z$  285 ( $M^{+}+1-H_2O$ , 4), 271 (100), 253 (40), 241 (20), 213 (25), 195 (10), 181 (5), 167 (10), 153 (15), 139 (15), 125 (20), 111 (20), 97 (20);. Anal. Calcd for C<sub>18</sub>H<sub>30</sub><sup>2</sup>H<sub>4</sub>O<sub>3</sub>: C, 71.47; H, 11.34 Found: C, 71.45; H, 11.58;  $[\alpha]_D = +4$  (c 2, CHCl<sub>3</sub>, 94% ee).

**Acetate Saponification of (*R*)-(+)-**8a**.** Alkynol (*R*)-(+)-**7a** (1.03 g, 3 mmol) was obtained by treatment of acetate (*R*)-(+)-**8a** with a mixture of K<sub>2</sub>CO<sub>3</sub> in MeOH (250 mg/10 mL) for 16 h. Neutralization with HCl (1 N), followed by the usual work up and purification by flash chromatography on silica gel according the above conditions allowed obtaining the pure alcohol in high yields. (*R*)-(+)-**7a** (0.81 g, 90%);  $[\alpha]_D = +4.0$  (c 2, 96% ee).

**Hydrogenation of methoxymethane protected alkynols **8**. General Procedure.**

To a mixture of alkynol **7** (0.76 g, 2.5 mmol) and 275 mg (0.3 mmol) of  $\text{RhCl}(\text{PPh}_3)_3$ , was added 15 mL of degassed benzene. The reaction mixture was purged passing a stream of  $\text{H}_2$  through, then  $\text{H}_2$  atmosphere was kept from the balloon and the solution was stirred for 48 h. The mixture was filtered through a bed of Celite and the solvent was evaporated. The residue was purified by flash chromatography on silica gel (0-30% MTBE/hexane) to give the pure stereoisomer **9** (64-86% yields).

**[9,9,10,10- $^2\text{H}_4$ ]-17,19-dioxaicosan-4-ol (9a).** IR 3440, 2930, 2850, 2185, 2090, 1460, 1150, 1110, 1045, 915  $\text{cm}^{-1}$ ;  $^1\text{H}$  NMR  $\delta$  4.62 (s, 2H), 3.59 (m, 1H), 3.52 (t,  $J = 7$  Hz, 2H), 3.36 (s, 3H), 1.65-1.51 (2H), 1.51-1.20 (18H), 0.93 (t,  $J = 7$  Hz, 3H);  $^{13}\text{C}$  NMR  $\delta$  96.3 ( $\text{CH}_2$ ), 71.6 ( $\text{CH}$ ), 67.8 ( $\text{CH}_2$ ), 55.0 ( $\text{CH}_3$ ), 39.6 ( $\text{CH}_2$ ), 37.5 ( $\text{CH}_2$ ), 29.7 ( $\text{CH}_2$ ), 29.6 ( $\text{CH}_2$ ), 29.5 ( $\text{CH}_2$ ), 29.4 ( $\text{CH}_2$ ), 29.3 ( $\text{CH}_2$ ), 29.3 ( $\text{CH}_2$ ), 28.8 (quint,  $J = 18$  Hz,  $\text{CD}_2$ ), 28.5 (quint,  $J = 18$  Hz,  $\text{CD}_2$ ), 26.2 ( $\text{CH}_2$ ), 25.6 ( $\text{CH}_2$ ), 18.8 ( $\text{CH}_2$ ), 14.1 ( $\text{CH}_3$ ); MS  $m/z$  289 ( $\text{M}^+ + 1 - \text{H}_2\text{O}$ , 15), 273 (35), 257 (100), 245 (75), 231 (25), 207 (20), 151 (30), 137 (35), 111 (45), 97 (70); Calcd for  $\text{C}_{18}\text{H}_{34}^2\text{H}_4\text{O}_3$ : C, 70.53; H, 12.50 Found: C 70.60; H, 12.56; Compounds (*S*)-**9a** (0.47 g, 62% yield;  $[\alpha]_{\text{D}} = +0.5$  ( $c=3$ ,  $\text{CHCl}_3$ ) and (*R*)-**9a** (0.48 g, 64% yield;  $[\alpha]_{\text{D}} = -0.7$  ( $c=2$ ,  $\text{CHCl}_3$ ) were obtained from compounds (*S*)-**7a** and (*R*)-**7a**, respectively.

**[9,9,10,10- $^2\text{H}_4$ ]-17,19-dioxaicosan-3-ol (9b).** IR 3430, 2925, 2855, 2185, 2085, 1460, 1150, 1105, 1035, 920  $\text{cm}^{-1}$ ;  $^1\text{H}$  NMR  $\delta$  4.62 (s, 2H), 3.59 (m, 1H), 3.52 (t,  $J = 7$  Hz, 3H), 3.36 (s, 3H), 1.65-1.20 (20H), 0.94 (t,  $J = 7$  Hz, 3H);  $^{13}\text{C}$  NMR  $\delta$  96.3 ( $\text{CH}_2$ ), 73.2 ( $\text{CH}$ ), 67.8 ( $\text{CH}_2$ ), 55.0 ( $\text{CH}_3$ ), 36.9 ( $\text{CH}_2$ ), 30.1 ( $\text{CH}_2$ ), 29.7 ( $\text{CH}_2$ ), 29.5 ( $\text{CH}_2$ ), 29.5 ( $\text{CH}_2$ ), 29.4 ( $\text{CH}_2$ ), 29.3 ( $\text{CH}_2$ ), 28.5 (quint,  $J = 18$  Hz,  $\text{CD}_2$ ), 26.2 ( $\text{CH}_2$ ), 25.6 ( $\text{CH}_2$ ), 9.8 ( $\text{CH}_3$ ); MS  $m/z$  289 ( $\text{M}^+ + 1 - \text{H}_2\text{O}$ , 10), 273 (40), 257 (100), 245 (80), 229 (20), 216 (10), 169 (10), 155 (15), 138 (30), 127 (25), 113 (30), 99 (35); Calcd for  $\text{C}_{18}\text{H}_{34}^2\text{H}_4\text{O}_3$ : C, 70.53; H, 12.50 Found: C 70.47; H, 12.36; Compounds (*S*)-**9b** (0.62 g, 82% yield;  $[\alpha]_{\text{D}} = +4.5$  ( $c=3$ ,  $\text{CHCl}_3$ ) and (*R*)-**9b** (0.64 g, 84% yield;  $[\alpha]_{\text{D}} = -4.6$  ( $c=3$ ,  $\text{CHCl}_3$ ) were obtained from compounds (*S*)-**7b** and (*R*)-**7b**, respectively.

**Preparation of Mesyl Esters 10. General Procedure** These products were prepared by the procedure described by Abad *et al.*<sup>6</sup> A solution of saturated alcohol **9** (0.45 g, 1.5 mmol) and  $\text{Et}_3\text{N}$  (675  $\mu\text{L}$ , 4.5 mmol) in 20 ml of  $\text{CH}_2\text{Cl}_2$  was treated with  $\text{CH}_3\text{SO}_2\text{Cl}$  (160  $\mu\text{L}$ , 2 mmol) and the mixture was stirred under argon for 2 h at ambient temperature (TLC monitoring). The reaction mixture was washed with  $\text{H}_2\text{O}$  (2 x 5 mL), dried, concentrated and the residue purified by flash chromatography on silica gel using as eluent hexane/MTBE 85:15 to give the expected products in 87-90% yields).

**[9,9,10,10- $^2\text{H}_4$ ]-17,19-dioxaicosan-4-yl methanesulfonate 10a.** IR 2930, 2850, 2185, 2090, 1460, 1355, 1170, 1110, 1045, 905  $\text{cm}^{-1}$ ;  $^1\text{H}$  NMR  $\delta$  4.71 (m,  $J = 6$  Hz, 1H), 4.62 (s, 2H), 3.52 (t,  $J = 6.5$  Hz, 2H), 3.36 (s, 3H), 3.00 (s, 3H), 1.76-1.54 (6H), 1.50-1.20 (14H), 0.95 (t,  $J = 7$  Hz, 3H);  $^{13}\text{C}$  NMR  $\delta$  96.2 ( $\text{CH}_2$ ), 83.9 ( $\text{CH}_2$ ), 67.7 ( $\text{CH}_2$ ), 54.9 ( $\text{CH}_2$ ), 38.5 ( $\text{CH}_3$ ), 36.4 ( $\text{CH}_2$ ), 34.4 ( $\text{CH}_2$ ), 34.3 ( $\text{CH}_2$ ), 29.6 ( $\text{CH}_2$ ), 29.4 ( $\text{CH}_2$ ), 29.3 ( $\text{CH}_2$ ), 29.2 ( $\text{CH}_2$ ), 29.2 ( $\text{CH}_2$ ), 29.1 ( $\text{CH}_2$ ), 28.4 (quint,  $J = 19$  Hz,  $\text{CD}_2$ ), 28.3 (quint,  $J = 19$  Hz,  $\text{CD}_2$ ), 26.1 ( $\text{CH}_2$ ), 24.8 ( $\text{CH}_2$ ), 18.2 (C), 13.7 ( $\text{CH}_3$ ); Compounds (*S*)-(-)-**10a** (0.52 g, 90%;  $[\alpha]_{\text{D}} = -3.0$  ( $c=3$ ,  $\text{CHCl}_3$ ) and (*R*)-(+)-**10a** (502 mg, 87%;  $[\alpha]_{\text{D}} = +3.0$  ( $c=3$ ,  $\text{CHCl}_3$ ) were obtained from (*S*)-**9a** and (*R*)-**9a**, respectively.

**[9,9,10,10-<sup>2</sup>H<sub>4</sub>]-17,19-dioxaicosan-3-yl methanesulfonate 10b.** IR 2930, 2850, 2185, 2090, 1460, 1355, 1170, 1110, 1045, 905 cm<sup>-1</sup>; <sup>1</sup>H NMR  $\delta$  4.66 (quint,  $J$  = 6 Hz, 1H), 4.62 (s, 2H), 3.52 (t,  $J$  = 6.5 Hz, 2H), 3.36 (s, 3H), 3.00 (s, 3H), 1.81-1.54 (6H), 1.50-1.20 (14H), 0.98 (t,  $J$  = 7 Hz, 3H); <sup>13</sup>C NMR  $\delta$  96.3 (CH<sub>2</sub>), 85.2 (CH), 67.8 (CH), 54.9 (CH<sub>3</sub>), 38.5 (CH<sub>3</sub>), 33.9 (CH<sub>2</sub>), 29.7 (CH<sub>2</sub>), 29.5 (CH<sub>2</sub>), 29.4 (CH<sub>2</sub>), 29.3 (CH<sub>2</sub>), 29.2 (CH<sub>2</sub>), 29.2 (CH<sub>2</sub>), 28.5 (quint,  $J$  = 19 Hz, CD<sub>2</sub>), 27.3 (CH<sub>2</sub>), 26.1 (CH<sub>2</sub>), 24.9 (CH<sub>2</sub>), 9.1 (CH<sub>3</sub>); Compounds (*S*)-**10b** (0.51 g, 88%; [ $\alpha$ ]<sub>D</sub> =  $\pm$ 0.0 (c=3, CHCl<sub>3</sub>)) and (*R*)-**10b** (504 mg, 87%; [ $\alpha$ ]<sub>D</sub> =  $\pm$ 0.0 (c=3, CHCl<sub>3</sub>)) were obtained from (*S*)-**9b** and (*R*)-**9b**, respectively.

**Reduction of mesylates . General Procedure.** Mesyl derivative **10** was dissolved in Et<sub>2</sub>O (14 ml) and treated with LiAlD<sub>4</sub> (8 molar equiv.) for 36 h at 20 °C (TLC monitoring). The reaction mixture was quenched by carefully adding of stoichiometric amounts of H<sub>2</sub>O, the resulting white precipitate was filtered out through Celite and the organic layer concentrated to give a residue that after purification by flash chromatography on silica gel using a gradient of 0-10% MTBE in hexane, gave the corresponding pure deuterated products **11** with 93-98% yields.

**[11,11,12,12,17-<sup>2</sup>H<sub>5</sub>]-2,4-dioxaicosane (11a).** Compounds (*S*)-**11a** (362 mg, 93%) and (*R*)-**11a** (360 mg, 95%) were obtained from 0.52 g (1.35 mmol) of (*S*)-**10a** and 0.50 g (1.30 mmol) of (*R*)-**10a**, respectively; IR 2955, 2925, 2855, 2185, 2140, 2090, 1730, 1465, 1375, 1150, 1100, 1045, 915 cm<sup>-1</sup>; <sup>1</sup>H NMR  $\delta$  4.62 (s, 2H), 3.52 (t,  $J$  = 6.5 Hz, 2H), 3.36 (s, 3H) 1.63-1.55 (2H), 1.40-1.18 (17H), 0.88 (t,  $J$  = 7 Hz, 3H); <sup>13</sup>C NMR  $\delta$  96.4 (CH<sub>2</sub>), 67.8 (CH<sub>2</sub>), 55.0 (CH<sub>3</sub>), 31.8 (CH<sub>2</sub>), 29.7 (CH<sub>2</sub>), 29.7 (CH<sub>2</sub>), 29.6 (CH<sub>2</sub>), 29.5 (CH<sub>2</sub>), 29.4 (CH<sub>2</sub>), 29.3 (CH<sub>2</sub>), 28.9 (t,  $J$  = 19 Hz, CHD), 28.7 (quint,  $J$  = 19 Hz, CD<sub>2</sub>), 28.6 (quint,  $J$  = 19 Hz, CD<sub>2</sub>), 26.2 (CH<sub>2</sub>), 22.6 (CH<sub>2</sub>), 14.0 (CH<sub>3</sub>); MS  $m/z$  309 (M<sup>+</sup>+28+1, 5), 290 (M<sup>+</sup>-1, 20), 274 (10), 260 (100), 246 (20), 230 (45); Anal. Calcd for C<sub>18</sub>H<sub>33</sub><sup>2</sup>H<sub>5</sub>O<sub>2</sub>: C, 74.16; H, 13.15. Found: C, 74.03; H, 13.19.

**[11,11,12,12,18-<sup>2</sup>H<sub>5</sub>]-2,4-dioxaicosane (11b).** Compounds (*S*)-**11b** (378 mg, 98%) and (*R*)-**11b** (361 mg, 94%) were obtained from 0.51 g (1.35 mmol) of (*S*)-**10b** and 0.50 g (1.30 mmol) of (*R*)-**10b**, respectively; IR 2925, 2850, 2185, 2140, 2090, 1465, 1380, 1210, 1150, 1110, 1045, 920 cm<sup>-1</sup>; <sup>1</sup>H NMR  $\delta$  4.62 (s, 2H), 3.52 (t,  $J$  = 6.5 Hz, 2H), 3.36 (s, 3H) 1.63-1.55 (2H), 1.40-1.18 (17H), 0.88 (t,  $J$  = 7 Hz, 3H); <sup>13</sup>C NMR  $\delta$  96.3 (CH<sub>2</sub>), 67.8 (CH<sub>2</sub>), 55.0 (CH<sub>3</sub>), 31.5 (t,  $J$  = 19 Hz, CHD), 29.7 (CH<sub>2</sub>), 29.7 (CH<sub>2</sub>), 29.7 (CH<sub>2</sub>), 29.6 (CH<sub>2</sub>), 29.6 (CH<sub>2</sub>), 29.6 (CH<sub>2</sub>), 29.4 (CH<sub>2</sub>), 29.3 (CH<sub>2</sub>), 28.9 (quint,  $J$  = 19 Hz, CD<sub>2</sub>), 28.6 (quint,  $J$  = 19 Hz, CD<sub>2</sub>), 26.2 (CH<sub>2</sub>), 22.6 (CH<sub>2</sub>), 14.0 (CH<sub>3</sub>); MS  $m/z$  309 (M<sup>+</sup>+28+1, 5), 290 (M<sup>+</sup>-1, 25), 274 (M<sup>+</sup>-2, 90), 260 (100), 246 (20), 230 (45), 128 (15), 113 (10), 99 (15). Anal. Calcd for C<sub>18</sub>H<sub>33</sub><sup>2</sup>H<sub>5</sub>O<sub>2</sub>: C, 74.16; H, 13.15. Found: C, 74.03; H, 13.19.

**Alcohol deprotection. General Procedure.** Enantiotopically deuterated compounds **11a** and **11b** were deprotected to the corresponding alcohols by treatment with a 0.5M solution of HCl in MeOH for 36 h at ambient temperature (1 mmol/10 mL). The solution was neutralized with saturated aqueous NaHCO<sub>3</sub>, concentrated and the residue extracted with CH<sub>2</sub>Cl<sub>2</sub>, dried, and purified by flash chromatography on silica gel using a gradient of 0-30% MTBE in hexane, obtaining the corresponding pure deuterated alcohols in 83-90% yields.

**[7,7,8,8,13-<sup>2</sup>H<sub>5</sub>]-1-hexadecanol (12a)** Compounds (*S*)-**12a** (212 mg, 86%) and (*R*)-**12a** (220 mg, 89%) were isolated from 292 mg of (*S*)-**11a** and (*R*)-**11a**, respectively; m.p. 48-49 °C; IR 3260, 2960, 2915, 2850, 2175, 2130, 2075, 1460, 1210, 1060, 755 cm<sup>-1</sup>; <sup>1</sup>H NMR  $\delta$  3.63

(t,  $J = 6.5$  Hz, 2H), 1.64-1.48 (2H), 1.48-1.18 (21H), 0.88 (t,  $J = 7$  Hz, 3H);  $^{13}\text{C}$  NMR  $\delta$  62.7 ( $\text{CH}_2$ ), 32.7 ( $\text{CH}_2$ ), 31.8 ( $\text{CH}_2$ ), 29.7 ( $\text{CH}_2$ ), 29.6 ( $\text{CH}_2$ ), 29.6 ( $\text{CH}_2$ ), 29.5 ( $\text{CH}_2$ ), 29.5 ( $\text{CH}_2$ ), 29.4 ( $\text{CH}_2$ ), 29.3 ( $\text{CH}_2$ ), 28.9 (t,  $J = 19$  Hz, CHD), 28.6 (quint,  $J = 19$  Hz,  $\text{CD}_2$ ), 25.8 ( $\text{CH}_2$ ), 22.6 ( $\text{CH}_2$ ), 14.0 ( $\text{CH}_3$ ); MS  $m/z$  246 ( $\text{M}^+ - 1$ , 100), 230 (95), 187 (5), 173 (10), 158 (15), 144 (10), 129 (10), 114 (10), 100 (15). Anal. Calcd for  $\text{C}_{16}\text{H}_{29}\text{H}_5\text{O}$ : C, 77.65; H, 13.86. Found: C, 77.57; H, 13.69.

**[7,7,8,8,14- $^2\text{H}_5$ ]-1-hexadecanol (12b)** Compounds (*S*)-**12b** (230 mg, 93%) and (*R*)-**12b** (223 mg, 90%) were obtained from 292 mg of (*S*)-**11b** and (*R*)-**11b**, respectively; m.p. 48-50 °C; IR 3330, 2955, 2915, 2850, 2175, 2135, 2080, 1460, 1210, 1060, 755  $\text{cm}^{-1}$ ;  $^1\text{H}$  NMR  $\delta$  3.64 (t,  $J = 6.5$  Hz, 2H), 1.64-1.48 (2H), 1.48-1.18 (21H), 0.88 (t,  $J = 7$  Hz, 3H);  $^{13}\text{C}$  NMR  $\delta$  62.8 ( $\text{CH}_2$ ), 32.7 ( $\text{CH}_2$ ), 31.5 (t,  $J = 19$  Hz, CHD), 29.7 ( $\text{CH}_2$ ), 29.6 ( $\text{CH}_2$ ), 29.6 ( $\text{CH}_2$ ), 29.6 ( $\text{CH}_2$ ), 29.4 ( $\text{CH}_2$ ), 29.3 ( $\text{CH}_2$ ), 29.2 ( $\text{CH}_2$ ), 28.9 (quint,  $J = 19$  Hz,  $\text{CD}_2$ ), 28.6 (quint,  $J = 19$  Hz,  $\text{CD}_2$ ), 25.7 ( $\text{CH}_2$ ), 22.5 ( $\text{CH}_2$ ), 14.0 ( $\text{CH}_3$ ); MS  $m/z$  246 ( $\text{M}^+ - 1$ , 100), 230 (95), 187 (5), 173 (10), 158 (15), 144 (10), 129 (10), 114 (10), 100 (15); Anal. Calcd for  $\text{C}_{16}\text{H}_{29}\text{H}_5\text{O}$ : C, 77.65; H, 13.86 Found: C, 77.58; H, 13.71.

**Preparation of Carboxylic Acids.** Compounds **1** were prepared according to a method previously reported involving the alcohol oxidation in two steps.<sup>3</sup>

**[7,7,8,8,13- $^2\text{H}_5$ ]-hexadecanoic acid 1a.** Compounds (*S*)-**1a** (102 mg, 78%) and (*R*)-**1a** (106 mg, 81%) were obtained from 124 mg (0.5 mmol) of alcohols (*S*)-**12a** and (*R*)-**12a**, respectively. m.p. 60-62; IR 3020, 2915, 2850, 2175, 2125, 2080, 1695, 1460, 1405, 1295, 1200, 935, 755  $\text{cm}^{-1}$ ;  $^1\text{H}$  NMR  $\delta$  2.35 (t,  $J = 7.5$  Hz, 2H), 1.68-1.58 (m, 2H), 1.40-1.16 (21H), 0.88 (t,  $J = 7$  Hz, 3H);  $^{13}\text{C}$  NMR  $\delta$  180.5 (CO), 34.1 ( $\text{CH}_2$ ), 31.8 ( $\text{CH}_2$ ), 29.7 ( $\text{CH}_2$ ), 29.7 ( $\text{CH}_2$ ), 29.6 ( $\text{CH}_2$ ), 29.4 ( $\text{CH}_2$ ), 29.2 ( $\text{CH}_2$ ), 29.1 ( $\text{CH}_2$ ), 28.9 (t,  $J = 19$  Hz, CHD), 28.6 (quint,  $J = 19$  Hz,  $\text{CD}_2$ ), 28.6 (quint,  $J = 19$  Hz,  $\text{CD}_2$ ), 24.7 ( $\text{CH}_2$ ), 22.7 ( $\text{CH}_2$ ), 14.1 ( $\text{CH}_3$ ); MS  $m/z$  (Methyl ester), 304 (20,  $\text{M}^+ + 28$ ), 276 (100,  $\text{M}^+ + 1$ ); Anal. Calcd for  $\text{C}_{16}\text{H}_{27}\text{H}_5\text{O}_2$ : C, 73.50; H, 12.34 Found: C, 73.44; H, 12.14.

**[7,7,8,8,14- $^2\text{H}_5$ ]-hexadecanoic acid 1b.** Compounds (*S*)-**1b** (104 mg, 79%) and (*R*)-**1b** (105 mg, 80%) were obtained from 124 mg (0.5 mmol) of (*S*)-**12b** and (*R*)-**12b**, respectively. m.p. 60-62°; IR 3020, 2915, 2850, 2180, 2135, 2080, 1700, 1460, 1405, 1295, 1210, 940, 755  $\text{cm}^{-1}$ ;  $^1\text{H}$  NMR  $\delta$  2.35 (t,  $J = 7.5$  Hz, 2H), 1.68-1.58 (m, 2H), 1.40-1.16 (21H), 0.88 (t,  $J = 7$  Hz, 3H);  $^{13}\text{C}$  NMR  $\delta$  180.5 (CO), 34.1 ( $\text{CH}_2$ ), 31.5 (t,  $J = 19$  Hz, CHD), ( $\text{CH}_2$ ), 29.7 ( $\text{CH}_2$ ), 29.6 ( $\text{CH}_2$ ), 29.4 ( $\text{CH}_2$ ), 29.3 ( $\text{CH}_2$ ), 29.2 ( $\text{CH}_2$ ), 29.1 ( $\text{CH}_2$ ), 28.7 (quint,  $J = 19$  Hz,  $\text{CD}_2$ ), 28.6 (quint,  $J = 19$  Hz,  $\text{CD}_2$ ), 24.7 ( $\text{CH}_2$ ), 22.6 ( $\text{CH}_2$ ), 14.0 ( $\text{CH}_3$ ); MS  $m/z$  (Methyl ester), 304 (20,  $\text{M}^+ + 28$ ), 276 (100,  $\text{M}^+ + 1$ ); Anal. Calcd for  $\text{C}_{16}\text{H}_{27}\text{H}_5\text{O}_2$ : C, 73.50; H, 12.34 Found: C, 73.46; H, 12.10.

**Aryl acetic esters preparation of the different stereoisomers of alkynols 5 and 7 (13 and 14).** Carbodiimide (ECD, 0.14 mmol) was added to a mixture of the corresponding alcohol (0.10 mmol), DMAP (0.10 mmol) and (*R*)-(-)-MPA (or 9-AMA) (0.14 mmol) in dry  $\text{CH}_2\text{Cl}_2$  (3 ml). The mixture was stirred for 2 h at room temperature, washed with saturated aqueous  $\text{NaHCO}_3$  solution and the organic layer concentrated under reduced pressure. The residue was purified by flash chromatography on silica gel using a gradient of 0-20% MTBE in hexane (75-90% isolated yields).



**(S)-3-Hex-1-ynyl-(R)- $\alpha$ -O-methyl- $\alpha$ -phenyl acetate (Ester (S)-13a)** (From CALB resolved acetate). IR 3290, 2960, 2930, 2870, 1750 (CO), 1450, 1240, 1170, 1100, 990  $\text{cm}^{-1}$ ;  $^1\text{H}$  NMR  $\delta$  7.50-7.41 (2H), 7.40-7.30 (3H), 5.40 (dt,  $J_1 = 6.5$  Hz,  $J_2 = 2$  Hz, 1H), 4.79 (s, 1H), 3.43 (s, 3H), 2.46 (d,  $J = 2$  Hz, 1H), 1.68-1.55 (2H), 1.29-1.12 (2H), 0.78 (t,  $J = 7.5$  Hz, 3H);  $^{13}\text{C}$  NMR  $\delta$  169.6 (CO), 135.9 (C), 128.7 (CH), 128.5 (CH), 127.2 (CH), 82.2 (CH), 80.7 (CH), 73.9 (C), 64.1 (CH), 57.3 ( $\text{CH}_3$ ), 36.3 ( $\text{CH}_2$ ), 17.7 ( $\text{CH}_2$ ), 13.3 ( $\text{CH}_3$ );  $[\alpha]_{\text{D}} = -112.0$  (c 2,  $\text{CHCl}_3$ , 96% de).

**(R)-3-Hex-1-ynyl-(R)- $\alpha$ -O-methyl- $\alpha$ -phenyl acetate (Ester (R)-13a)** (From CALB residual alcohol). IR 3290, 2960, 2930, 2870, 1750 (CO), 1450, 1240, 1170, 1110, 990  $\text{cm}^{-1}$ ;  $^1\text{H}$  NMR  $\delta$  7.50-7.42 (2H), 7.42-7.30 (3H), 5.40 (dt,  $J_1 = 6.5$  Hz,  $J_2 = 2$  Hz, 1H), 4.79 (s, 1H), 3.43 (s, 3H), 2.36 (d,  $J = 2$  Hz, 1H), 1.82-1.70 (2H), 1.48-1.36 (2H), 0.92 (t,  $J = 6.5$  Hz, 3H);  $^{13}\text{C}$  NMR  $\delta$  169.6 (CO), 135.6 (C), 128.6 (CH), 128.4 (CH), 127.0 (CH), 82.4 (CH), 80.3 (CH), 73.8 (C), 64.3 (CH), 57.2 ( $\text{CH}_3$ ), 36.3 ( $\text{CH}_2$ ), 18.0 ( $\text{CH}_2$ ), 13.4 ( $\text{CH}_3$ );  $[\alpha]_{\text{D}} = -10.6$  (c 2,  $\text{CHCl}_3$ , 60% de).

**(R)-3-Hex-5-ynyl-(R)- $\alpha$ -O-methyl- $\alpha$ -phenyl acetate (Ester (R)-13b)** (From CALB resolved acetate). IR 3300, 2975, 2940, 2875, 1750 (CO), 1460, 1260, 1185, 1100  $\text{cm}^{-1}$ ;  $^1\text{H}$  NMR  $\delta$  7.50-7.42 (2H), 7.42-7.30 (3H), 4.94 (m, 1H), 4.78 (s, 1H), 3.44 (s, 3H), 2.33 (m, 2H), 1.81 (t,  $J = 3$  Hz, 1H), 1.80-1.62 (2H), 0.88 (t,  $J = 7.5$  Hz, 3H);  $^{13}\text{C}$  NMR  $\delta$  170.4 (CO), 136.2 (C), 128.6 (CH), 128.5 (CH), 127.1 (CH), 82.6 (CH), 79.1 (CH), 73.8 (C), 70.3 (CH), 57.3 ( $\text{CH}_3$ ), 25.9 ( $\text{CH}_2$ ), 23.2 ( $\text{CH}_2$ ), 9.3 ( $\text{CH}_3$ );  $[\alpha]_{\text{D}} = -62.0$  (c 1,  $\text{CHCl}_3$ , 94% de).

**(S)-3-Hex-5-ynyl-(R)- $\alpha$ -O-methyl- $\alpha$ -phenyl acetate (Ester (S)-13b)** (From CALB residual alcohol). IR 3310, 2975, 2940, 1745 (CO), 1460, 1245, 1180, 1100  $\text{cm}^{-1}$ ;  $^1\text{H}$  NMR  $\delta$  7.50-7.42 (2H), 7.42-7.30 (3H), 4.92 (m, 1H), 4.78 (s, 1H), 3.43 (s, 3H), 2.48 (m, 2H), 1.97 (t,  $J = 3$  Hz, 1H), 1.68-1.50 (2H), 0.63 (t,  $J = 7.5$  Hz, 3H);  $^{13}\text{C}$  NMR  $\delta$  170.3 (CO), 136.3 (C), 128.7 (CH), 128.5 (CH), 127.2 (CH), 82.5 (CH), 79.4 (CH), 73.8 (C), 70.4 (CH), 57.3 ( $\text{CH}_3$ ), 25.9 ( $\text{CH}_2$ ), 23.6 ( $\text{CH}_2$ ), 9.0 ( $\text{CH}_3$ );  $[\alpha]_{\text{D}} = -100.6$  (c 1,  $\text{CHCl}_3$ , 64% de).

**(S)-[9,9,10,10- $^2\text{H}_4$ ]-17,19-dioxa-4-eico-5-ynyl-(R)- $\alpha$ -O-methyl- $\alpha$ -phenyl acetate (Ester (S)-14a)** (From CALB resolved acetate). IR 2935, 2850, 2190, 2090, 1750 (CO), 1455, 1245, 1150, 1110, 1050, 920  $\text{cm}^{-1}$ ;  $^1\text{H}$  NMR  $\delta$  7.47-7.41 (2H), 7.39-7.28 (3H), 5.41 (tt,  $J_1 = 6.5$  Hz,  $J_2 = 2$  Hz, 1H), 4.78 (s, 1H), 4.62 (s, 2H), 3.52 (t,  $J = 6.5$  Hz, 2H), 3.42 (s, 3H), 3.36 (s, 3H), 2.17 (dt,  $J_1 = 7$  Hz,  $J_2 = 2$  Hz, 2H), 1.65-1.52 (4H), 1.45 (t,  $J = 7$  Hz, 3H), 1.42-1.10 (10H), 0.77 (t,  $J = 7$  Hz, 3H);  $^{13}\text{C}$  NMR  $\delta$  169.7 (CO), 136.1 (C), 128.6 (CH), 128.5 (CH), 127.2 (CH), 96.3 ( $\text{CH}_2$ ), 86.6 (C), 82.3 (CH), 77.3 (C), 67.8 ( $\text{CH}_2$ ), 65.0 (CH), 57.3 ( $\text{CH}_3$ ), 55.0 ( $\text{CH}_3$ ), 36.9 ( $\text{CH}_2$ ), 29.7 ( $\text{CH}_2$ ), 29.4 ( $\text{CH}_2$ ), 29.4 ( $\text{CH}_2$ ), 29.1 ( $\text{CH}_2$ ), 28.1 ( $\text{CH}_2$ ), 26.1 ( $\text{CH}_2$ ), 18.5 ( $\text{CH}_2$ ), 17.9 ( $\text{CH}_2$ ), 13.3 ( $\text{CH}_3$ );  $[\alpha]_{\text{D}} = -60.6$  (c 2,  $\text{CHCl}_3$ , 96% de).

**(R)-[9,9,10,10- $^2\text{H}_4$ ]-17,19-dioxa-4-eico-5-ynyl-(R)- $\alpha$ -O-methyl- $\alpha$ -phenyl-acetate (Ester (R)-14a)** (From CALB residual alcohol). IR 2935, 2850, 2190, 2090, 1750 (CO), 1455, 1245, 1150, 1110, 1050, 920  $\text{cm}^{-1}$ ;  $^1\text{H}$  NMR  $\delta$  7.47-7.41 (2H), 7.39-7.28 (3H), 5.40 (tt,  $J_1 = 6.5$  Hz,  $J_2 = 2$  Hz, 1H), 4.78 (s, 1H), 4.62 (s, 2H), 3.52 (t,  $J = 6.5$  Hz, 2H), 3.43 (s, 3H), 3.36 (s, 3H), 2.09 (dt,  $J_1 = 7$  Hz,  $J_2 = 2$  Hz, 2H), 1.72 (m, 2H), 1.59 (m, 2H), 1.46-1.16 (14H), 0.90 (t,  $J = 7$  Hz, 3H);  $^{13}\text{C}$  NMR  $\delta$  169.8 (CO), 135.9 (C), 128.5 (CH), 128.4 (CH), 127.1 (CH), 96.3 ( $\text{CH}_2$ ), 86.5 (C), 82.6 (CH), 76.9 (C), 67.8 ( $\text{CH}_2$ ), 65.3 (CH), 57.3 ( $\text{CH}_3$ ), 55.0

(CH<sub>3</sub>), 36.9 (CH<sub>2</sub>), 29.7 (CH<sub>2</sub>), 29.4 (CH<sub>2</sub>), 29.4 (CH<sub>2</sub>), 29.1 (CH<sub>2</sub>), 28.1 (CH<sub>2</sub>), 26.1 (CH<sub>2</sub>), 18.4 (CH<sub>2</sub>), 18.2 (CH<sub>2</sub>), 13.5 (CH<sub>3</sub>); [ $\alpha$ ]<sub>D</sub> = +15.0 (c 0.5, CHCl<sub>3</sub>, 96% de).

**(R)-[9,9,10,10-<sup>2</sup>H<sub>4</sub>]-17,19-dioxa-3-eico-5-ynyl-(R)- $\alpha$ -O-methyl- $\alpha$ -phenyl acetate (Ester (R)-14b)** (From CALB resolved acetate). IR 2930, 2850, 2190, 2095, 1745 (CO), 1450, 1255, 1175, 1105, 1040, 920 cm<sup>-1</sup>; <sup>1</sup>H NMR  $\delta$  7.49-7.42 (2H), 7.39-7.28 (3H), 4.90 (m, 1H), 4.77 (s, 1H), 4.62 (s, 2H), 3.52 (t,  $J$  = 6.5 Hz, 2H), 3.44 (s, 3H), 3.36 (s, 3H), 2.28 (m, 2H), 2.00 (m, 2H), 1.80-1.50 (4H), 1.42-1.16 (10H), 0.87 (t,  $J$  = 7 Hz, 3H); <sup>13</sup>C NMR  $\delta$  170.3 (CO), 136.3 (C), 128.4 (CH), 128.4 (CH), 127.0 (CH), 96.3 (CH<sub>2</sub>), 82.7 (CH), 82.4 (C), 74.7 (C), 74.6 (CH), 67.8 (CH<sub>2</sub>), 57.3 (CH<sub>3</sub>), 55.0 (CH<sub>3</sub>), 29.7 (CH<sub>2</sub>), 29.4 (CH<sub>2</sub>), 29.4 (CH<sub>2</sub>), 29.1 (CH<sub>2</sub>), 28.6 (CH<sub>2</sub>), 26.1 (CH<sub>2</sub>), 25.9 (CH<sub>2</sub>), 23.5 (CH<sub>2</sub>), 18.5 (CH<sub>2</sub>), 9.3 (CH<sub>3</sub>); [ $\alpha$ ]<sub>D</sub> = -13.0 (c 1, CHCl<sub>3</sub>, 94% de).

**(S)-[9,9,10,10-<sup>2</sup>H<sub>4</sub>]-17,19-dioxa-3-eico-5-ynyl-(R)- $\alpha$ -O-methyl- $\alpha$ -phenyl acetate (Ester (S)-14b)** (From CALB and TL residual alcohol). IR 2930, 2850, 2190, 2095, 1745 (CO), 1450, 1255, 1175, 1105, 1040, 920 cm<sup>-1</sup>; <sup>1</sup>H NMR  $\delta$  7.49-7.42 (2H), 7.39-7.28 (3H), 4.87 (m, 1H), 4.77 (s, 1H), 4.62 (s, 2H), 3.51 (t,  $J$  = 6.5 Hz, 2H), 3.42 (s, 3H), 3.36 (s, 3H), 2.43 (m, 2H), 2.10 (m, 2H), 1.70-1.58 (4H), 1.43 (t,  $J$  = 7 Hz, 2H), 1.40-1.18 (10H), 0.62 (t,  $J$  = 7.5 Hz, 3H); <sup>13</sup>C NMR  $\delta$  170.2 (CO), 136.4 (C), 128.5 (CH), 128.4 (CH), 127.2 (CH), 96.3 (CH<sub>2</sub>), 82.6 (CH), 82.4 (CH), 74.9 (C), 74.5 (CH), 67.8 (CH<sub>2</sub>), 57.2 (CH<sub>3</sub>), 54.9 (CH<sub>3</sub>), 36.9 (CH<sub>2</sub>), 29.7 (CH<sub>2</sub>), 29.4 (CH<sub>2</sub>), 29.3 (CH<sub>2</sub>), 29.1 (CH<sub>2</sub>), 28.6 (CH<sub>2</sub>), 26.1 (CH<sub>2</sub>), 25.9 (CH<sub>2</sub>), 23.8 (CH<sub>2</sub>), 18.6 (CH<sub>2</sub>), 8.9 (CH<sub>3</sub>); [ $\alpha$ ]<sub>D</sub> = -50.1 (c 2, CHCl<sub>3</sub>, 94% de).

**In Vivo Gland Culture Procedure.** In these experiments, newly-emerged virgin *T. pityocampa* females were briefly anesthetized on ice and pheromone glands were everted and impregnated (1  $\mu$ L every 3 hours x 4 times) with the DMSO solutions of stereospecifically deuterated probes **1** (10 mg/mL each). The *in vivo* incubation proceeded for 36 h. In order to obtain the methyl ester derivatives of the gland lipids for analysis, the pheromone glands were excised and soaked in chloroform methanol (2:1) at 25 °C for 1 h and base-methanolized in 0.5 M KOH for 1 h. After this time, the organic solution was neutralized with 1 N HCl, washed with satd. NaHCO<sub>3</sub> aqueous solution, extracted with hexane, concentrated and the residue was treated with a freshly prepared diazomethane solution. Ten glands were used for each assay.

**Instrumental Analysis of the Biological Extracts.** The GC-MS analysis of biological extracts was performed by Chemical Ionization (CI) using methane as ionization gas. The system was equipped with a non-polar HP5-MS capillary column (30 m x 0.25 mm I.D., 0.25  $\mu$ m stationary phase thickness) and using the following program: from 100 °C to 220 °C at 5 °C/min and then to 300 °C at 7 °C/min after an initial delay of 1 min. Analyses were carried out on methanolized lipidic extracts from pheromone glands with the equipment and conditions described above. Kinetic isotope effects were calculated from the ratios of formed products from each probe which afforded a cluster of ions, analyzed as methyl esters, and are based on the abundance of the respective molecular ions in the range  $m/z$  265-274 in which the most abundant ones corresponded to the molecular ion of the resulting isotopomers.

## NMR Spectra

**1a**  $\text{CH}_3\text{CH}_2\text{CH}_2\text{CHDCH}_2\text{CH}_2(\text{CH}_2)_2(\text{CD}_2)_2(\text{CH}_2)_5\text{COOH}$

$^1\text{H}$  NMR

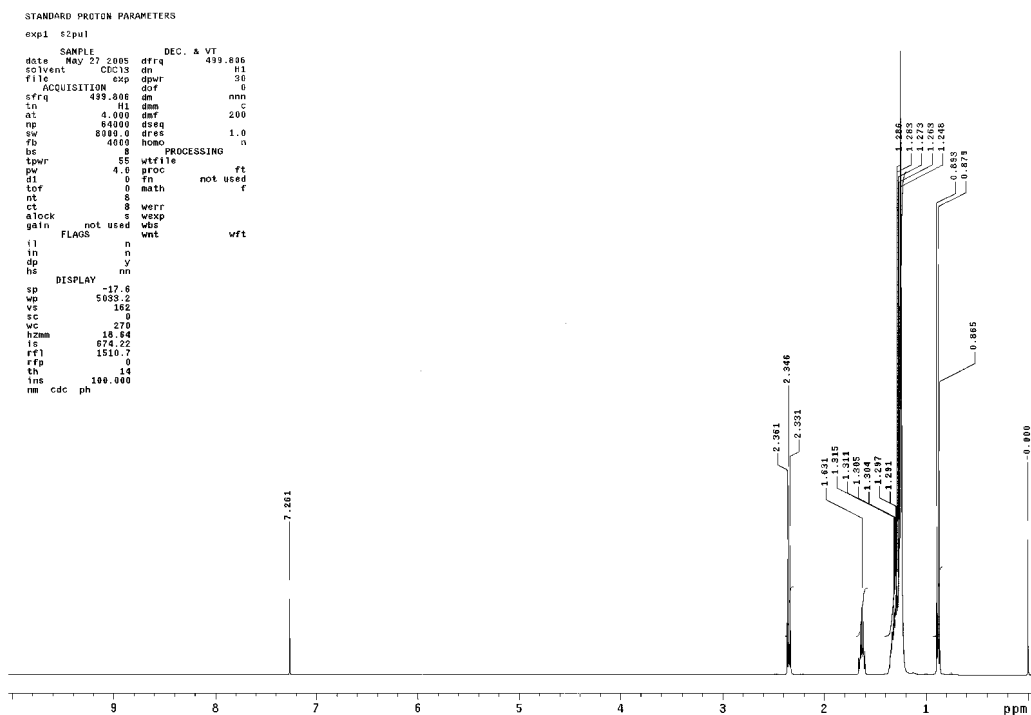

$^{13}\text{C}$  NMR

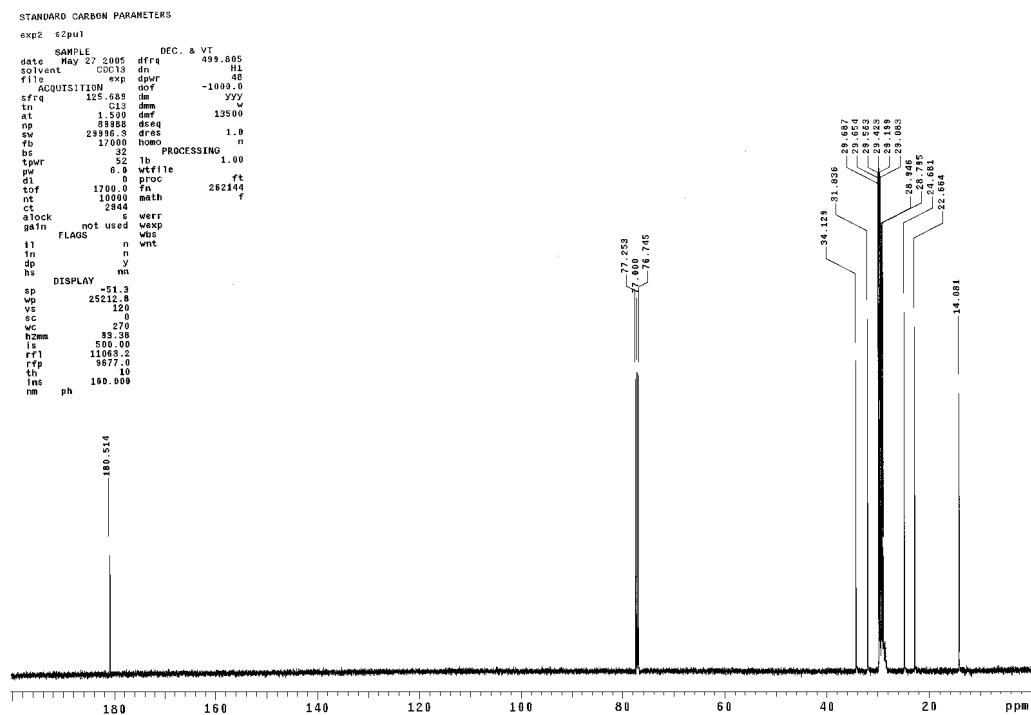

## DEPT 1(CH)

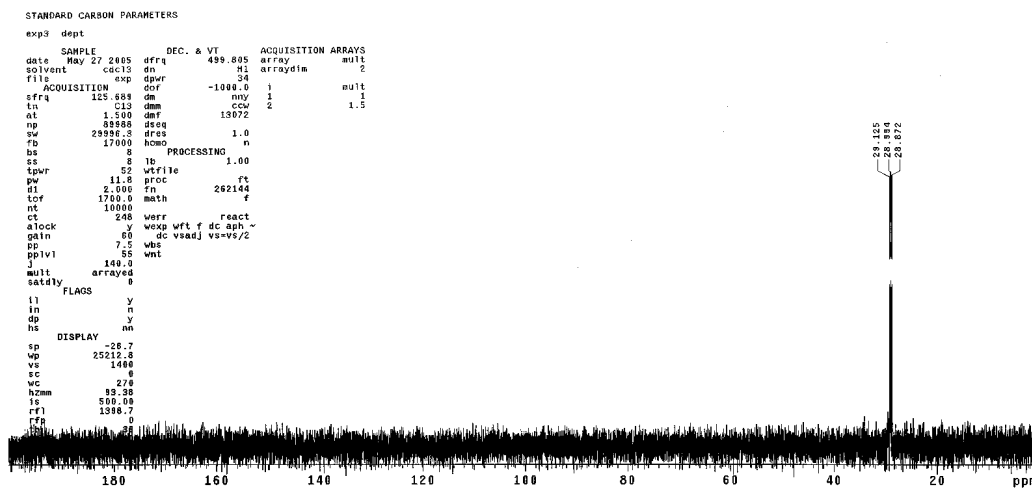DEPT 2 (CH, CH<sub>3</sub>/CH<sub>2</sub>)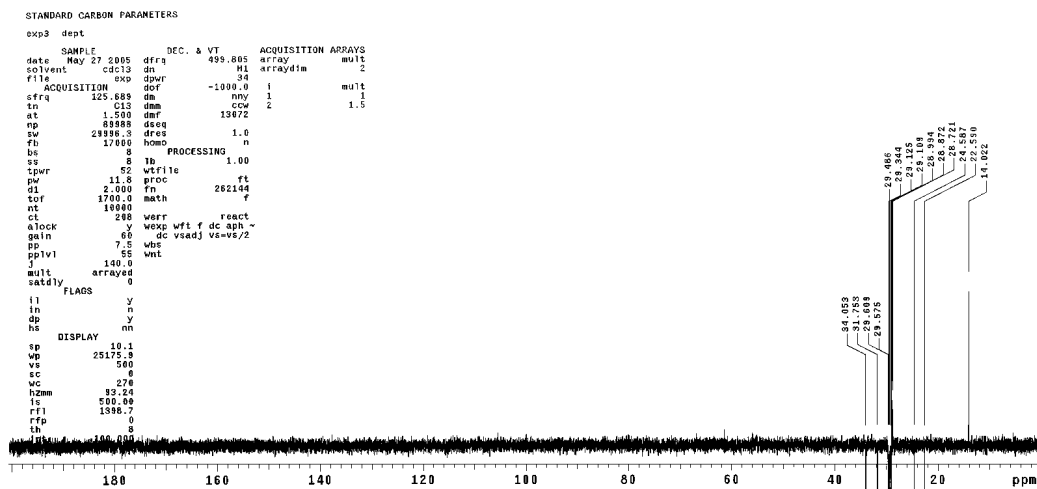

**1b**  $\text{CH}_3\text{CH}_2\text{CHDCH}_2\text{CH}_2\text{CH}_2(\text{CH}_2)_2(\text{CD}_2)_2(\text{CH}_2)_5\text{COOH}$   
 $^1\text{H}$  NMR

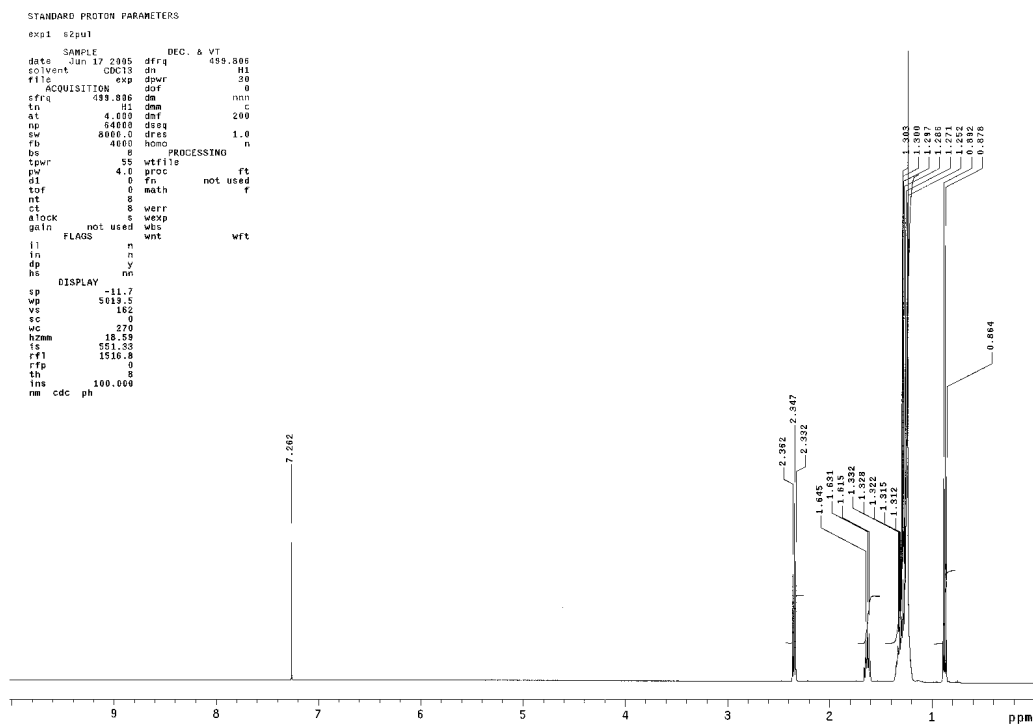

$^{13}\text{C}$  NMR

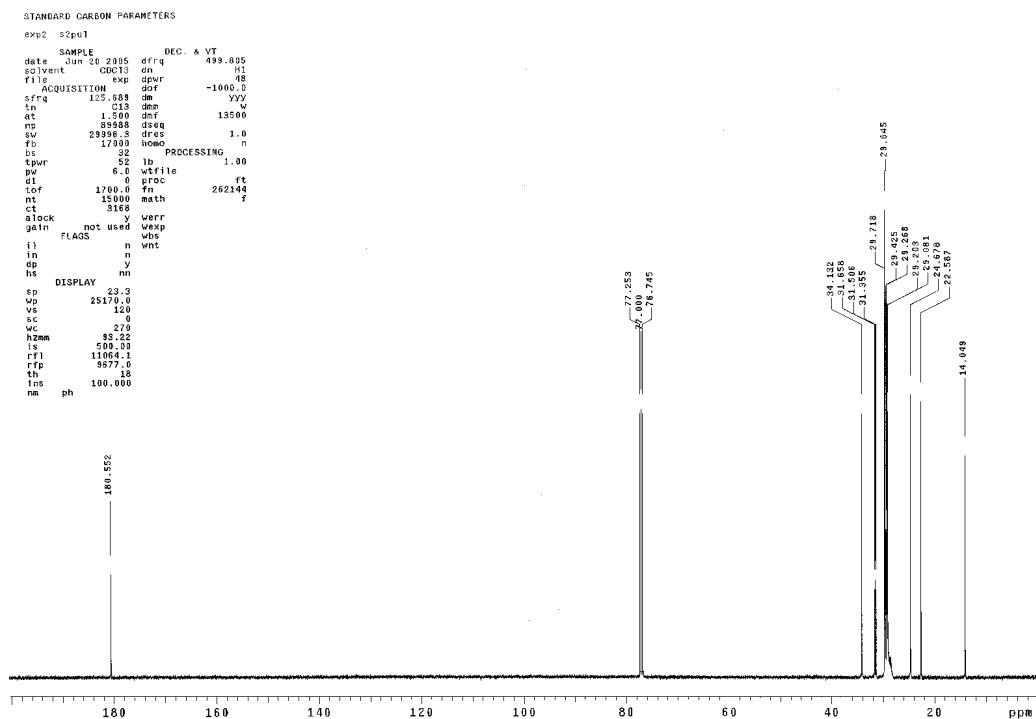

## DEPT 1(CH)

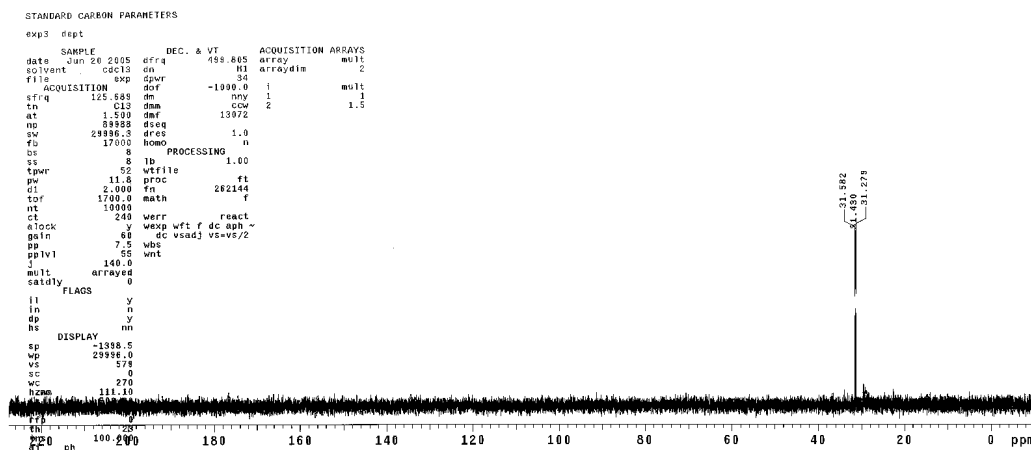DEPT 2 (CH, CH<sub>3</sub>/CH<sub>2</sub>)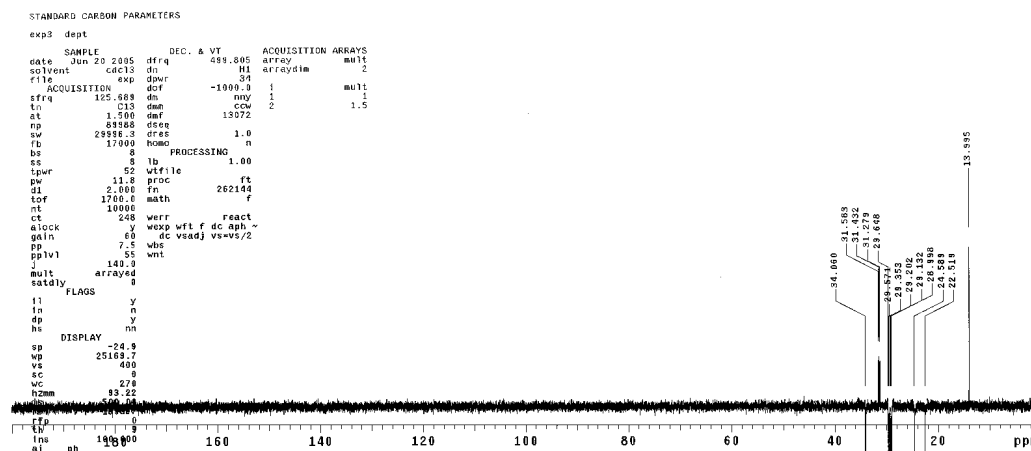

**2 HOCH<sub>2</sub>CH<sub>2</sub>C≡C(CH<sub>2</sub>)<sub>6</sub>OMOM**  
<sup>1</sup>H NMR

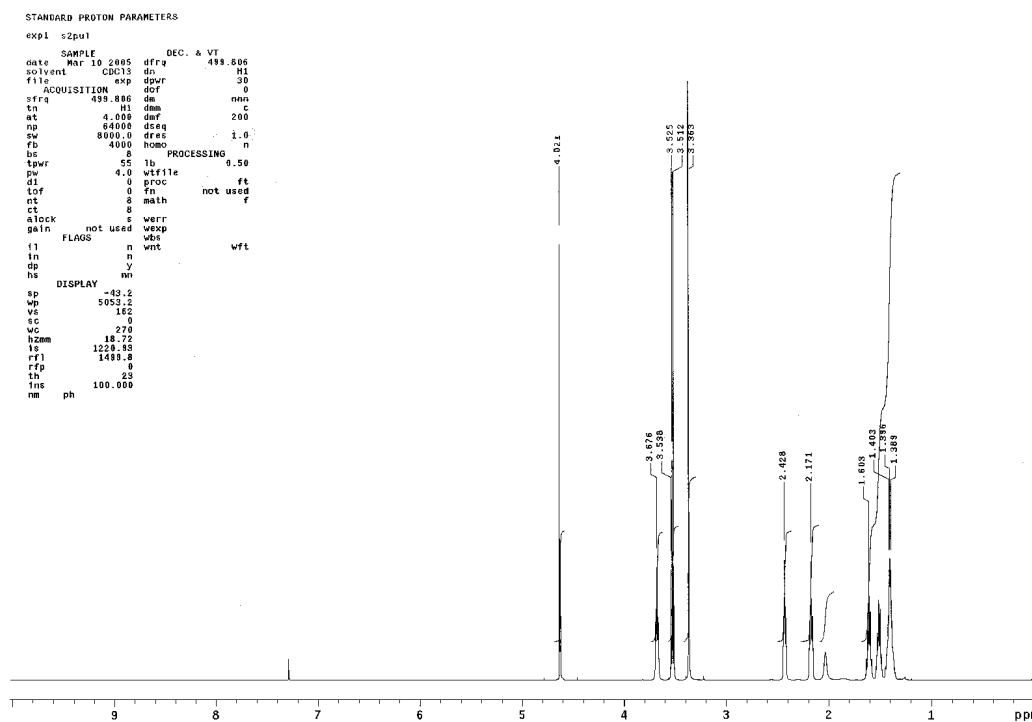

<sup>13</sup>C NMR

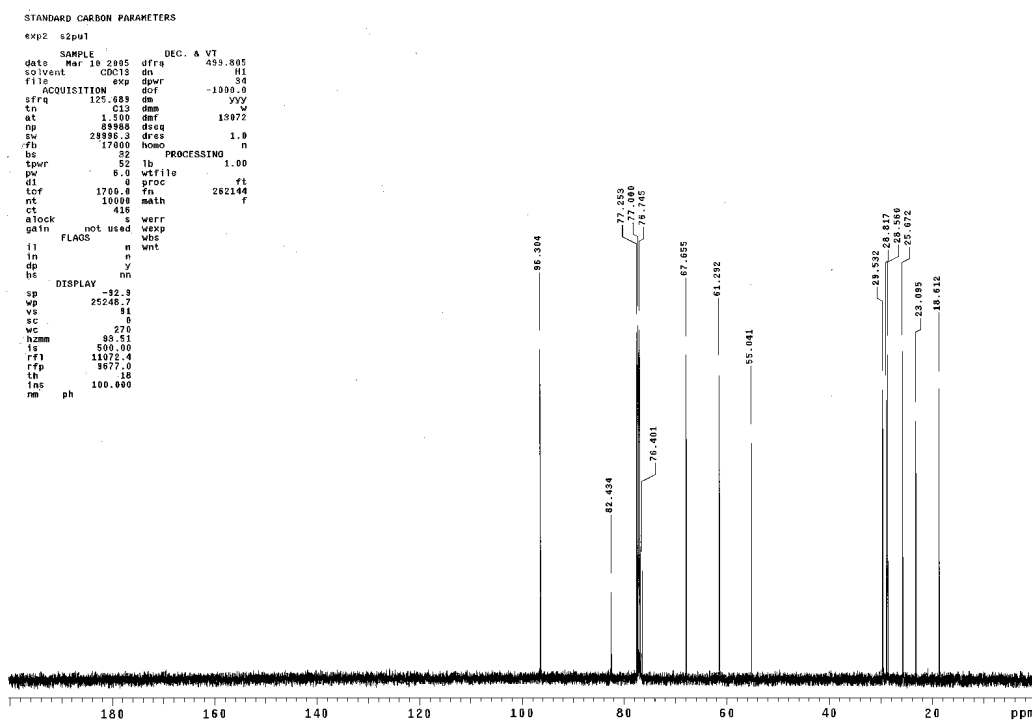

## DEPT

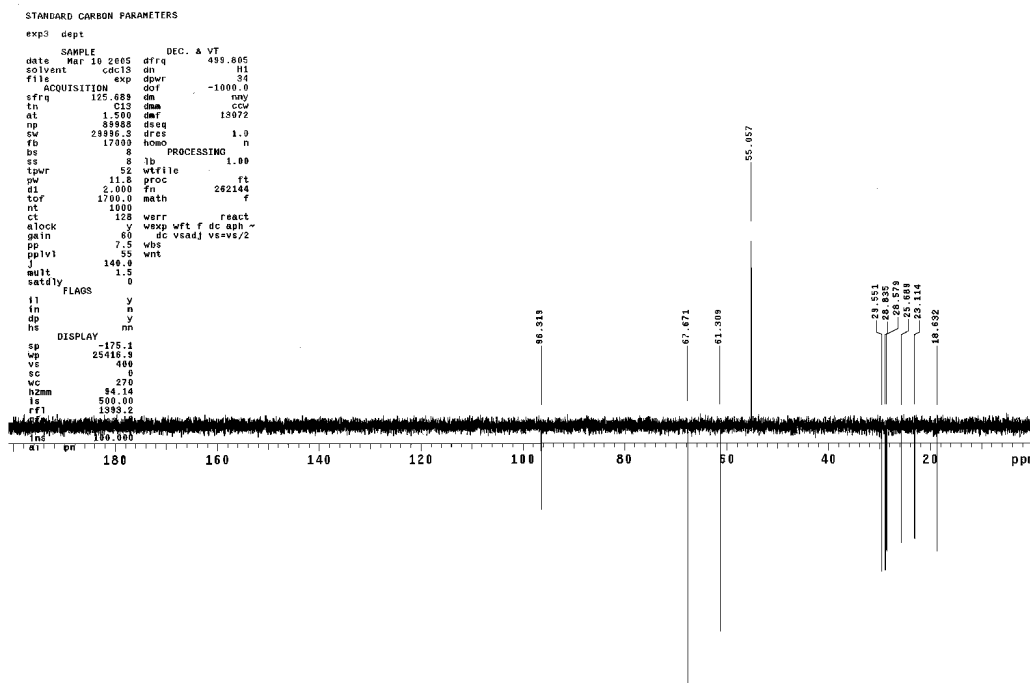

3 HO(CH<sub>2</sub>)<sub>2</sub>(CD<sub>2</sub>)<sub>2</sub>(CH<sub>2</sub>)<sub>6</sub>OMOM  
<sup>1</sup>H NMR

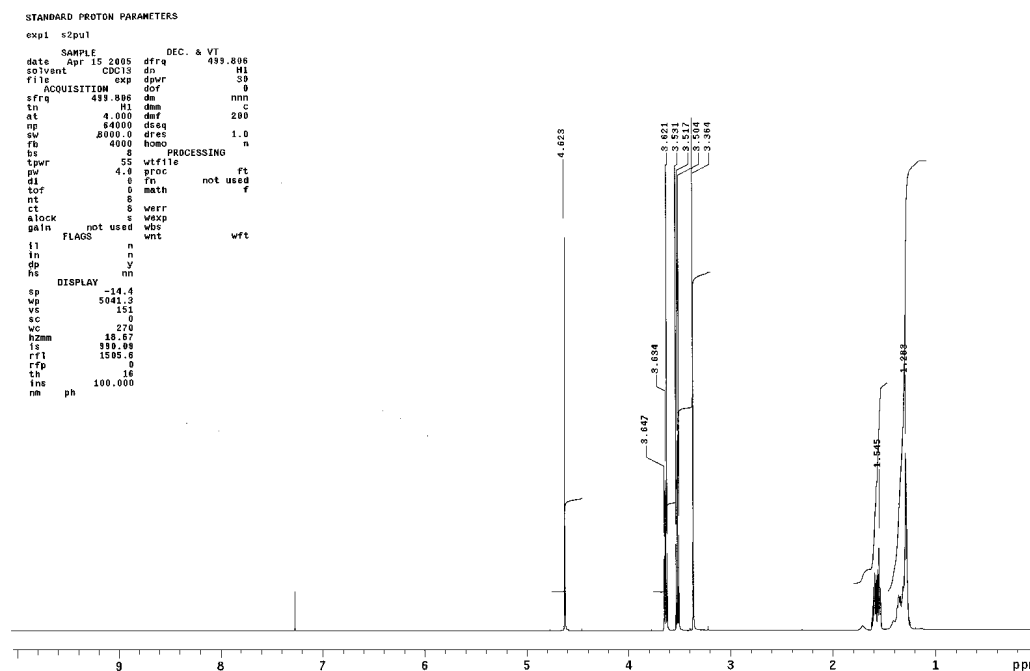



$^{13}\text{C}$  NMR

## STANDARD CARBON PARAMETERS

exp2 s2pu1

```

SAMPLE          DEC. & VT
date Apr 15 2005 dfrq 499.805
solvent CDCl3   dm  H1
file exp dpr 34
ACQUISITION     dof -1000.0
sfrq 125.688   dm  yyy
tn C13 dm  v
at 1.500 dmf 13072
np 89988 dseq
sw 29996.3 dres 1.0
fb 17000 homo n
bs 32 PROCESSING
tpwr 52 lb 1.00
pw 6.0 wfile
d1 0 proc ft
tof 1700.0 tn 262144
nt 10000 meth f
ct 1696
clock not used wexp
gain FLAGS n wnt
il n
in n
dp y
hs nn
DISPLAY
sp 28.6
vp 25159.2
vc 120
wc 0
hz 260
is 86.78
rfl 500.00
th 11074.7
ins 9677.19
ms 100.000
ph
```

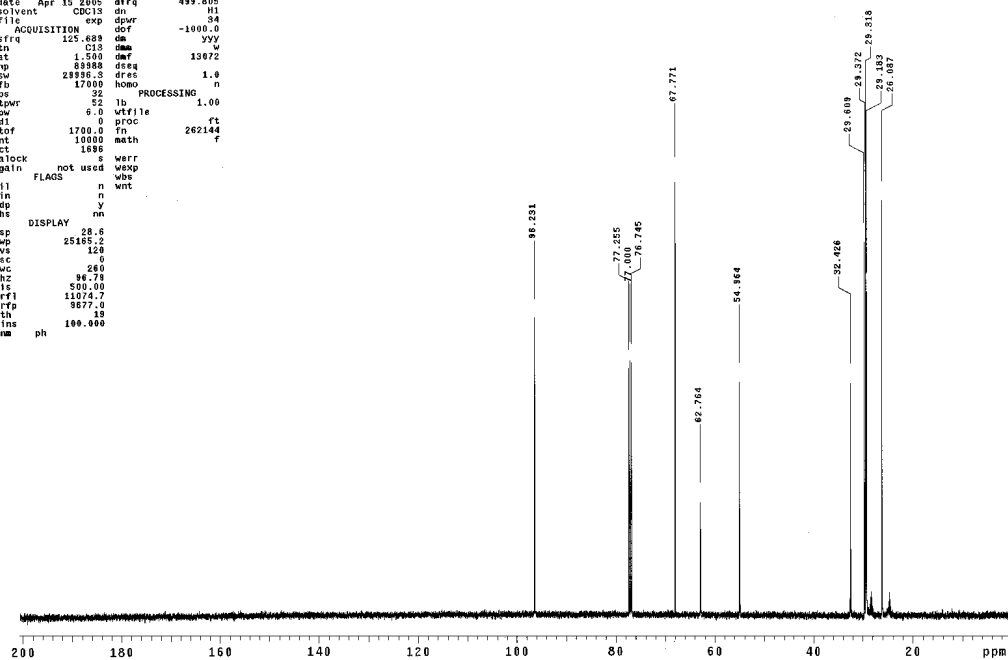

## DEPT

## STANDARD CARBON PARAMETERS

exp3 dept

```

SAMPLE          DEC. & VT
date Apr 15 2005 dfrq 499.805
solvent CDCl3   dm  H1
file exp dpr 34
ACQUISITION     dof -1000.0
sfrq 125.088   dm  nny
tn C13 dm  v
at 1.500 dmf 13072
np 89988 dseq
sw 29996.3 dres 1.0
fb 17000 homo n
bs 8 PROCESSING
es 8 lb 1.00
tpwr 52 wfile
pw 11.8 proc ft
d1 2.000 tn 262144
tcf 1700.0 meth f
nt 100000
ct 520 warr react
clock y wexp wft f dc apha ~
gain 60 dc vsadj vs=vs/2
pp1v1 55 wnt
j 140.0
mult 1.5
satdly 0
FLAGS
il y
in n
dp y
hs nn
DISPLAY
sp -26.2
vp 25159.2
vc 492
wc 0
hz 270
is 83.18
rfl 500.00
th 1257.5
ins 9677.19
ms 100.000
ph
```

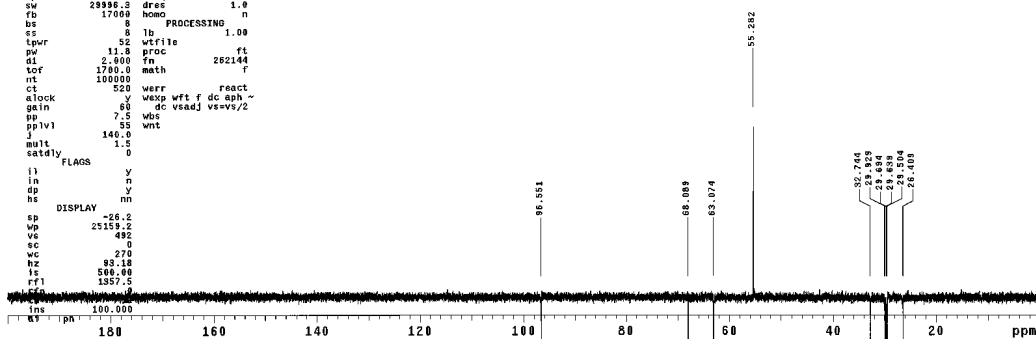

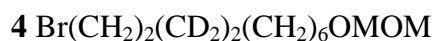
 $^1\text{H}$  NMR
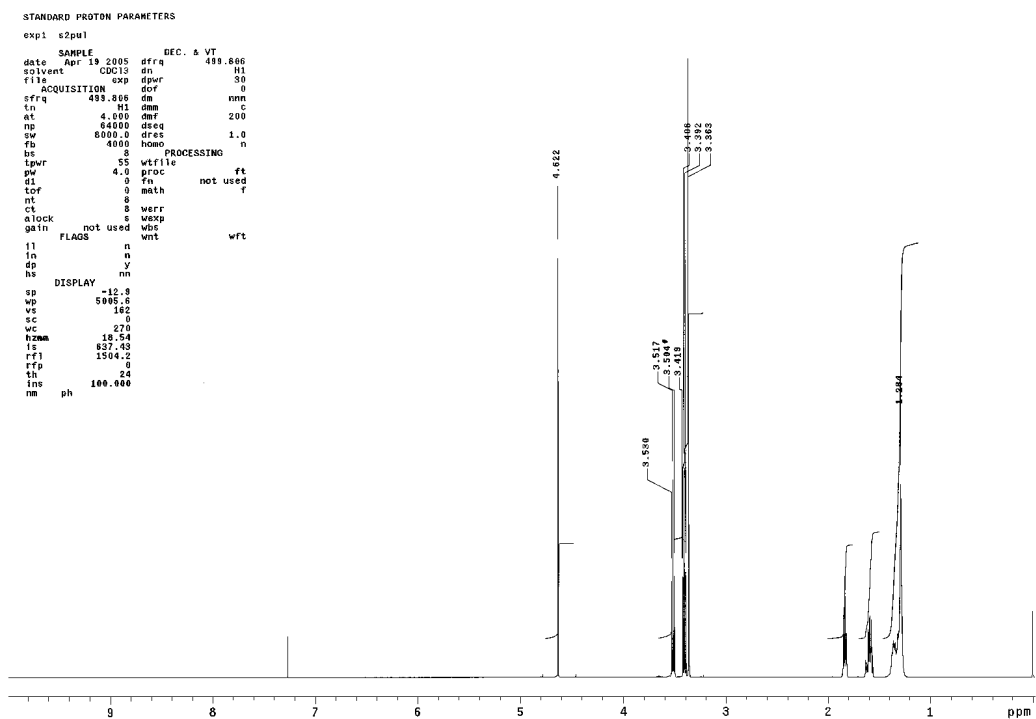
 $^{13}\text{C}$  NMR
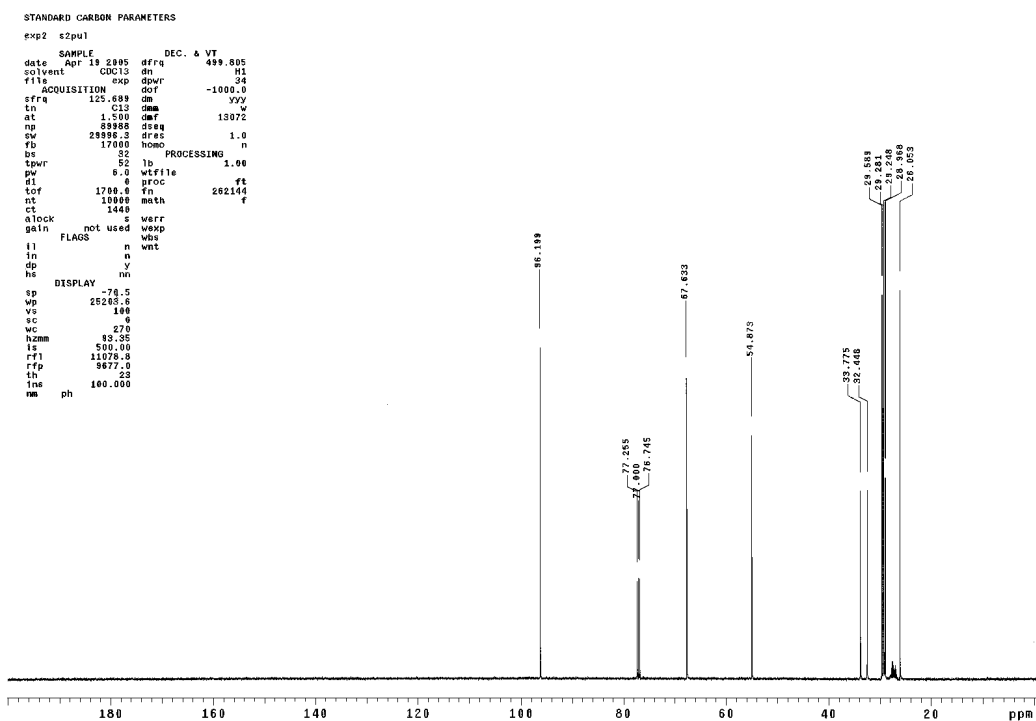

## DEPT

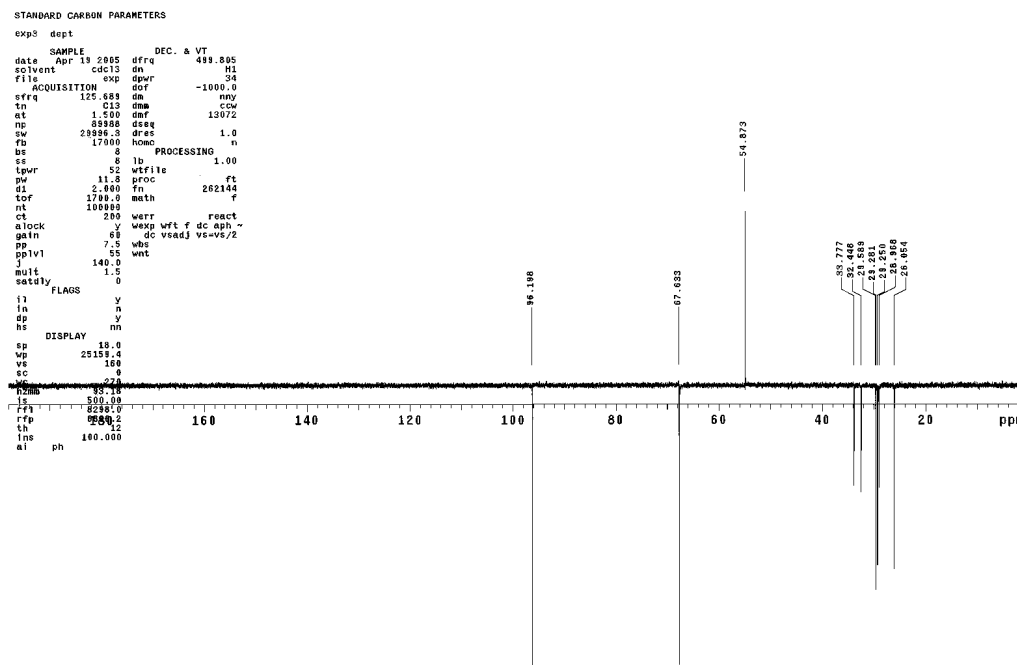

**6a**  $\text{CH}_3(\text{CH}_2)_2\text{CHOAcC}\equiv\text{C}$

$^1\text{H}$  NMR

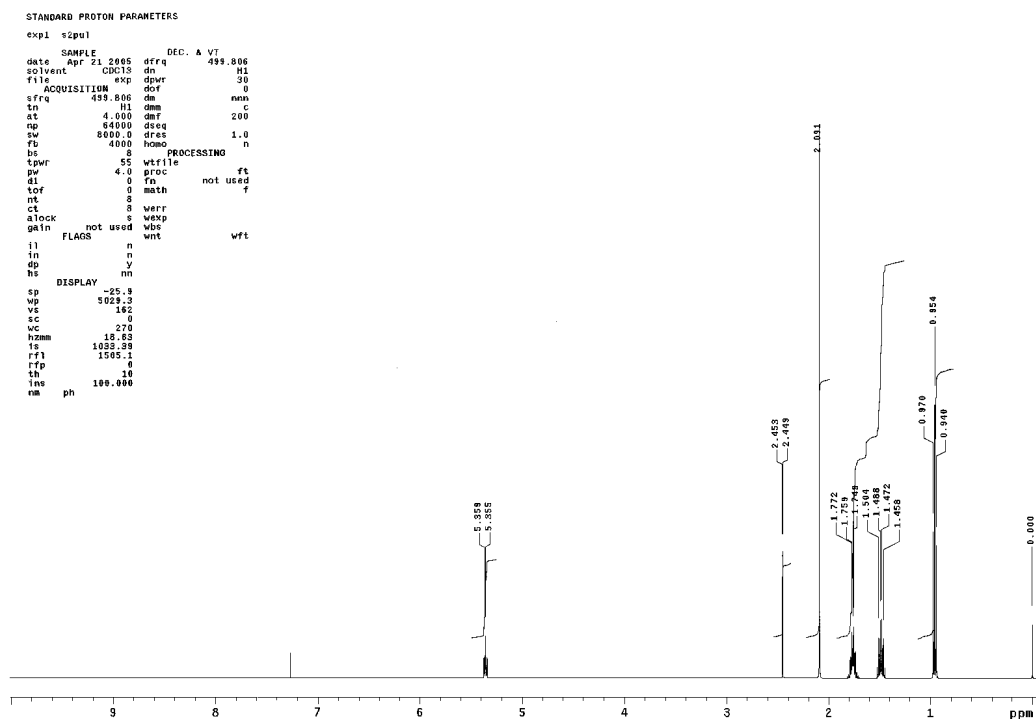

$^{13}\text{C}$  NMR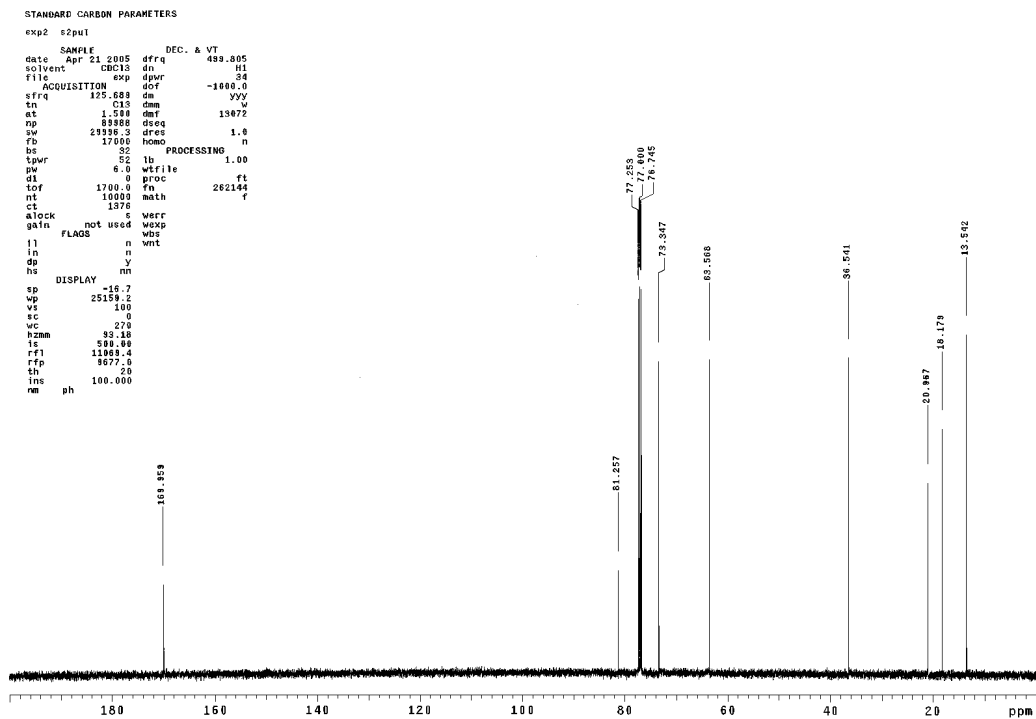

## DEPT 1(CH)

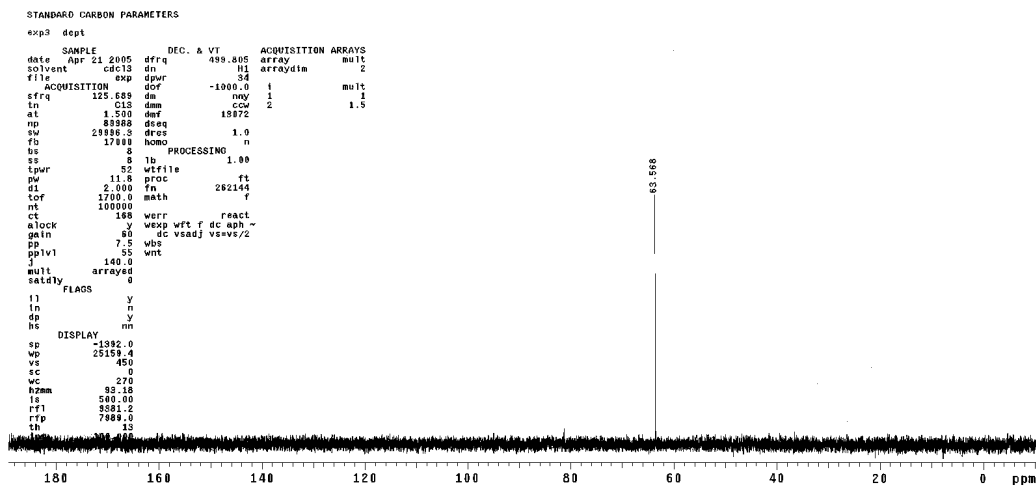

DEPT 2 (CH, CH<sub>3</sub>/CH<sub>2</sub>)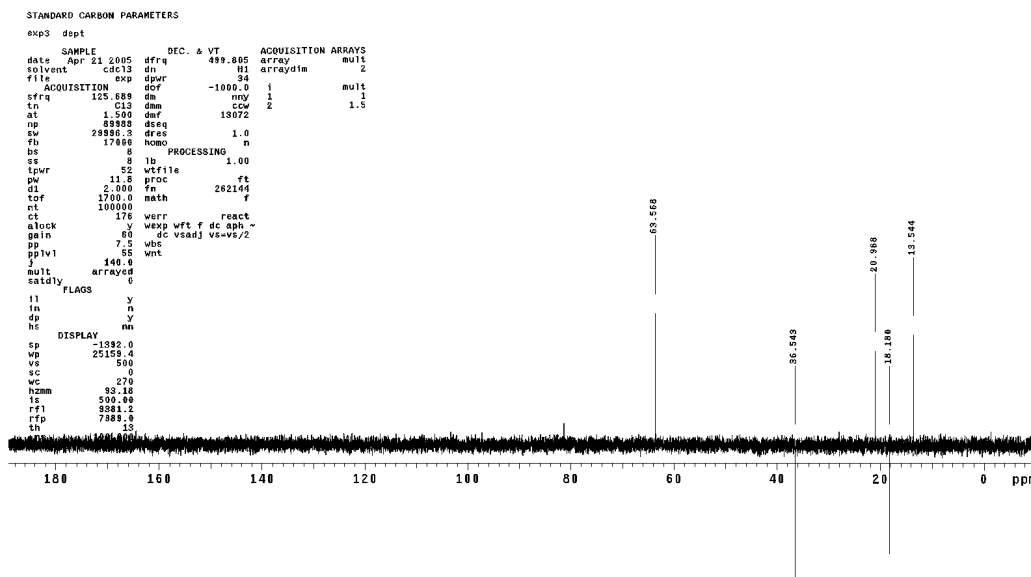

**6b** CH<sub>3</sub>CH<sub>2</sub>CHOAc CH<sub>2</sub>C≡C

<sup>1</sup>H NMR

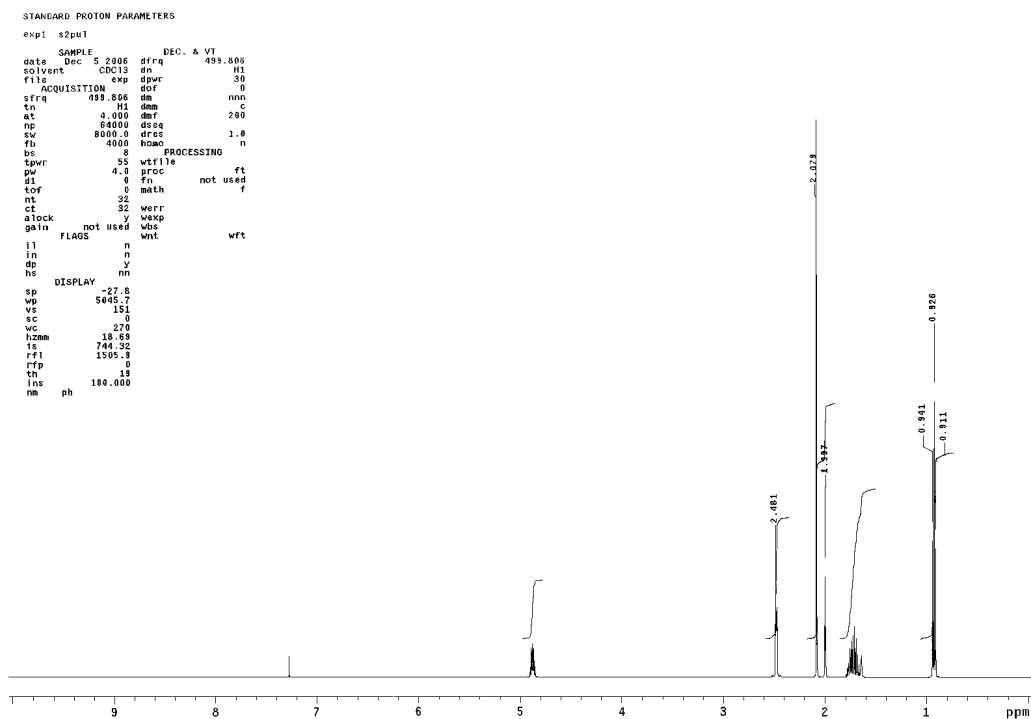

$^{13}\text{C}$  NMR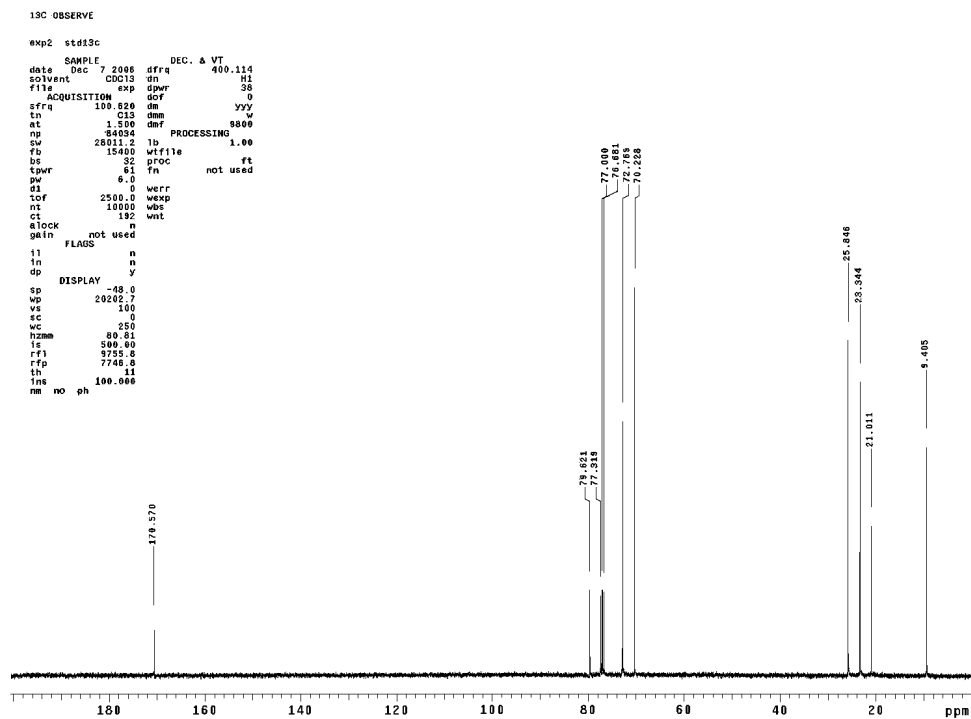

## DEPT 1(CH)

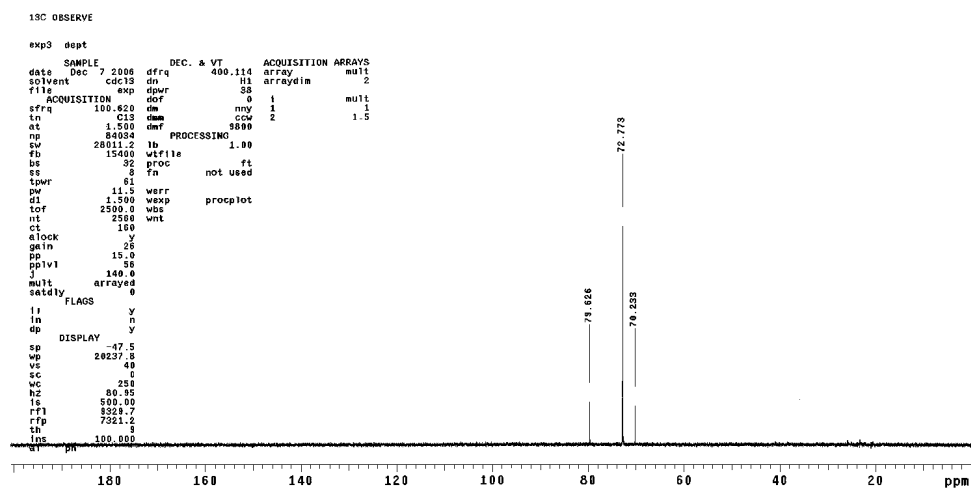

DEPT 2 (CH, CH<sub>3</sub>/CH<sub>2</sub>)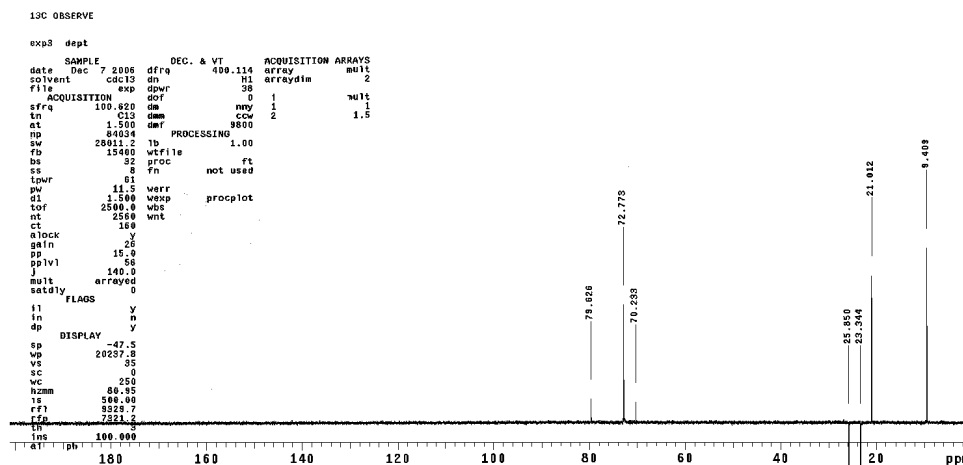

**7a** CH<sub>3</sub>(CH<sub>2</sub>)<sub>2</sub>CHOHC≡C(CH<sub>2</sub>)<sub>2</sub>(CD<sub>2</sub>)<sub>2</sub>(CH<sub>2</sub>)<sub>6</sub>OMOM  
<sup>1</sup>H NMR

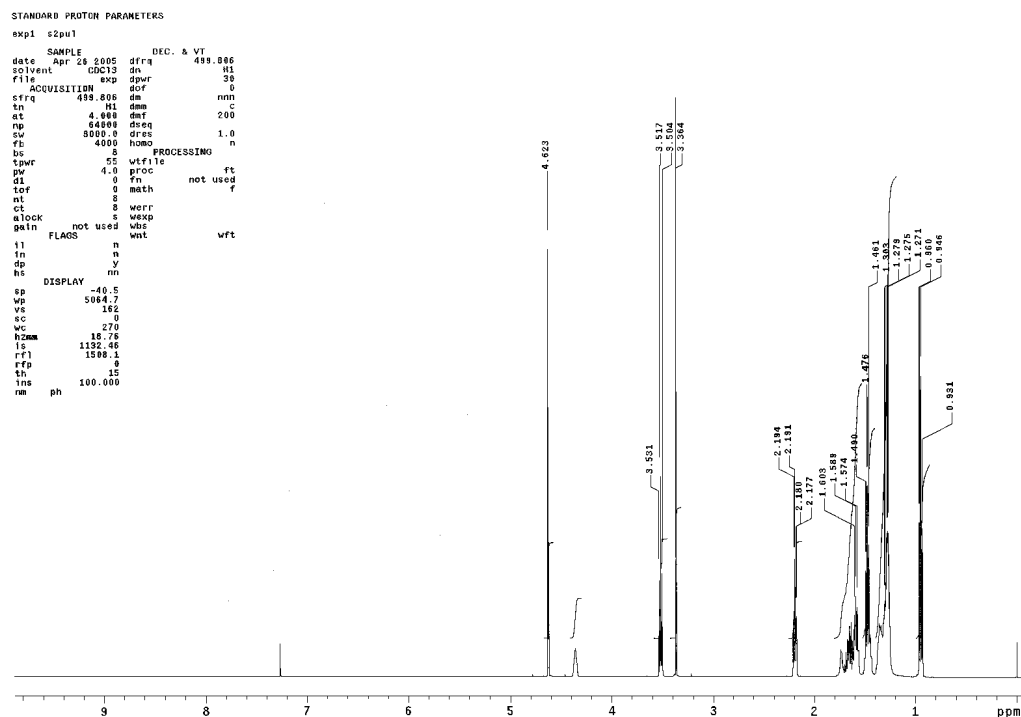

$^{13}\text{C}$  NMR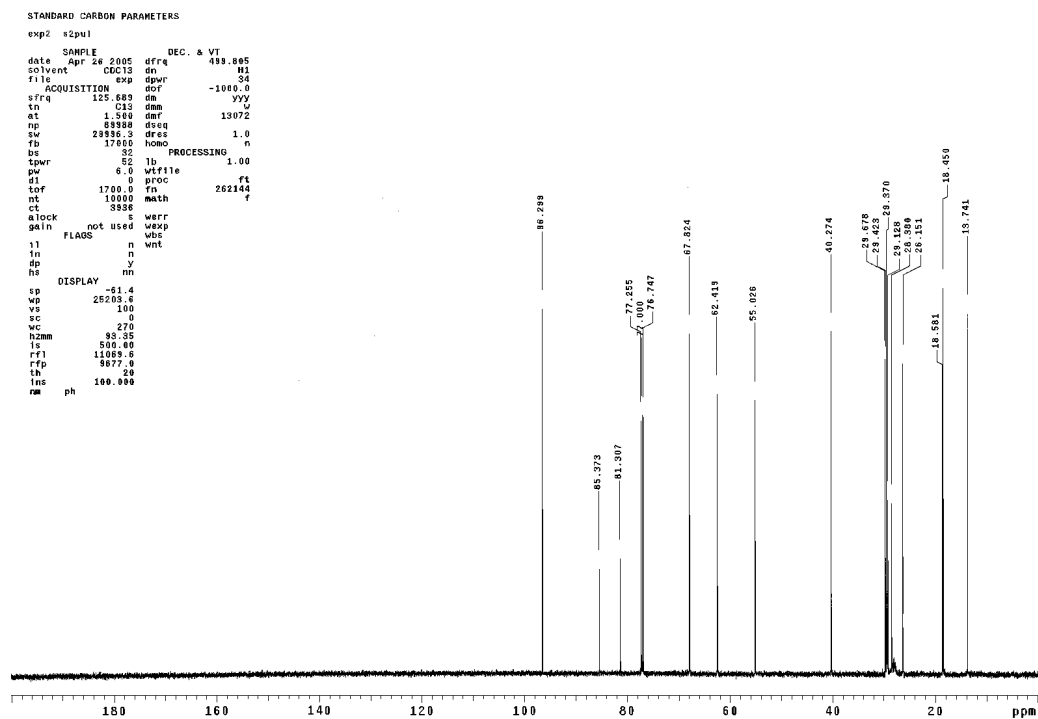

## DEPT 1(CH)

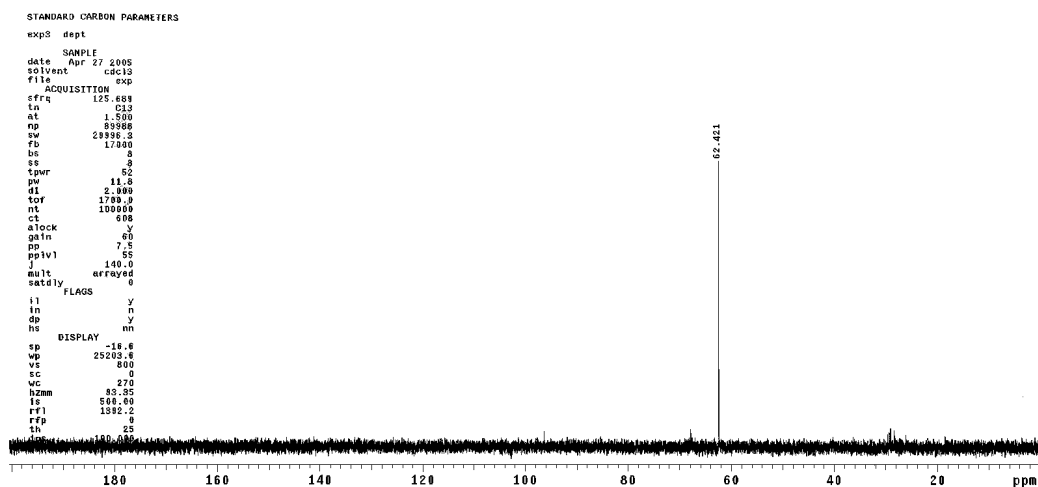



DEPT 2 (CH, CH<sub>3</sub>/CH<sub>2</sub>)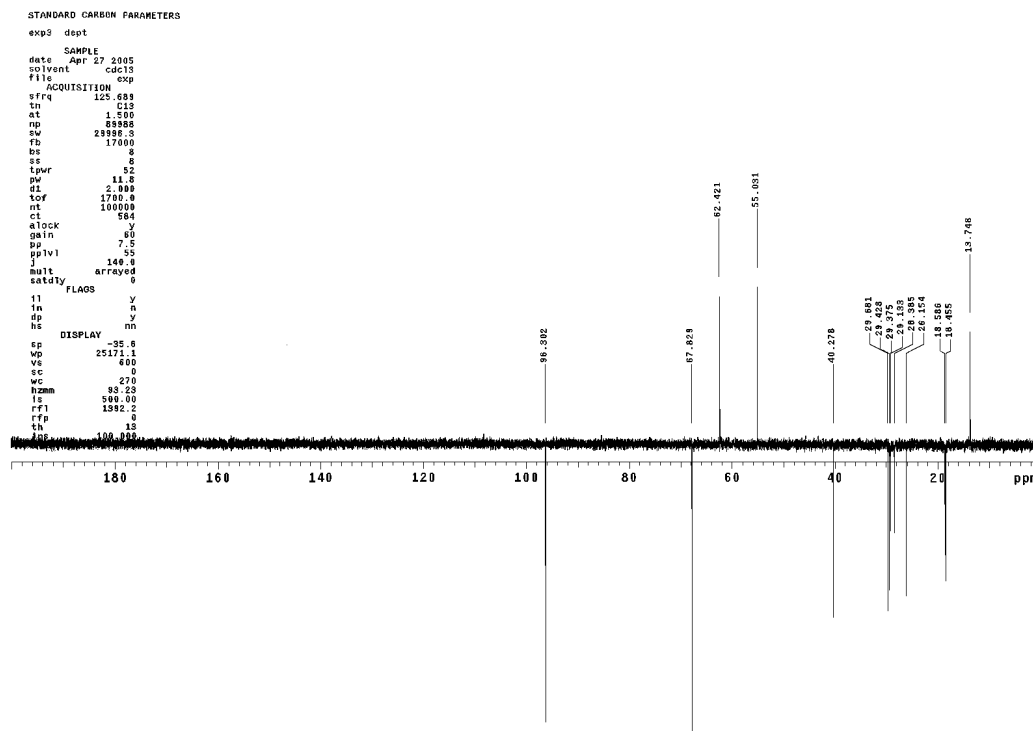

**7b** CH<sub>3</sub>CH<sub>2</sub>CHOHCH<sub>2</sub>C≡C(CH<sub>2</sub>)<sub>2</sub>(CD<sub>2</sub>)<sub>2</sub>(CH<sub>2</sub>)<sub>6</sub>OMOM  
<sup>1</sup>H NMR

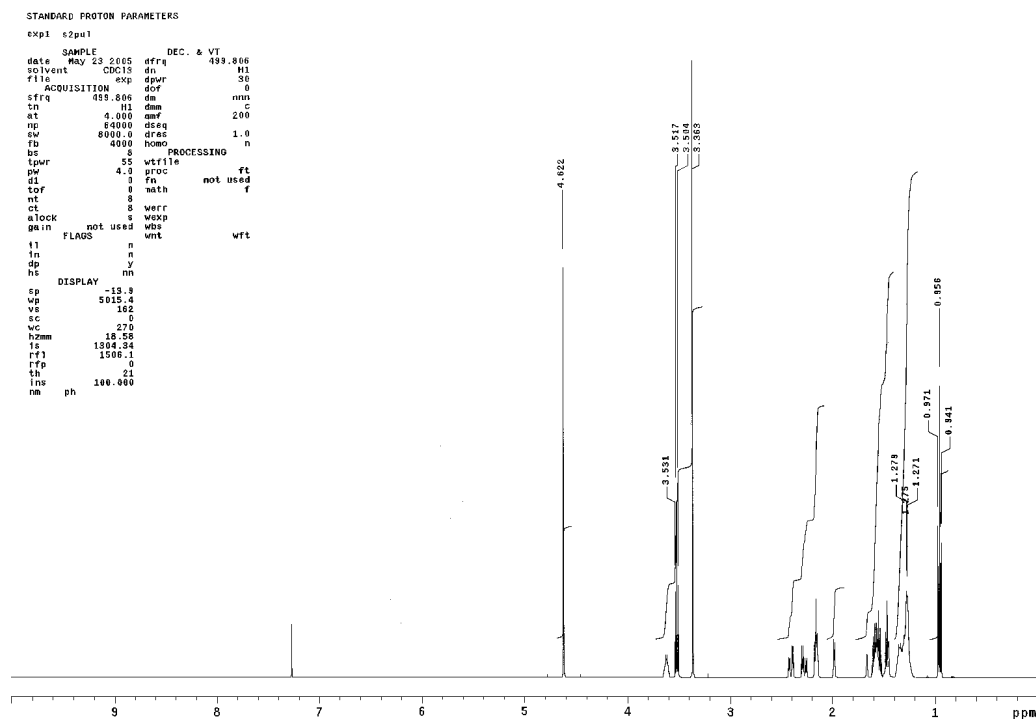

<sup>13</sup>C NMR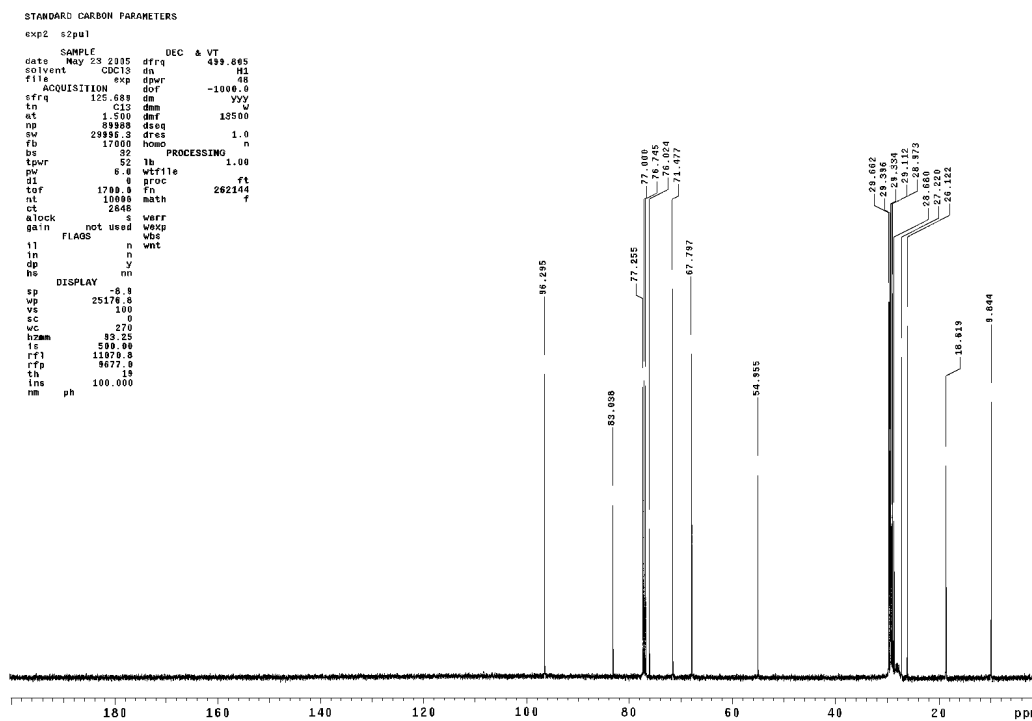

DEPT 2 (CH, CH<sub>3</sub>/CH<sub>2</sub>)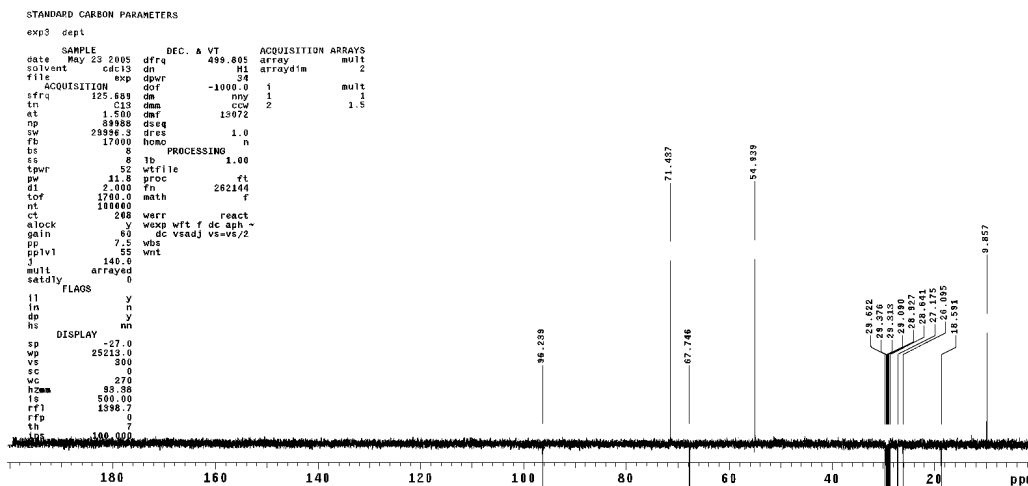

**8a** CH<sub>3</sub>(CH<sub>2</sub>)<sub>2</sub>CHOAcC≡C(CH<sub>2</sub>)<sub>2</sub>(CD<sub>2</sub>)<sub>2</sub>(CH<sub>2</sub>)<sub>6</sub>OMOM

<sup>1</sup>H NMR

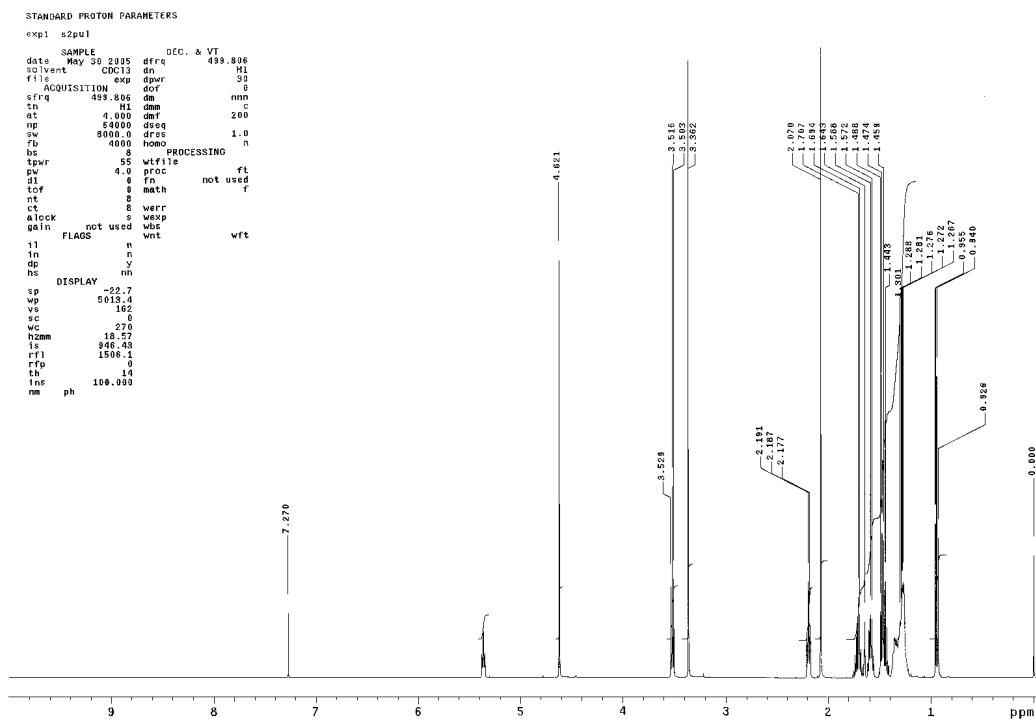

<sup>13</sup>C NMR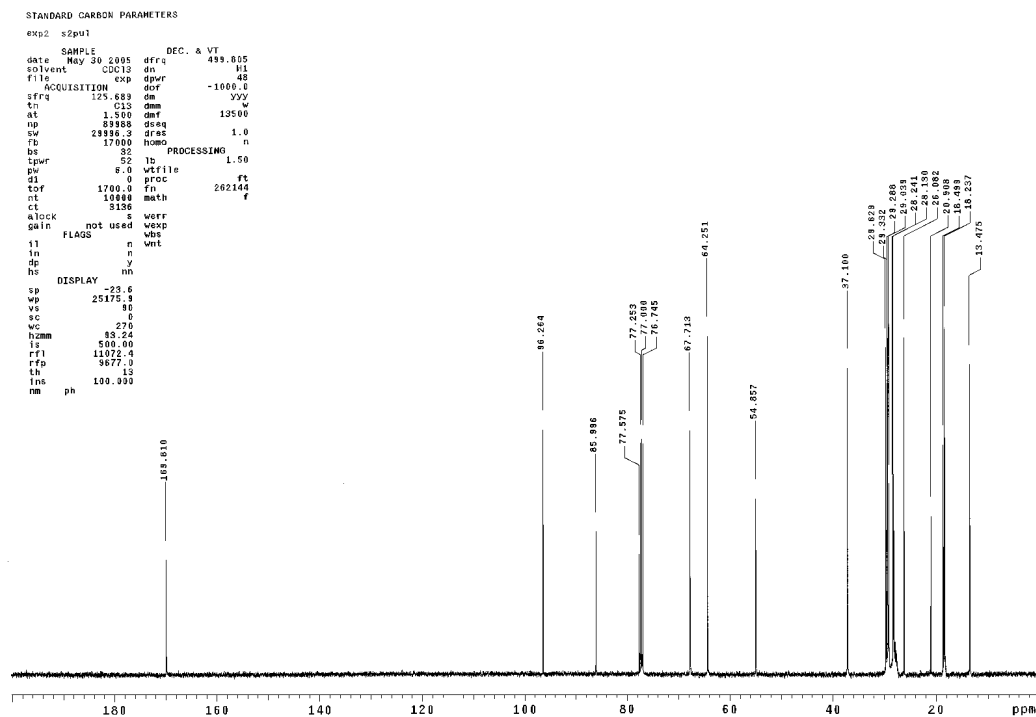

## DEPT 1(CH)

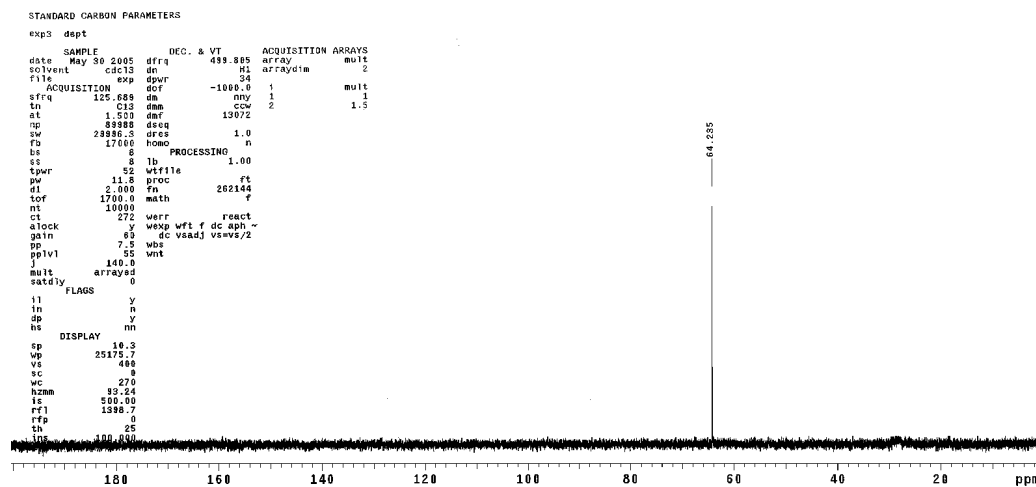

DEPT 2 (CH, CH<sub>3</sub>/CH<sub>2</sub>)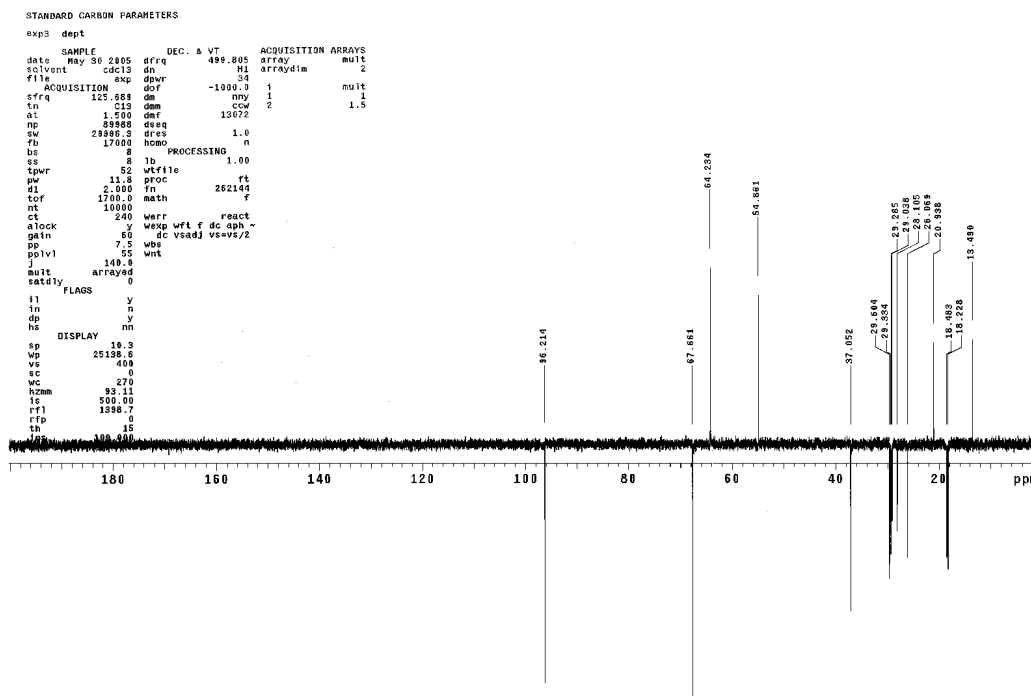

**9a** CH<sub>3</sub>(CH<sub>2</sub>)<sub>2</sub>CHOHCH<sub>2</sub>CH<sub>2</sub>(CH<sub>2</sub>)<sub>2</sub>(CD<sub>2</sub>)<sub>2</sub>(CH<sub>2</sub>)<sub>6</sub>OMOM  
<sup>1</sup>H NMR

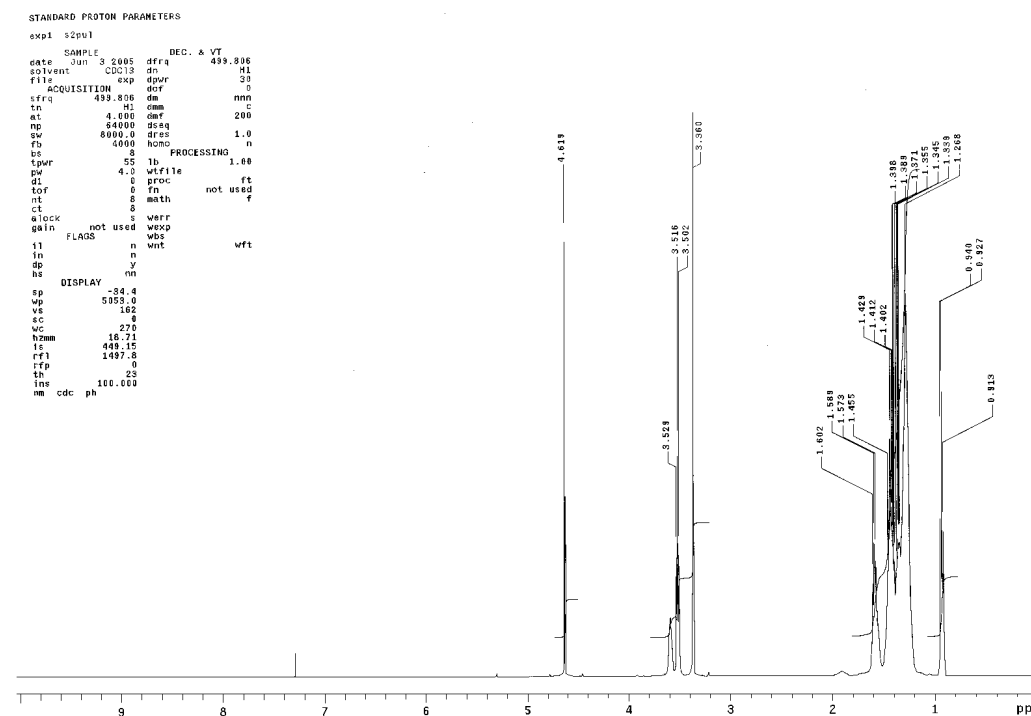

$^{13}\text{C}$  NMR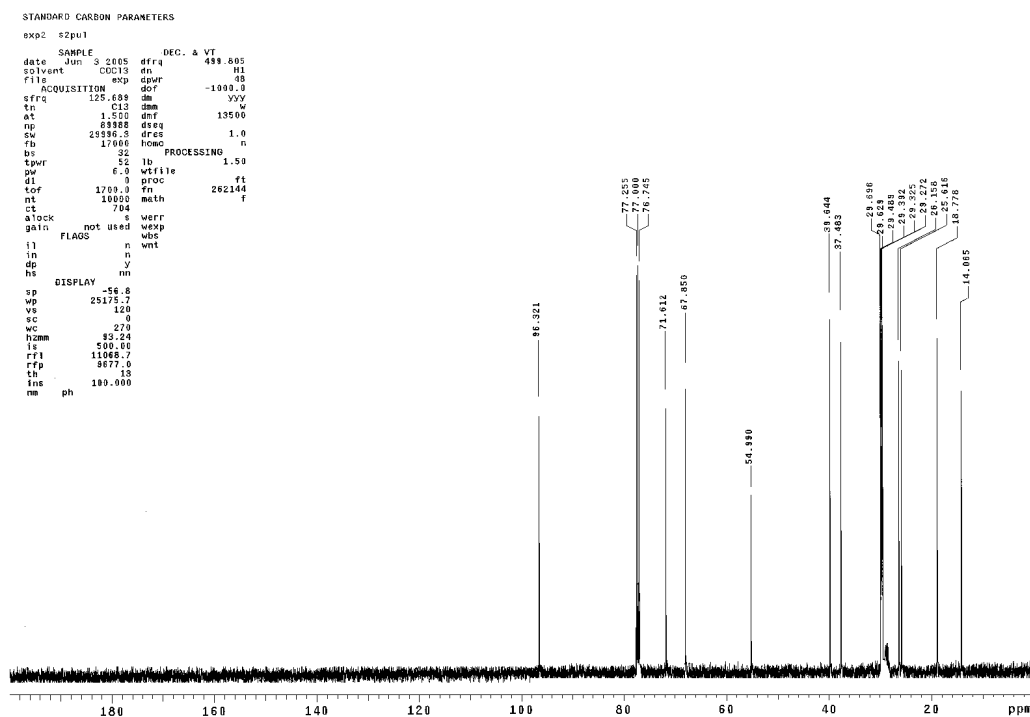

## DEPT 1(CH)

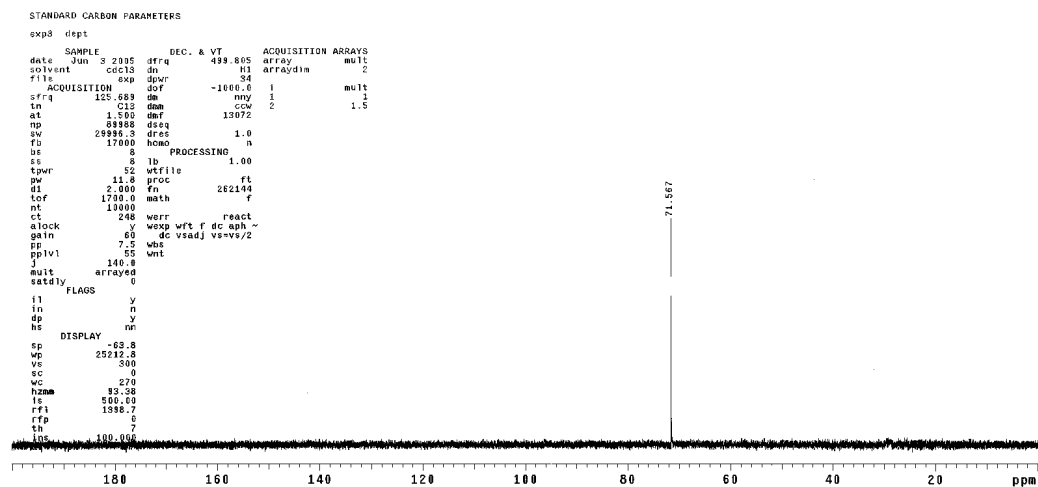

DEPT 2 (CH, CH<sub>3</sub>/CH<sub>2</sub>)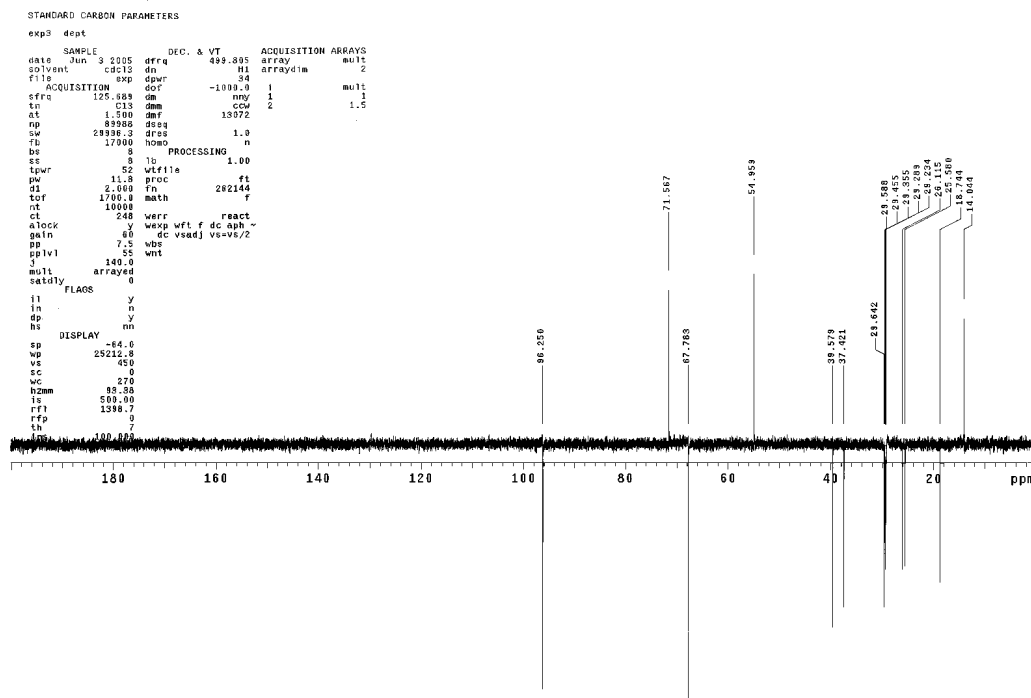

**9b** CH<sub>3</sub>CH<sub>2</sub>CHOHCH<sub>2</sub>CH<sub>2</sub>CH<sub>2</sub>(CH<sub>2</sub>)<sub>2</sub>(CD<sub>2</sub>)<sub>2</sub>(CH<sub>2</sub>)<sub>6</sub>OMOM  
<sup>1</sup>H NMR

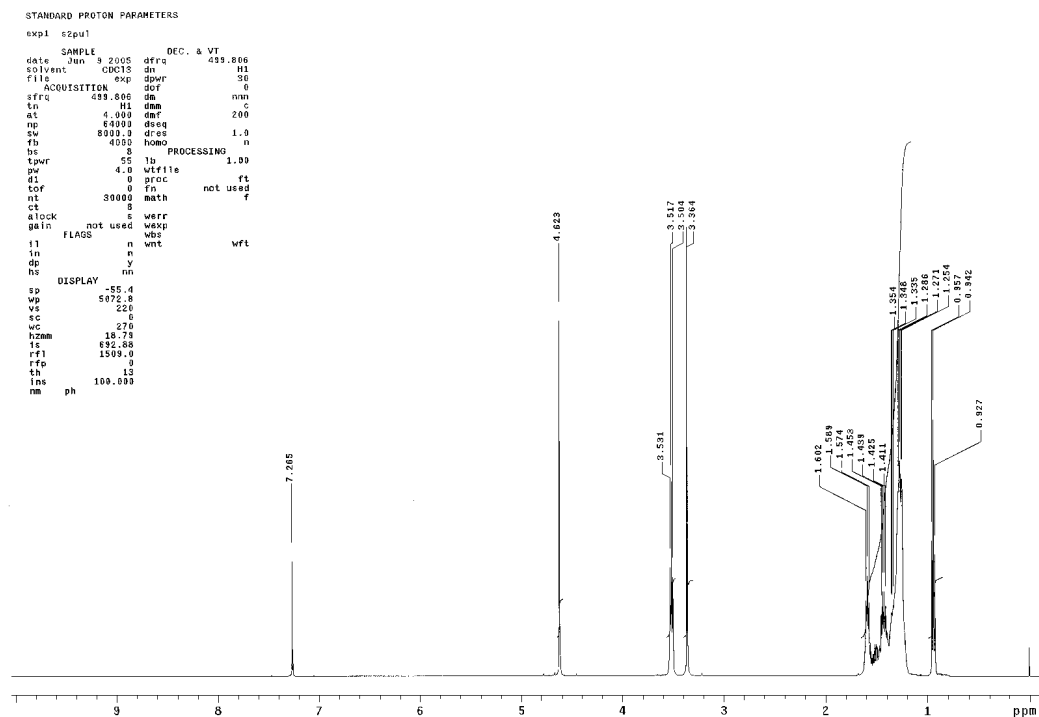

<sup>13</sup>C NMR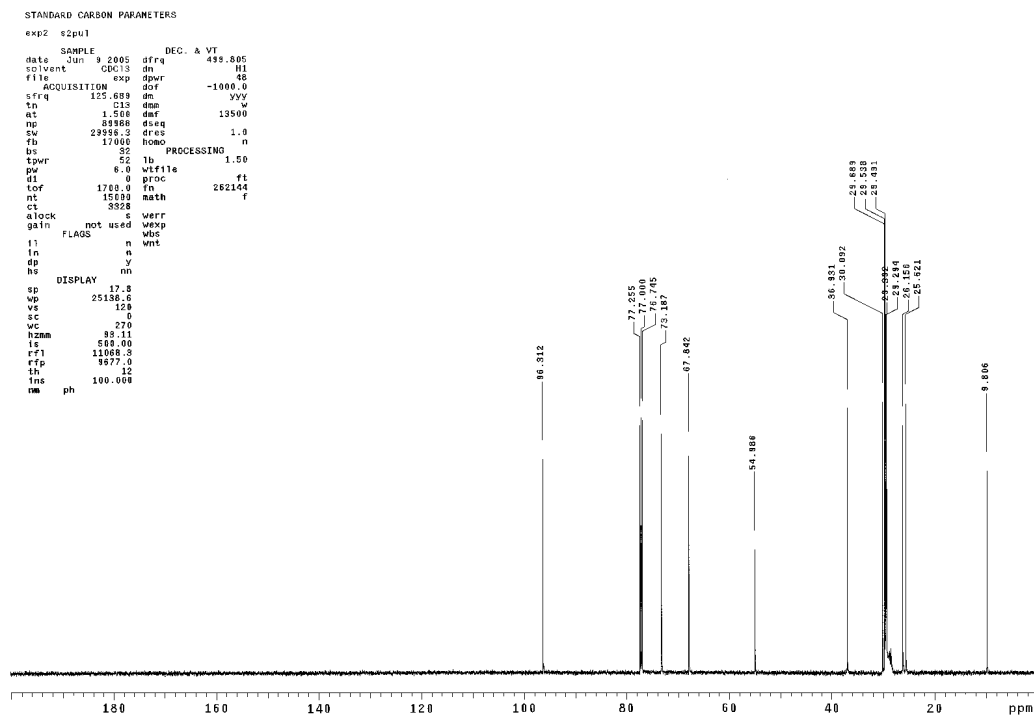

## DEPT 1(CH)

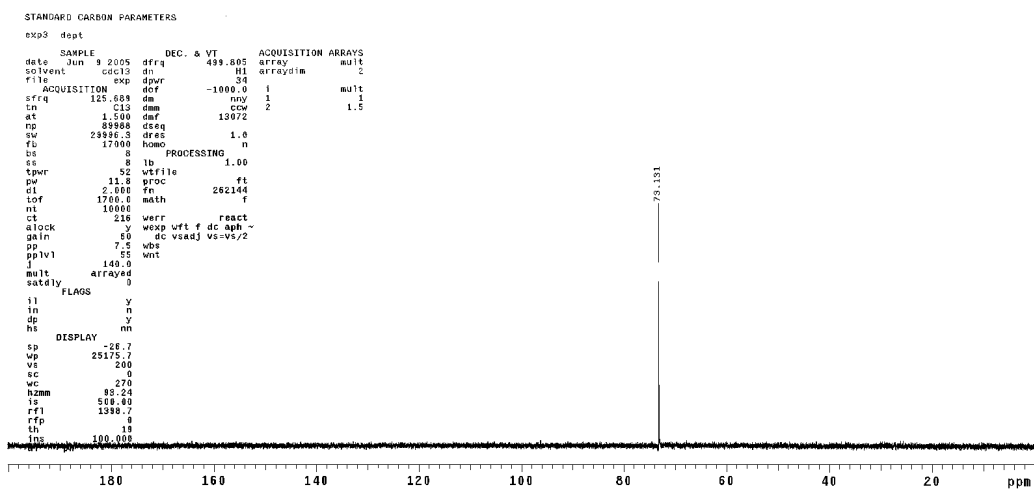



DEPT 2 (CH, CH<sub>3</sub>/CH<sub>2</sub>)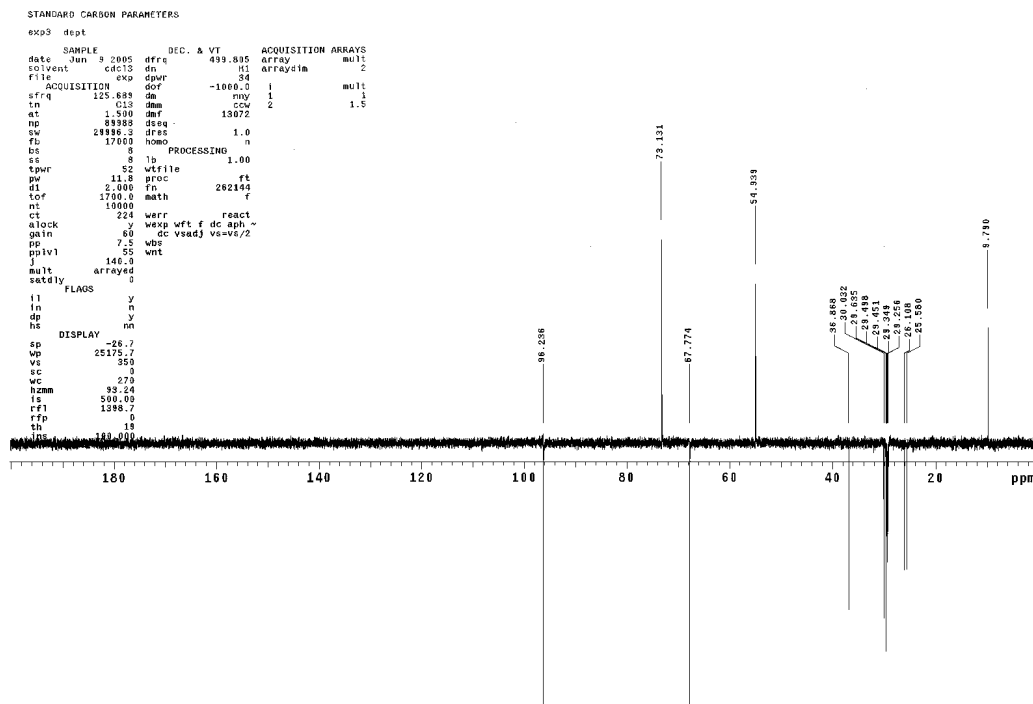

**10a** CH<sub>3</sub>(CH<sub>2</sub>)<sub>2</sub>CHOMsCH<sub>2</sub>CH<sub>2</sub>(CH<sub>2</sub>)<sub>2</sub>(CD<sub>2</sub>)<sub>2</sub>(CH<sub>2</sub>)<sub>6</sub>OMOM  
<sup>1</sup>H NMR

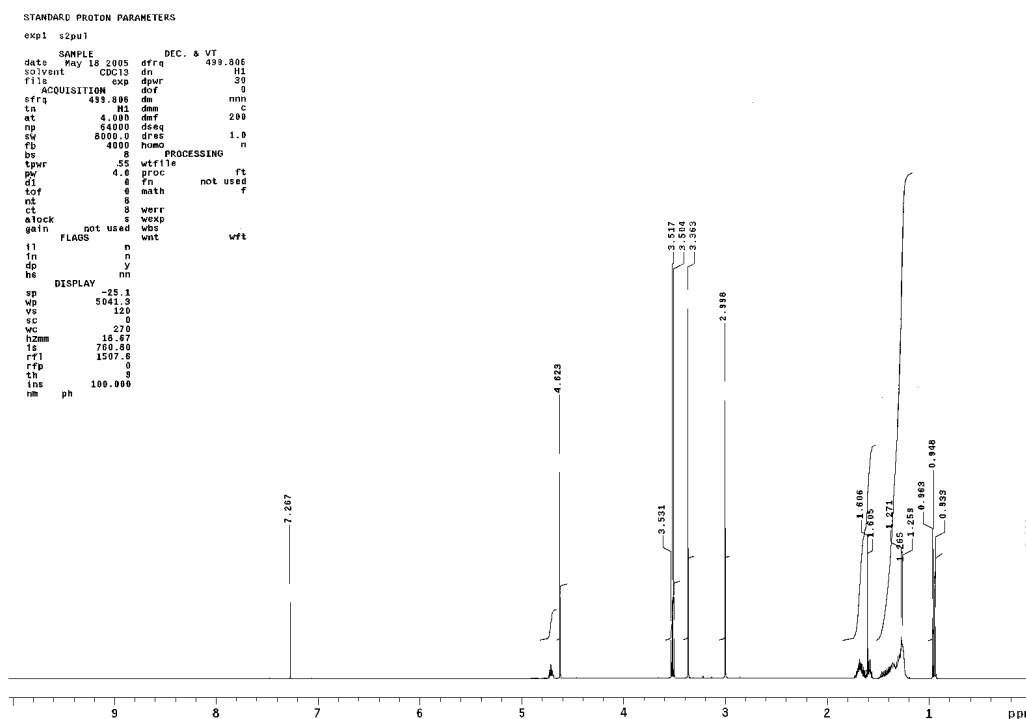

<sup>13</sup>C NMR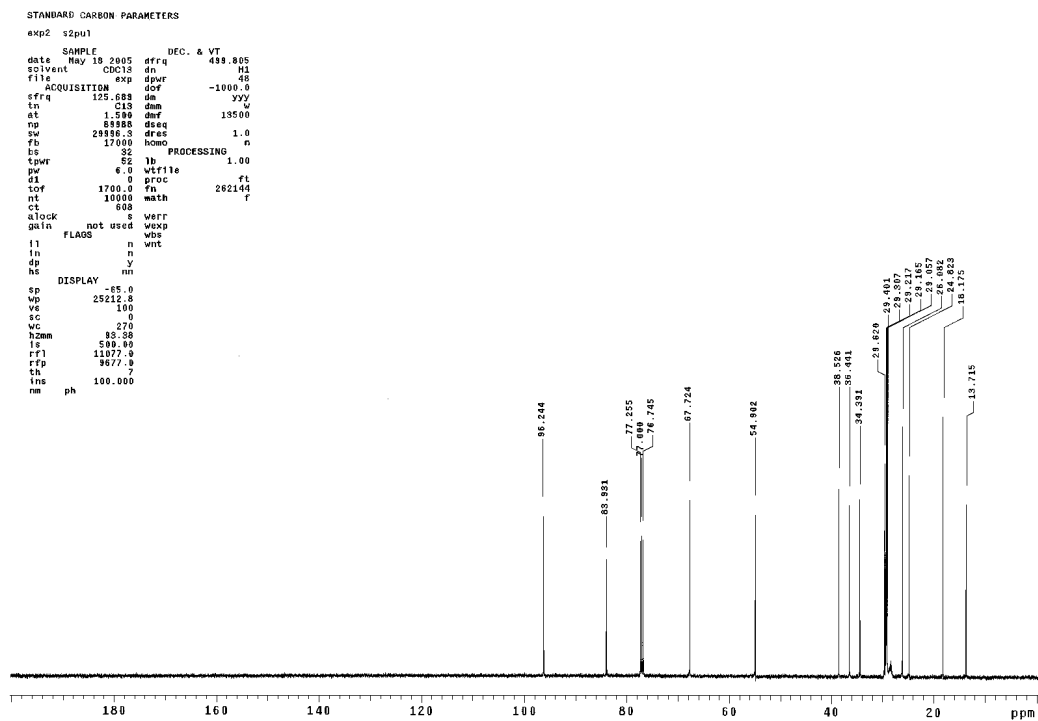

## DEPT 1(CH)

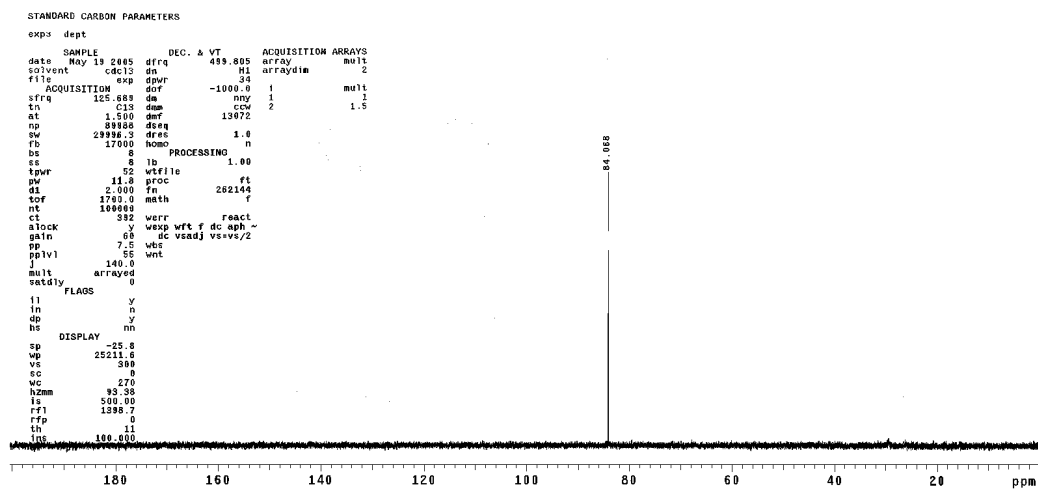

DEPT 2 (CH, CH<sub>3</sub>/CH<sub>2</sub>)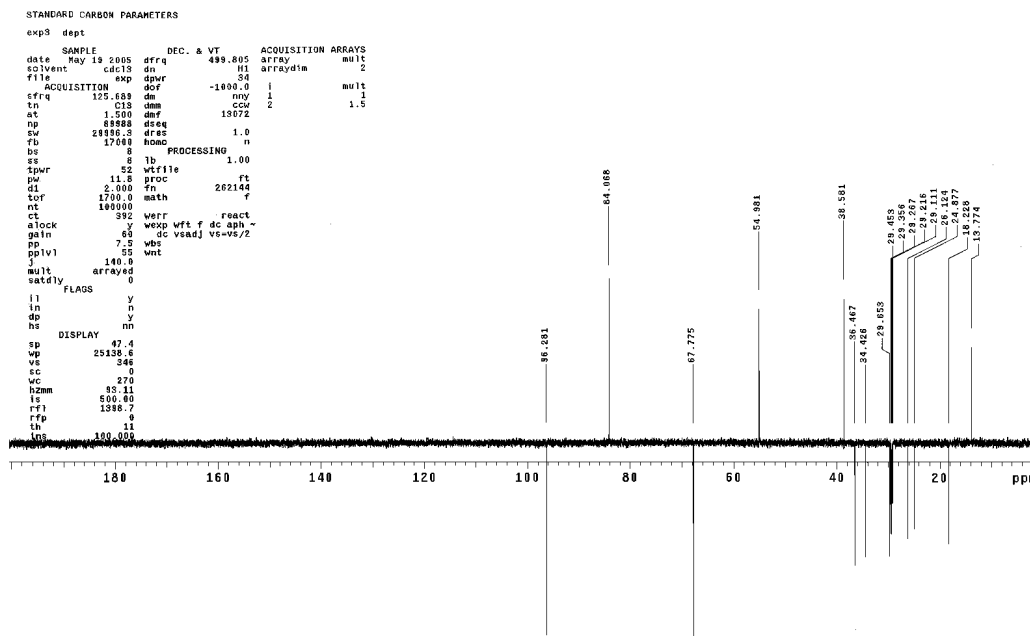

**10b** CH<sub>3</sub>CH<sub>2</sub>CHOMsCH<sub>2</sub>CH<sub>2</sub>CH<sub>2</sub>(CH<sub>2</sub>)<sub>2</sub>(CD<sub>2</sub>)<sub>2</sub>(CH<sub>2</sub>)<sub>6</sub>OMOM  
<sup>1</sup>H NMR

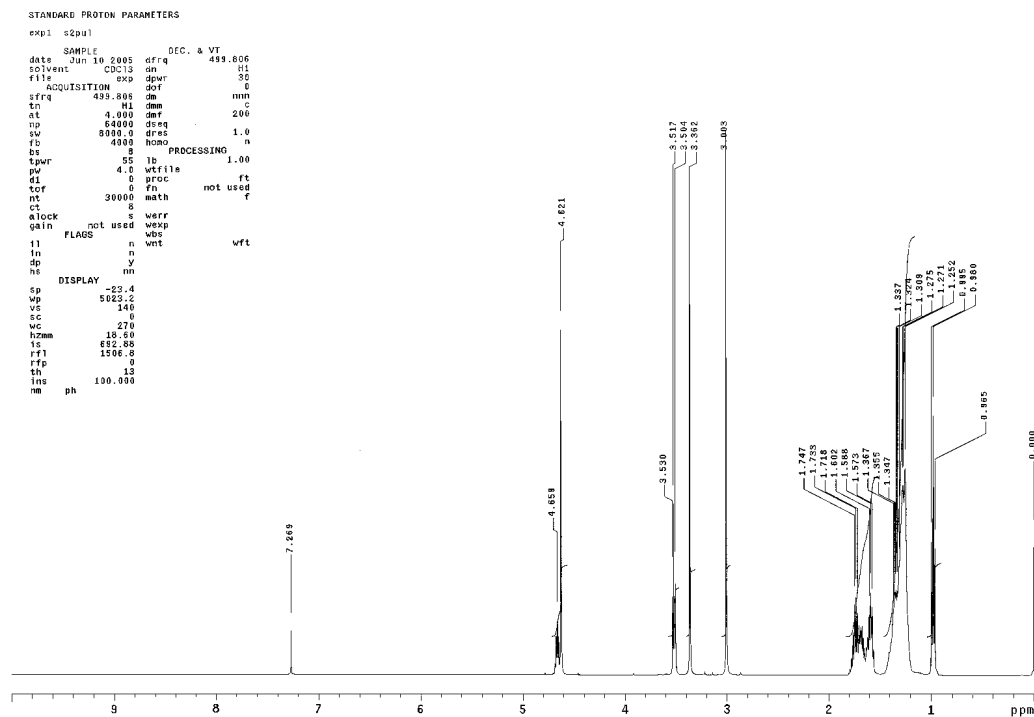

$^{13}\text{C}$  NMR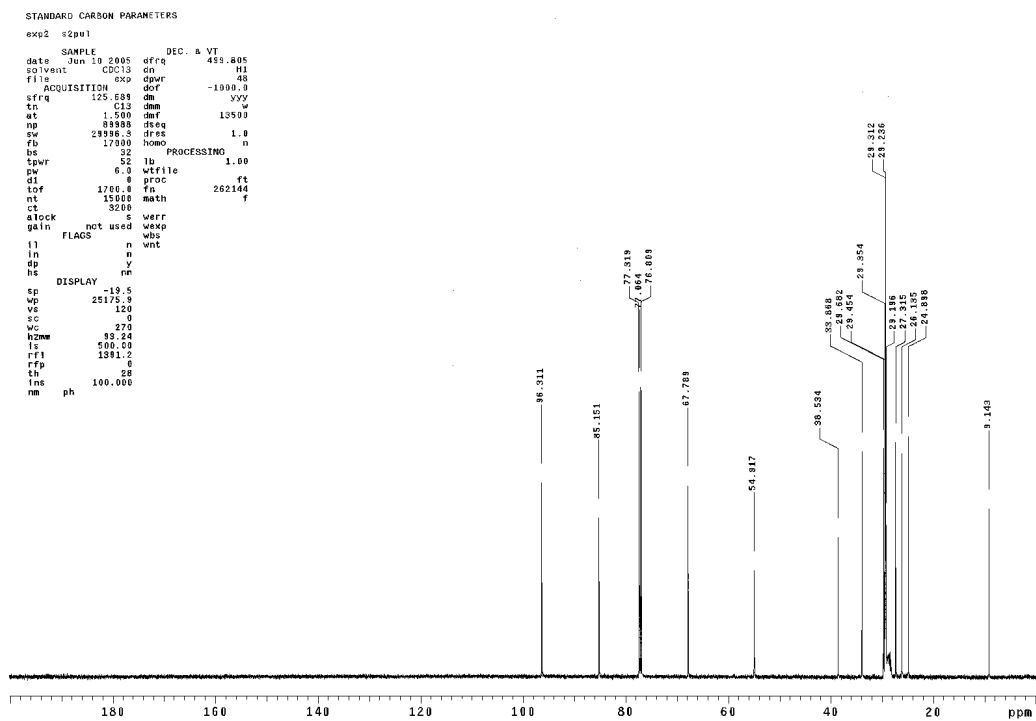

## DEPT 1(CH)

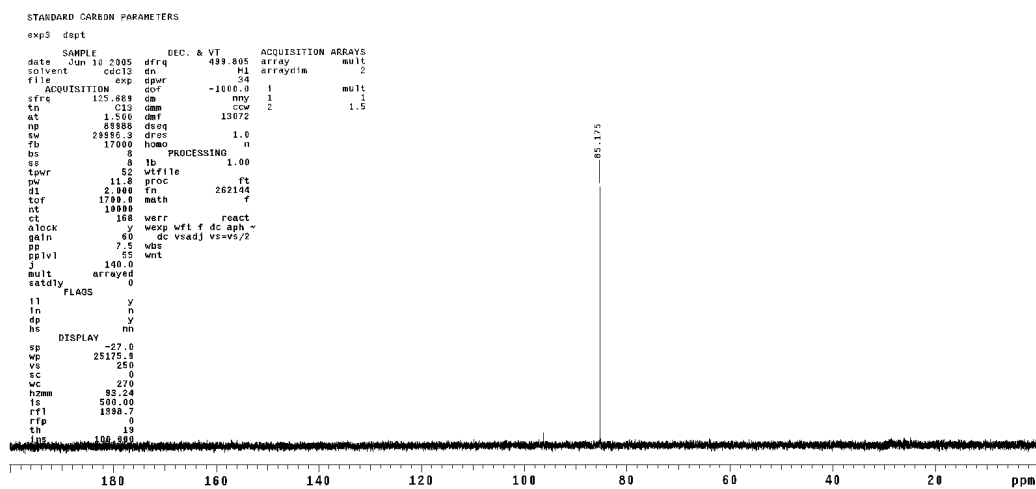

DEPT 2 (CH, CH<sub>3</sub>/CH<sub>2</sub>)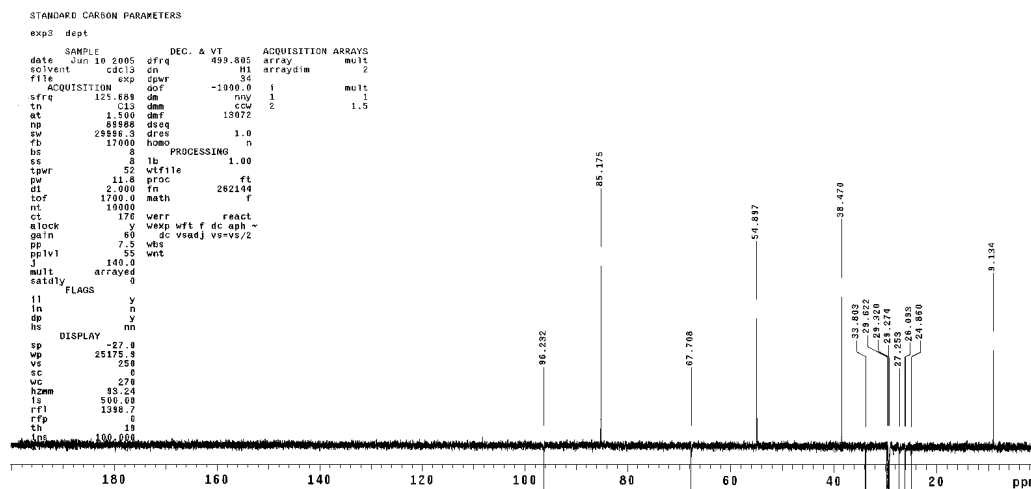

**11a** CH<sub>3</sub>(CH<sub>2</sub>)<sub>2</sub>CHDCH<sub>2</sub>CH<sub>2</sub>(CH<sub>2</sub>)<sub>2</sub>(CD<sub>2</sub>)<sub>2</sub>(CH<sub>2</sub>)<sub>6</sub>OMOM  
<sup>1</sup>H NMR

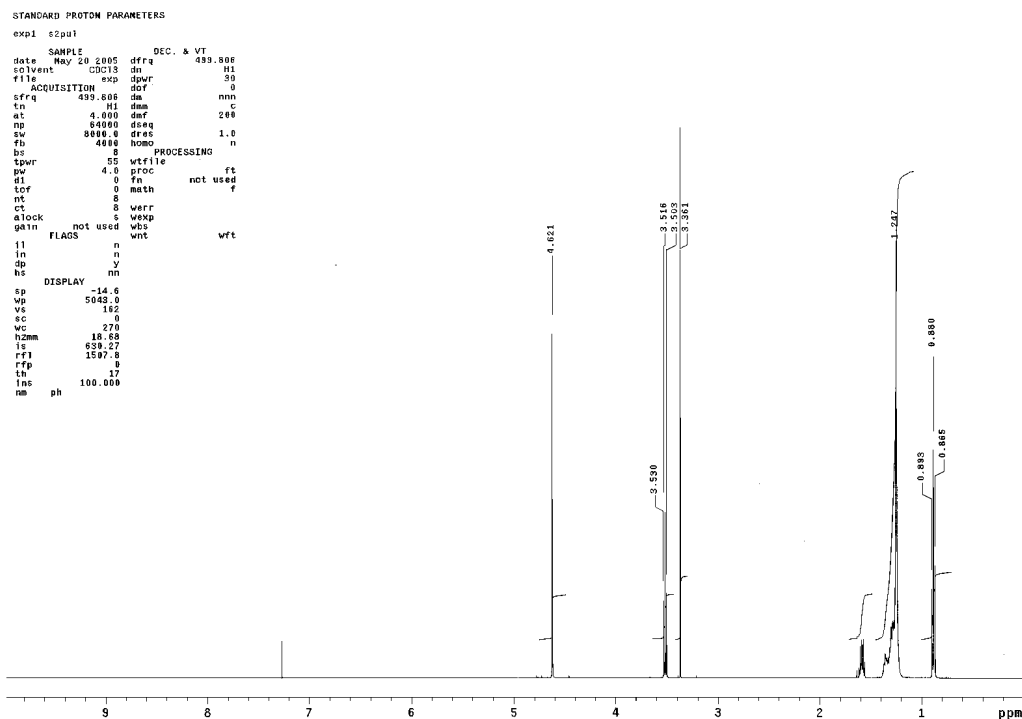

$^{13}\text{C}$  NMR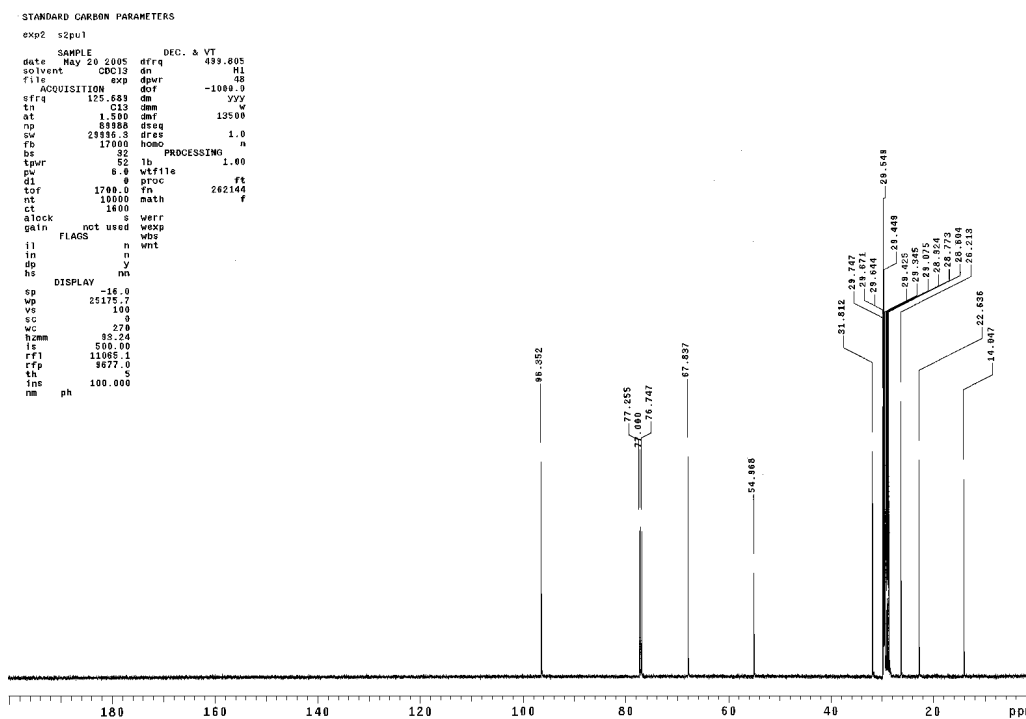

## DEPT 1(CH)

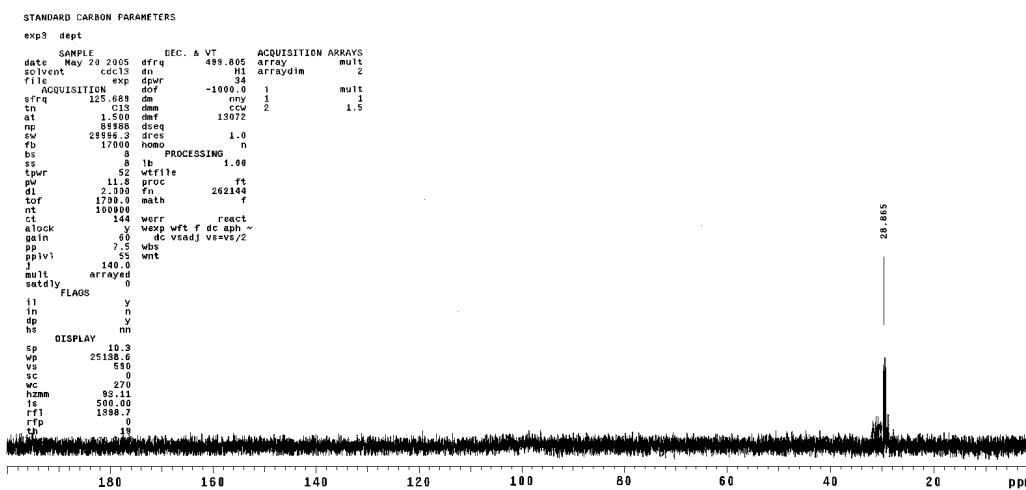

DEPT 2 (CH, CH<sub>3</sub>/CH<sub>2</sub>)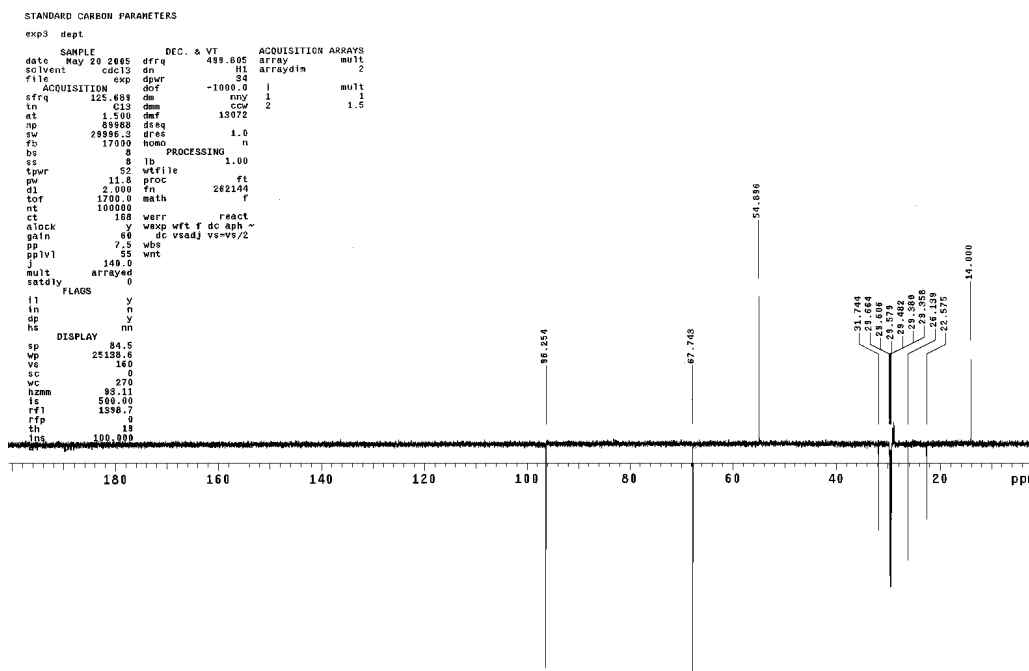

**11b** CH<sub>3</sub>CH<sub>2</sub>CHDCH<sub>2</sub>CH<sub>2</sub>CH<sub>2</sub>(CH<sub>2</sub>)<sub>2</sub>(CD<sub>2</sub>)<sub>2</sub>(CH<sub>2</sub>)<sub>6</sub>OMOM  
<sup>1</sup>H NMR

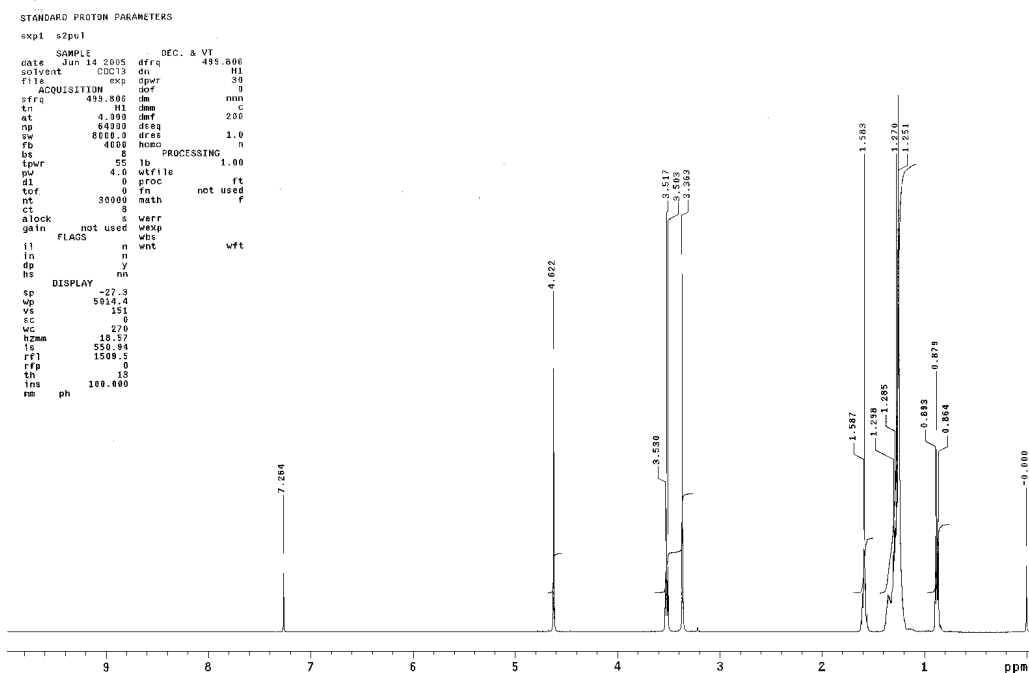

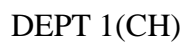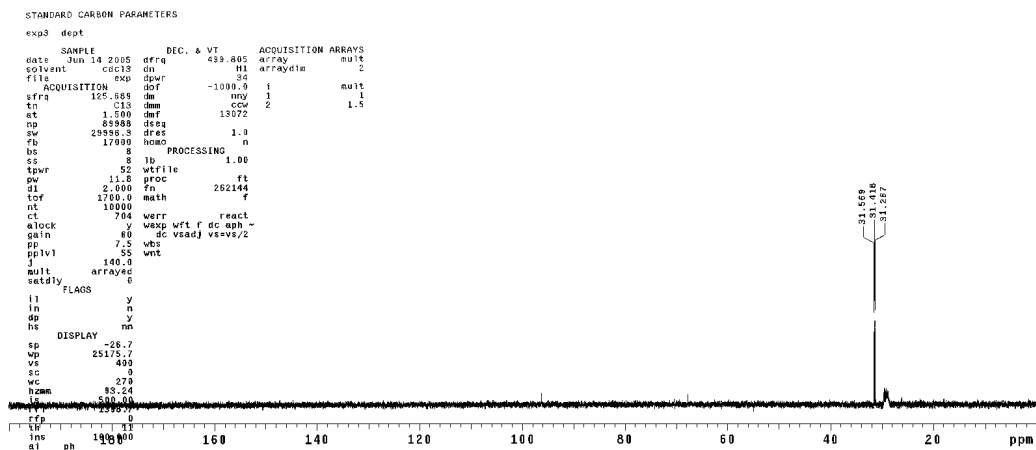



DEPT 2 (CH, CH<sub>3</sub>/CH<sub>2</sub>)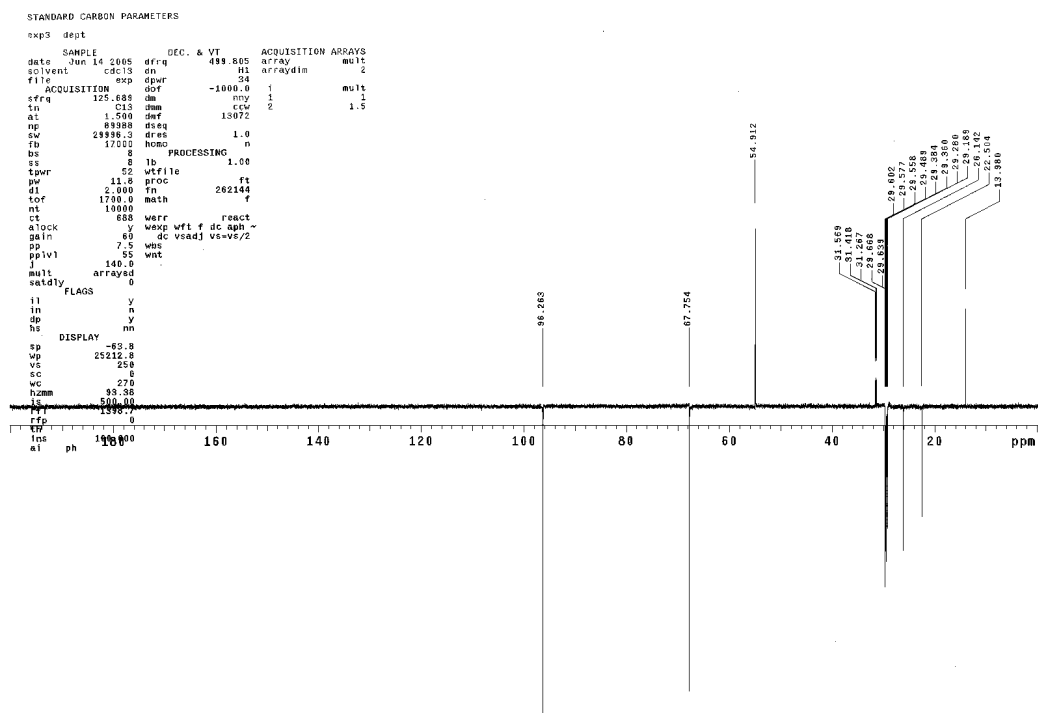

**12a** CH<sub>3</sub>CH<sub>2</sub>CH<sub>2</sub>CHDCH<sub>2</sub>CH<sub>2</sub>(CH<sub>2</sub>)<sub>2</sub>(CD<sub>2</sub>)<sub>2</sub>(CH<sub>2</sub>)<sub>6</sub>OH  
<sup>1</sup>H NMR

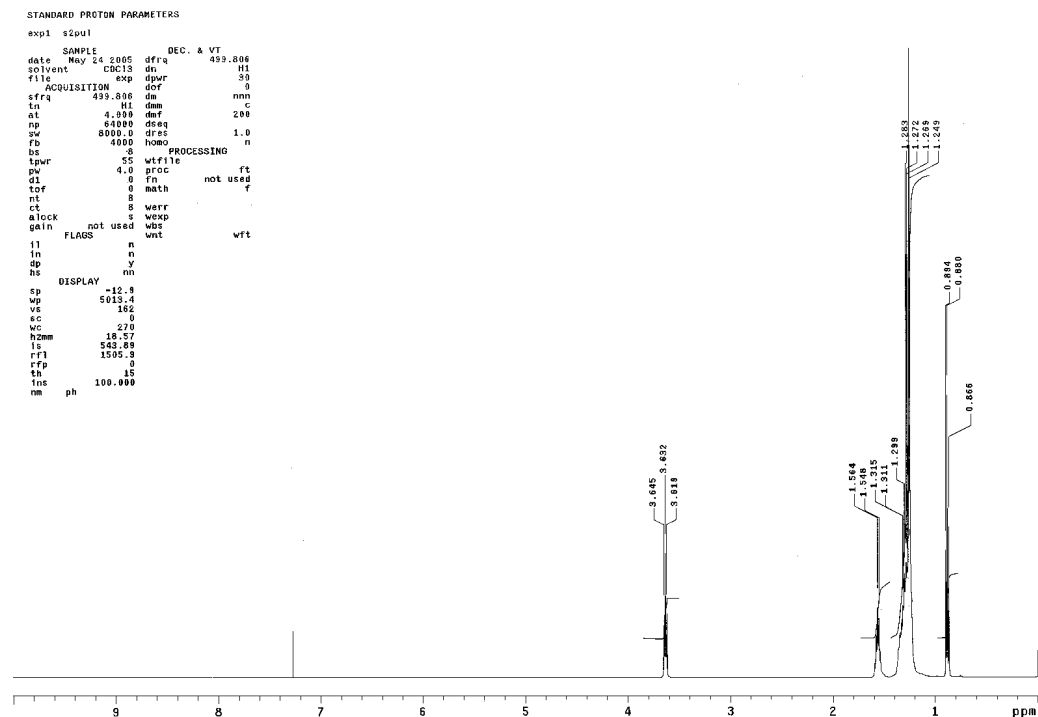

$^{13}\text{C}$  NMR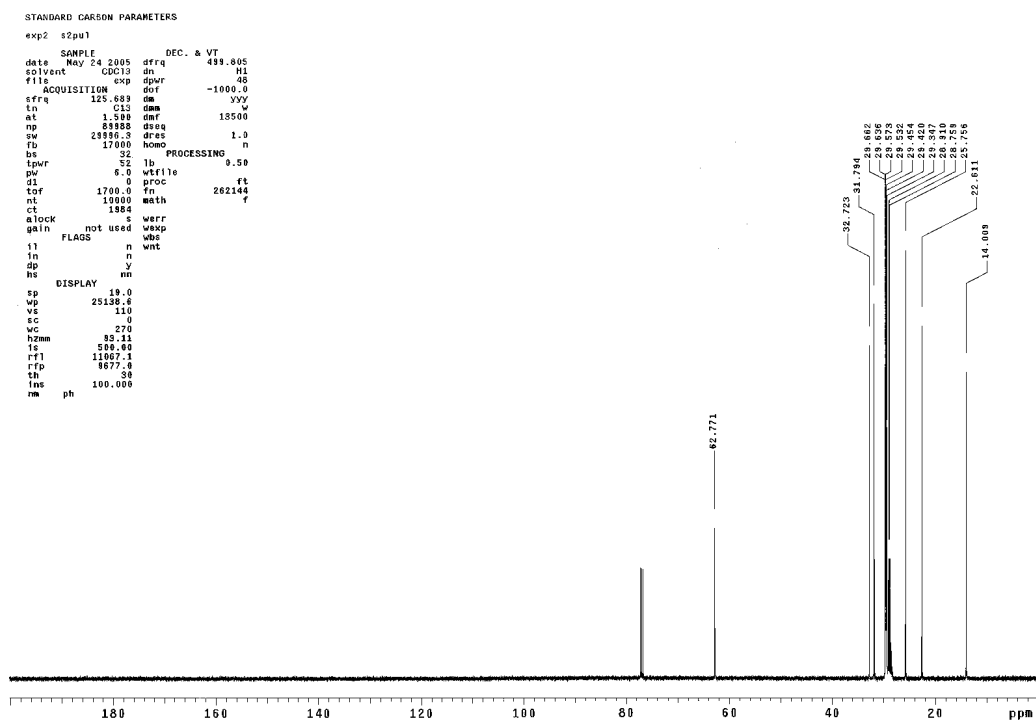

## DEPT 1(CH)

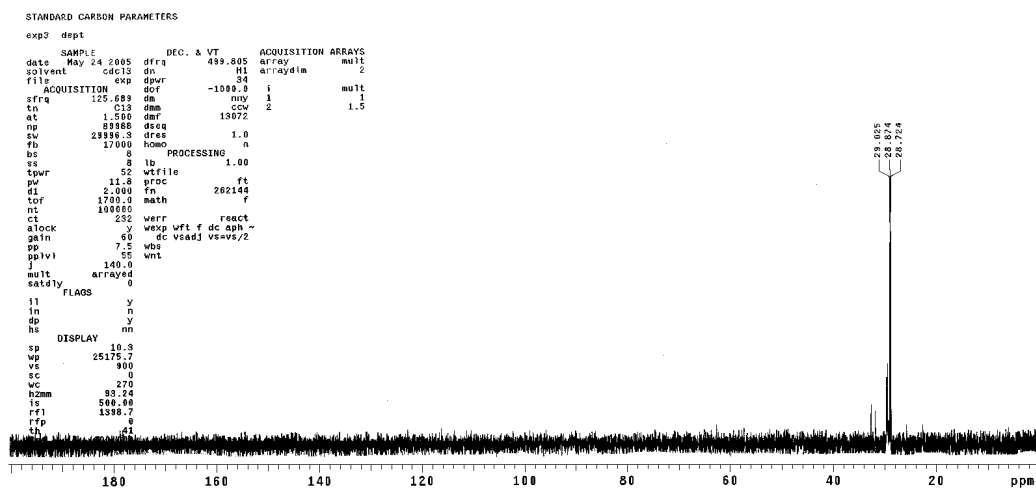

DEPT 2 (CH, CH<sub>3</sub>/CH<sub>2</sub>)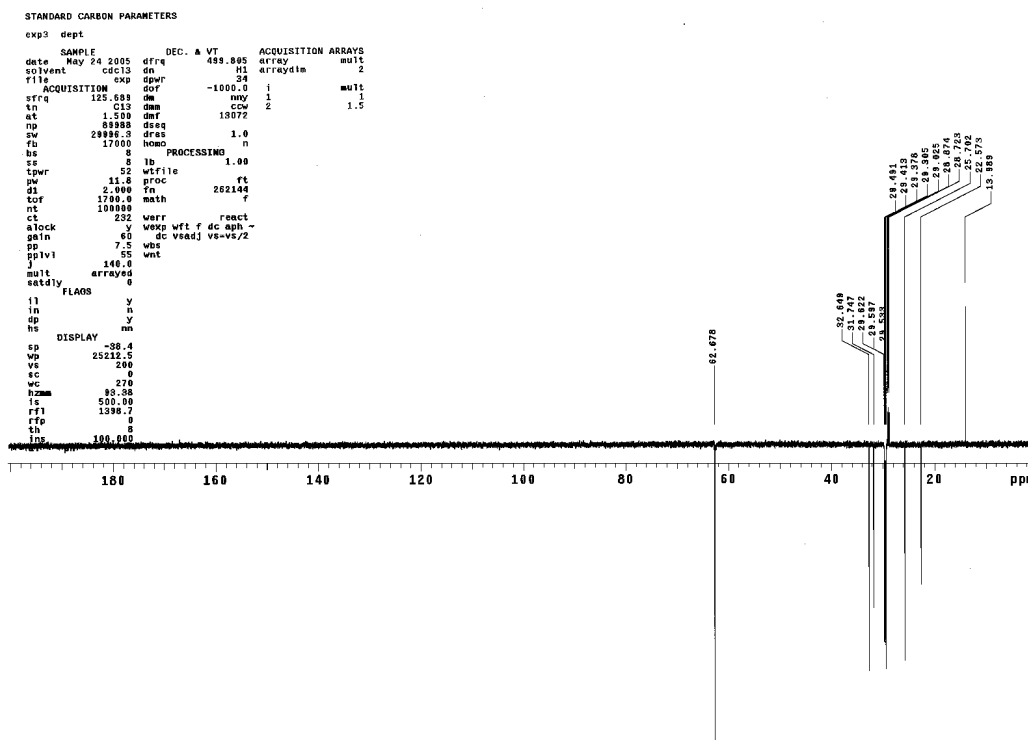

**12b** CH<sub>3</sub>CH<sub>2</sub>CHDCH<sub>2</sub>CH<sub>2</sub>CH<sub>2</sub>(CH<sub>2</sub>)<sub>2</sub>(CD<sub>2</sub>)<sub>2</sub>(CH<sub>2</sub>)<sub>6</sub>OH

<sup>1</sup>H NMR

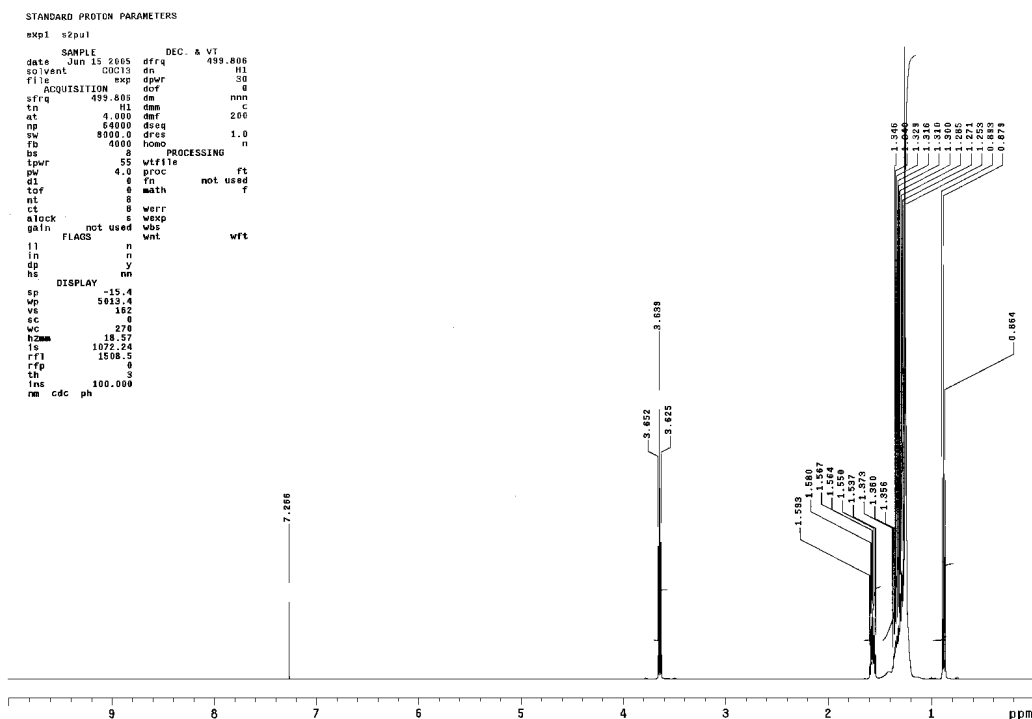

$^{13}\text{C}$  NMR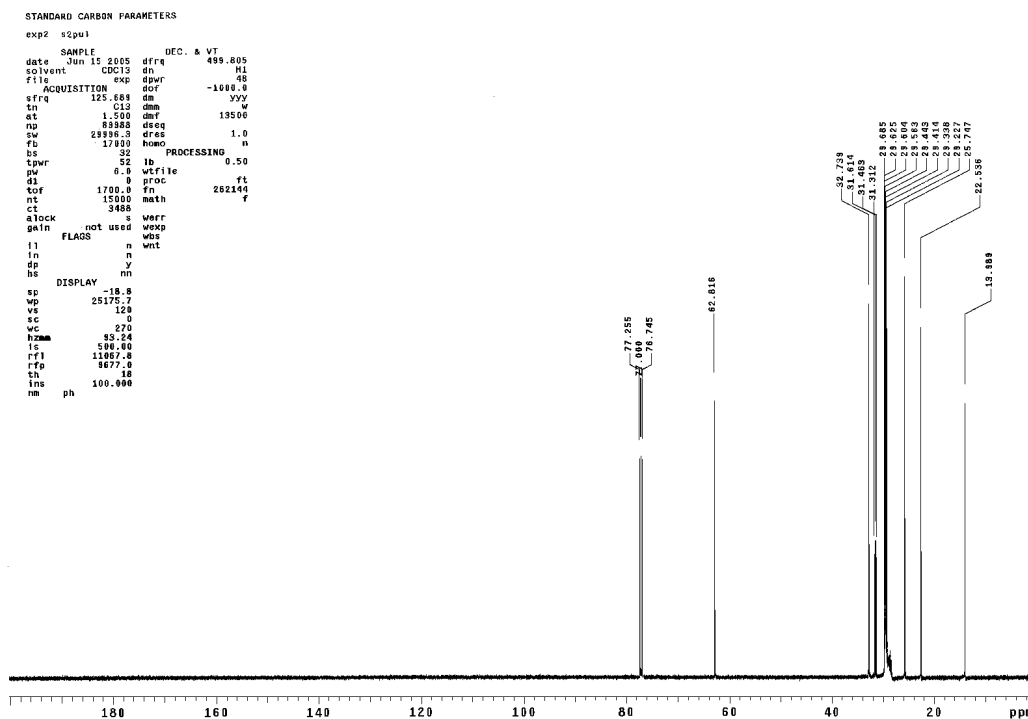

## DEPT 1(CH)

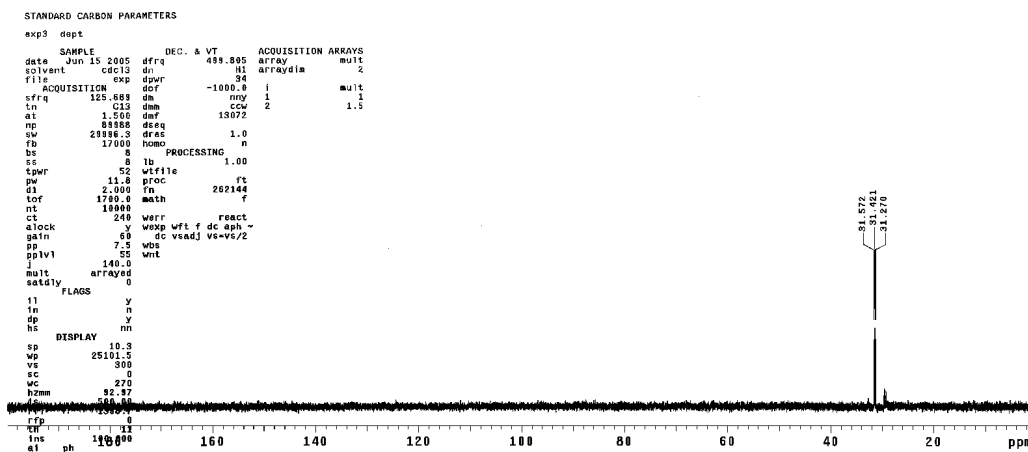

DEPT 2 (CH, CH<sub>3</sub>/CH<sub>2</sub>)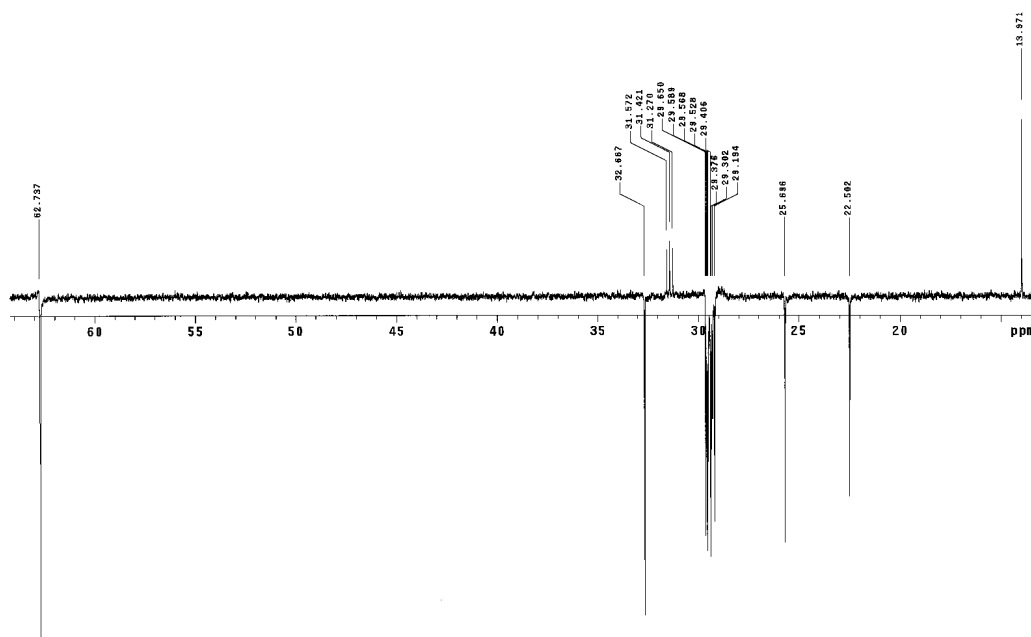

**(R)-13a** CH<sub>3</sub>(CH<sub>2</sub>)<sub>2</sub>CHO[MPA-(R)]C≡C  
<sup>1</sup>H NMR

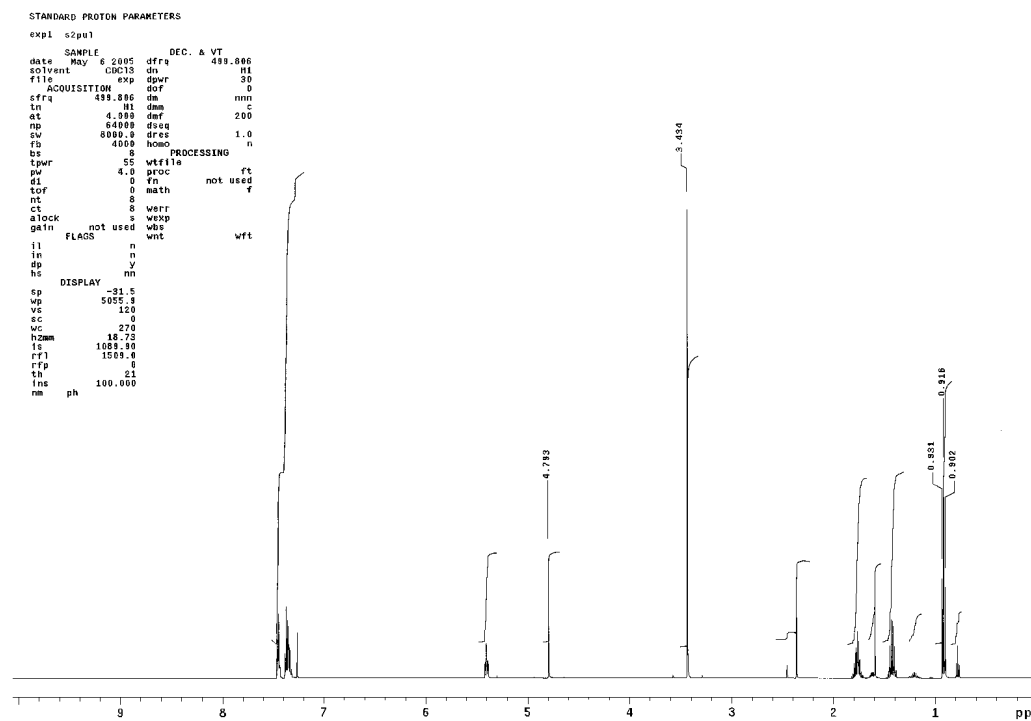

<sup>13</sup>C NMR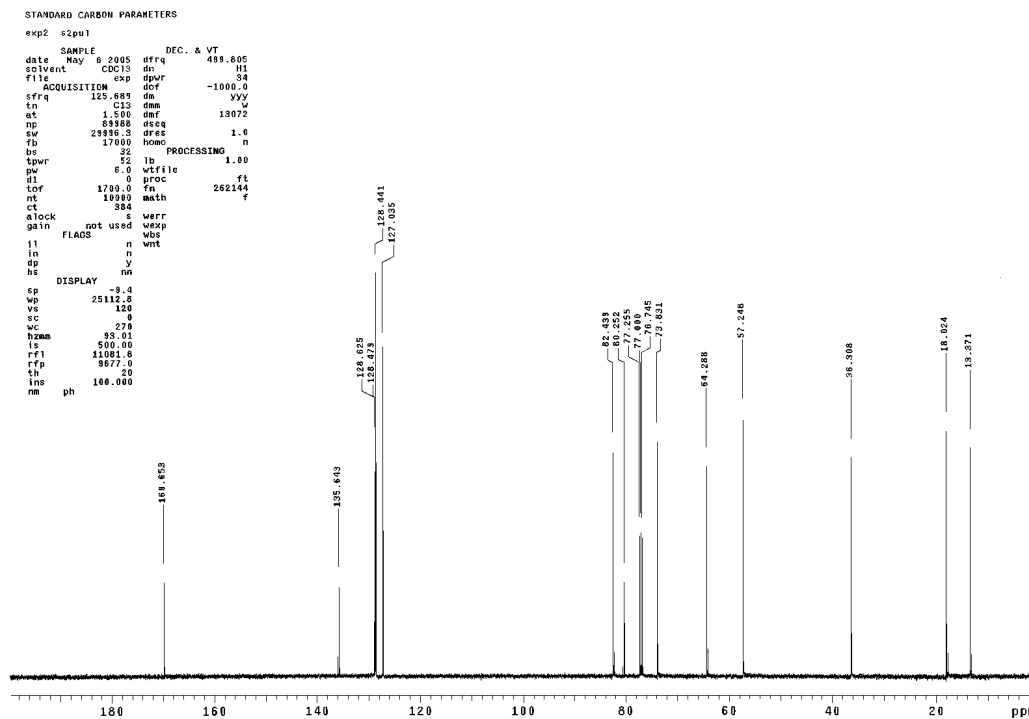

## DEPT 1(CH)

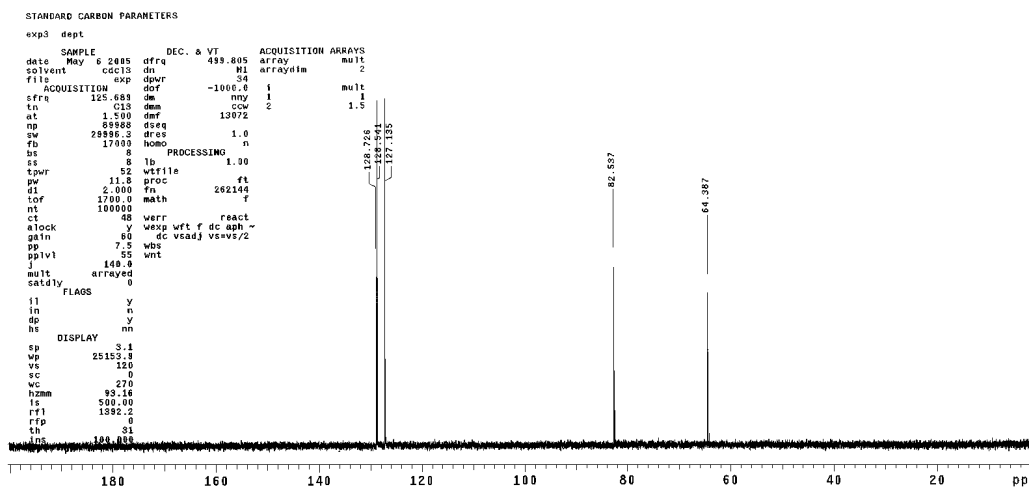

DEPT 2 (CH, CH<sub>3</sub>/CH<sub>2</sub>)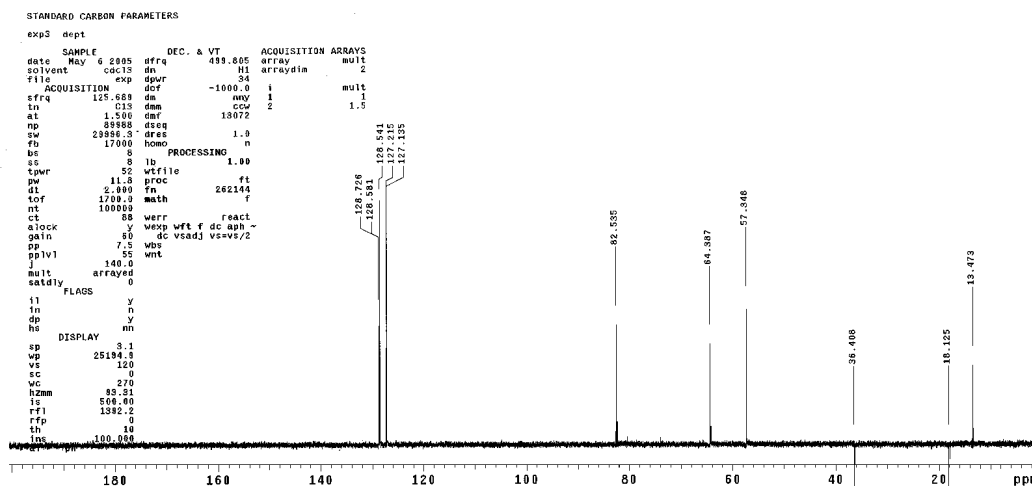

## DQCOSY

```

STANDARD PROTON PARAMETERS
Pulse Sequence: gDQCOSY
Solvent: CDCl3
Ambient temperature
INOVA-500      "rm500"

Relax. delay 1.167 sec
Acq. time 0.333 sec
Width 3861.4 Hz
2D Width 3861.4 Hz
4 repetitions
2 x 988 increments
OBSERVE H1 499.8033406 MHZ
DATA PROCESSING
Sg. sine bell 0.250 sec
  Shifted by -0.107 sec
F1 DATA PROCESSING
Sg. sine bell 0.150 sec
  Shifted by -0.090 sec
FT size 4096 x 4096
Total time 1 hr, 21 min, 46 sec

```

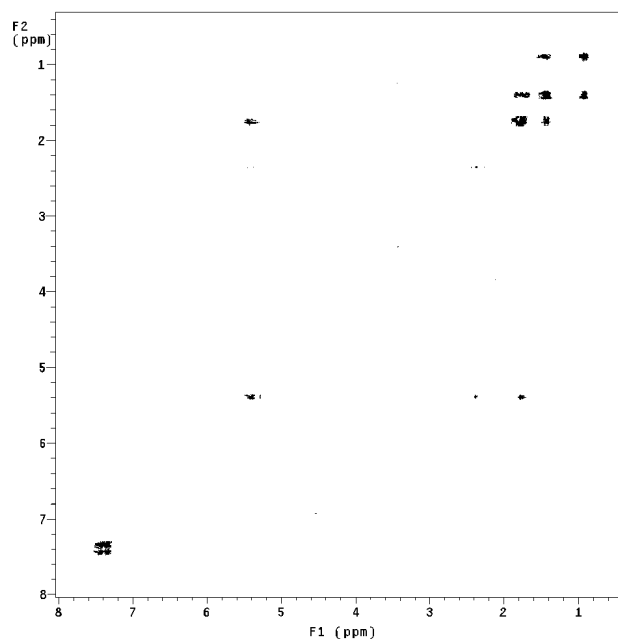

## HSQC

## STANDARD PROTON PARAMETERS

Pulse Sequence: gHMQC  
 Solvent: CDCl<sub>3</sub>  
 Ambient temperature  
 INOVA-500 "rnm500"  
 Relax. delay 1.200 sec  
 Acq. time 8.300 sec  
 Width 3766.8 Hz  
 2D Width 14917.0 Hz  
 8 repetitions  
 2 x 256 increments  
 OBSERVE H1, 459.8039356  
 DECOUPLE C13, 125.6846895  
 Power 46 dB  
 on during acquisition  
 off during delay  
 GARP-1 modulated  
 DATA PROCESSING  
 Gauss apodization 0.082 sec  
 F1 DATA PROCESSING  
 Gauss apodization 0.031 sec  
 F1 size 2048 x 2048  
 Total time 1 hr, 48 min, 29 sec

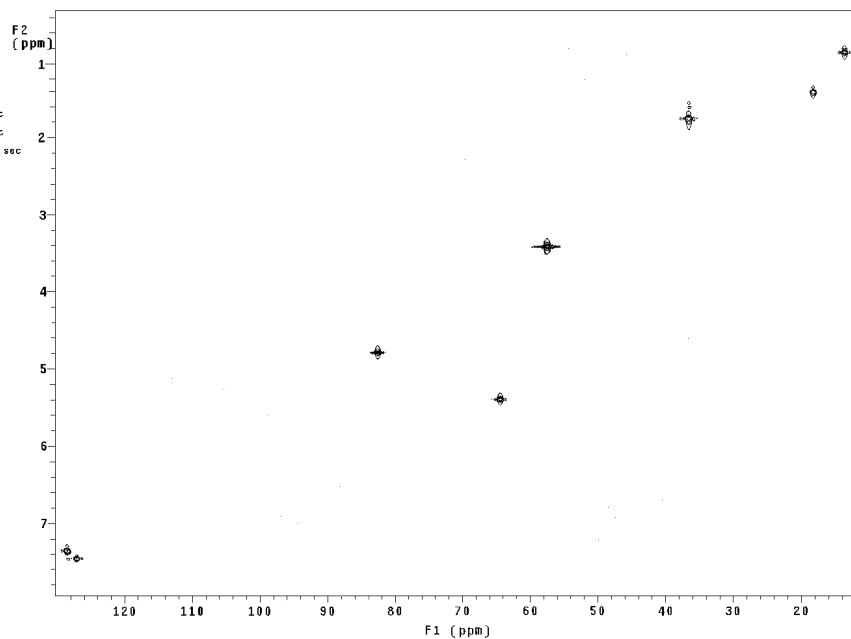

**(S)-13a** CH<sub>3</sub>(CH<sub>2</sub>)<sub>2</sub>CHO[MPA-(R)]C≡C  
<sup>1</sup>H NMR

## STANDARD PROTON PARAMETERS

exp1 s2pu1

SAMPLE 3.2005 dfrs DEC. & VT 459.806  
 date May 3.2005 dfrs H1  
 solvent CDCl<sub>3</sub> dn dpr 35  
 file exp dpr 0  
 ACQUISITION exp dpr 0  
 dfrs 459.806 dm nm  
 tn H1 dm C  
 at 4.900 dmf 200  
 sp 8000.0 dssq 1.0  
 sw 4000 homo n  
 bs 8 PROCESSING  
 tpwr 55 wtfite ft  
 pw 4.0 proc not used  
 d1 0 fn f  
 tof 0 meth  
 nt 8  
 ct 8 werr  
 alock s wexp  
 gain not used wbs  
 FLAGs not used wnt vft  
 il n  
 in n  
 dp y  
 hs nn  
 DISPLAY  
 sp -11.7  
 wp 5011.2  
 ve 182  
 sc 6  
 wc 270  
 h2mm 18.56  
 lg 1312.22  
 rfl 1506.8  
 rfp 0  
 th 9  
 ins 100.008  
 rm ph

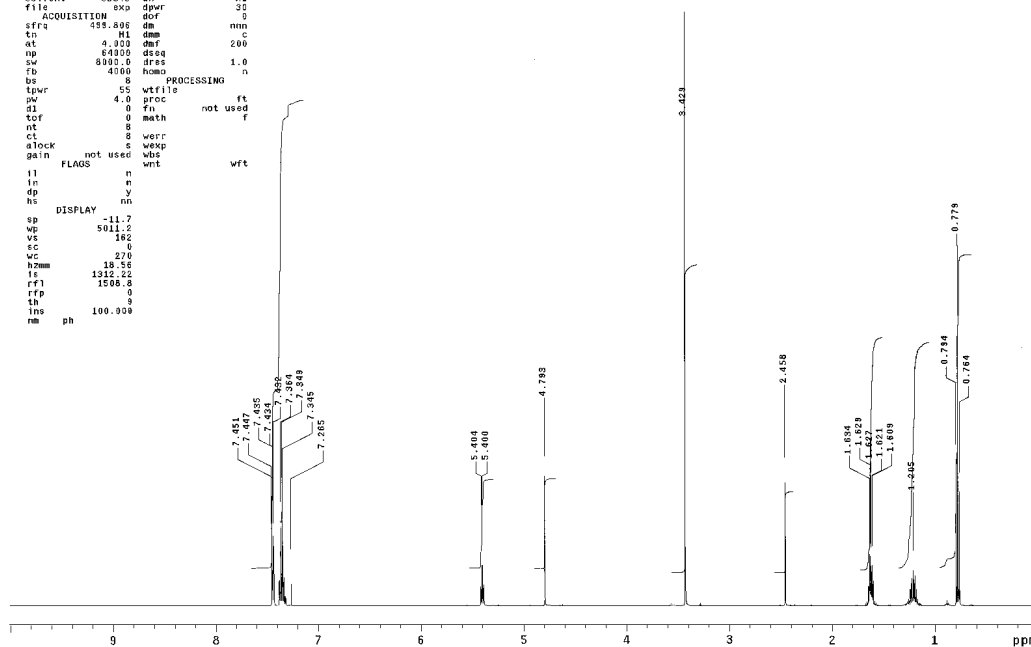



<sup>13</sup>C NMR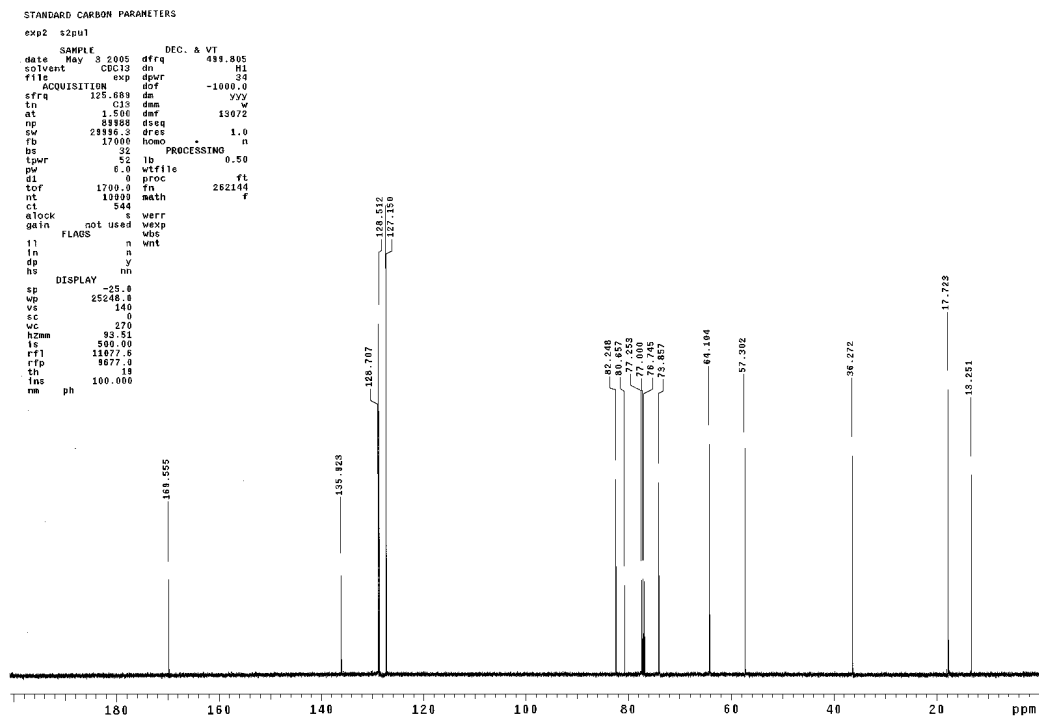

## DEPT 1(CH)

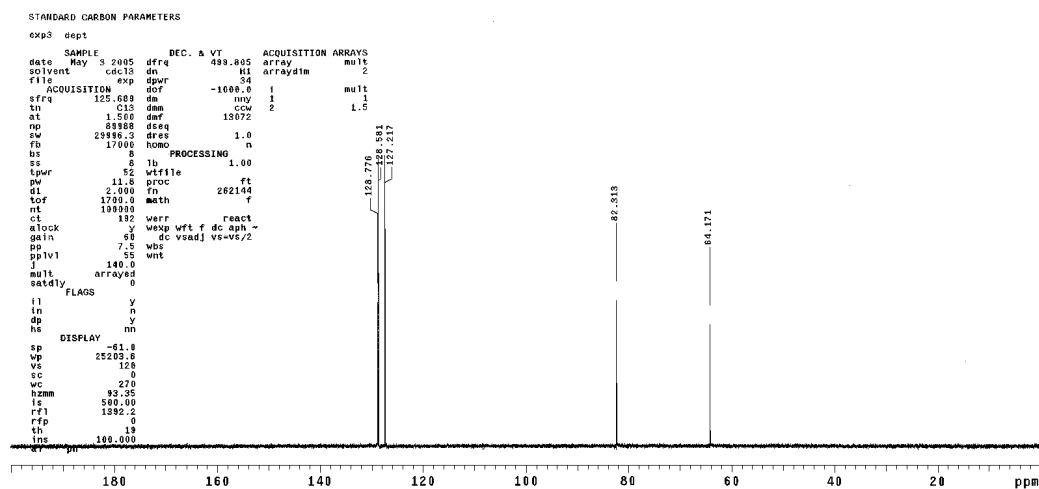

DEPT 2 (CH, CH<sub>3</sub>/CH<sub>2</sub>)

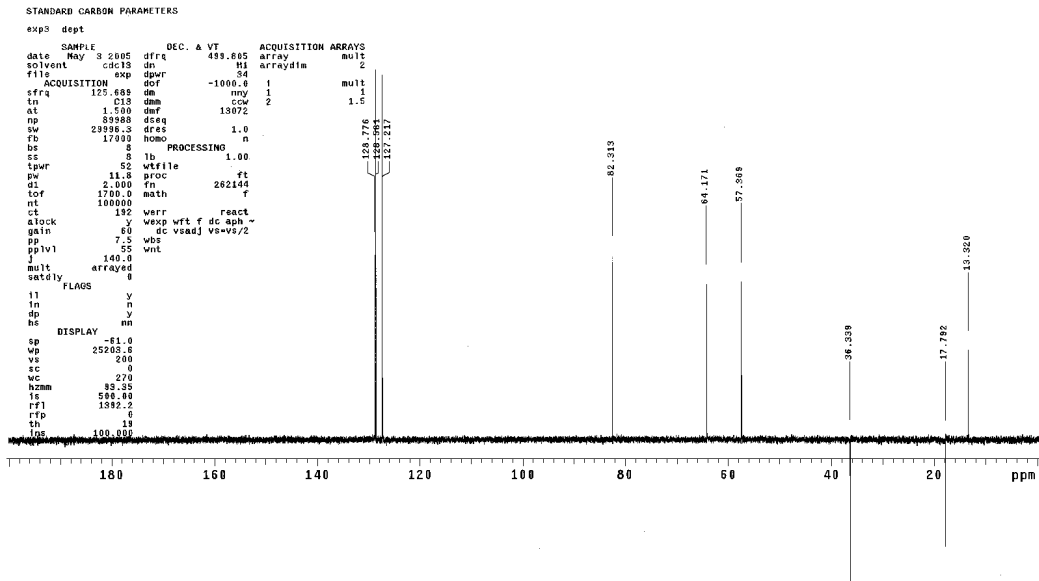

DQCOSY

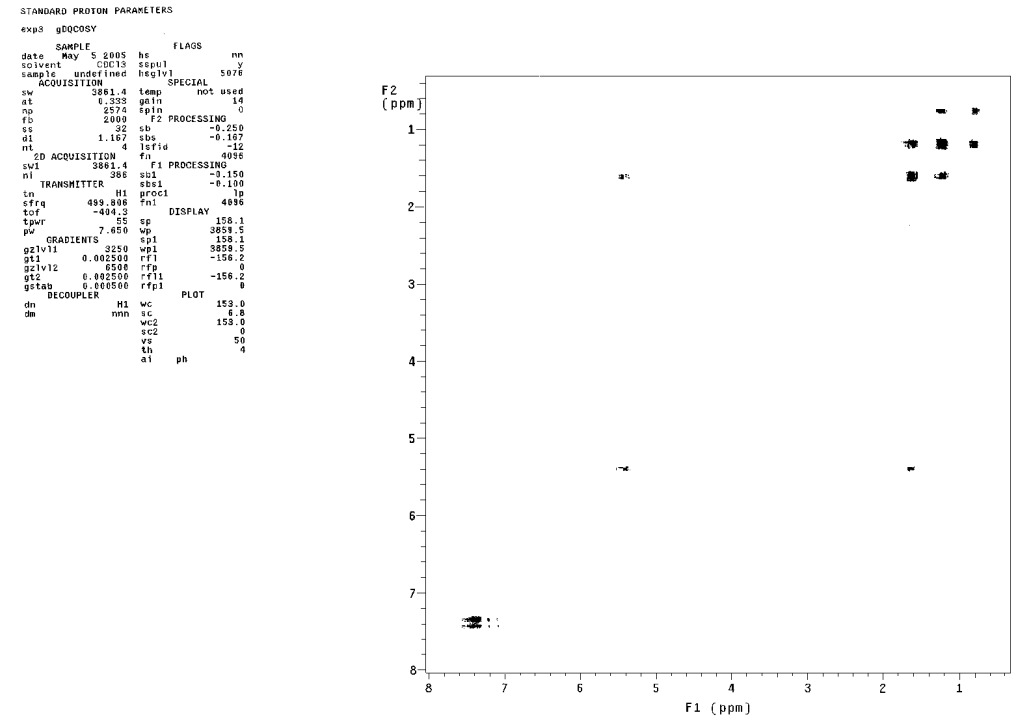

## HSQC

## STANDARD PROTON PARAMETERS

Pulse Sequence: gHSQC

Solvent: CDCl<sub>3</sub>

Ambient Temperature

INOVA-500 "run500"

Relax. delay 1.200 sec  
 Acq. time 0.300 sec  
 Width 9766.0 Hz  
 2D Width 14317.0 Hz  
 2 x 256 increments  
 OBSERVE H1, 499.8039356 MHz  
 DECOUPLE d13, 125.6846855 MHz  
 Power 48 dB  
 on during acquisition  
 off during delay  
 GASP-1 modulated  
 DATA PROCESSING  
 Gauss apodization 0.062 sec  
 F1 DATA PROCESSING  
 Gauss apodization 0.011 sec  
 FT size 1024 X 2048  
 Total time 1 hr, 48 min, 29 sec

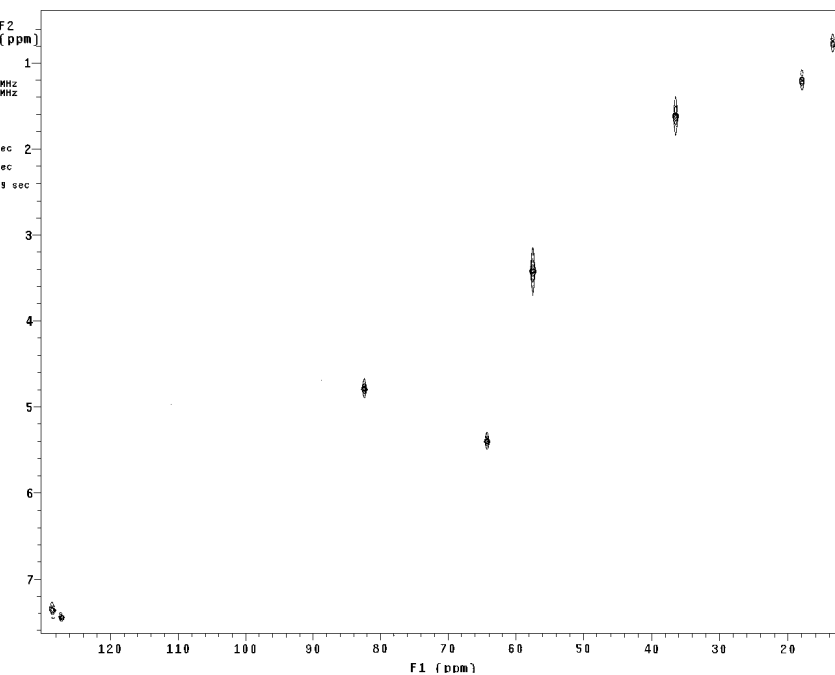

**(R)-13b** CH<sub>3</sub>CH<sub>2</sub>CHO[MPA-(R)]CH<sub>2</sub>C≡C  
<sup>1</sup>H NMR

## STANDARD PROTON PARAMETERS

expl s2pul

SAMPLE REC. &amp; VI

date May 25 2005 dfrq 499.806

solvent CDCl<sub>3</sub> dn H1

file /export/home/ dpvr 30

pv215/vmr/svs/data= dof 0

/JLASS/CDMPAR--CH- dm nnn

2DC-1HCLB1.fid dnm c

ACQUISITION dnr 200

sfrq 499.806 dseq

tn H1 dres 1.0

at 4.000 hmc n

np 64000 PROCESSING

pw 8000.0 vtrfile

fb 4000 proc ft

bs 8 fn not used

spwr 55 math f

pw 4.0

d1 0 werr

tof 0 wexp

nt 8 wbs

ct 8 wnt wft

alock s

gain not used

il FLAGS n

in n

ep y

hs nm

DISPLAY

sp -22.5

vp 5045.7

vs 182

sc 8

wc 278

hzmm 18.61

ts 965.33

rtf 1500.0

rfp 0

tn 15

lms 100.000

nm ph

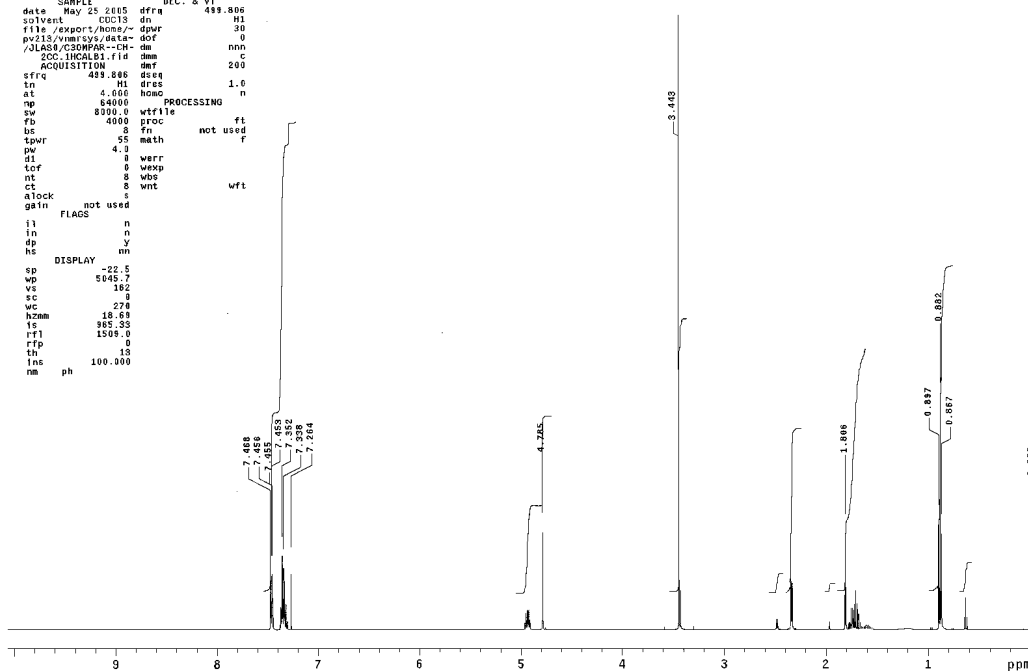

<sup>13</sup>C NMR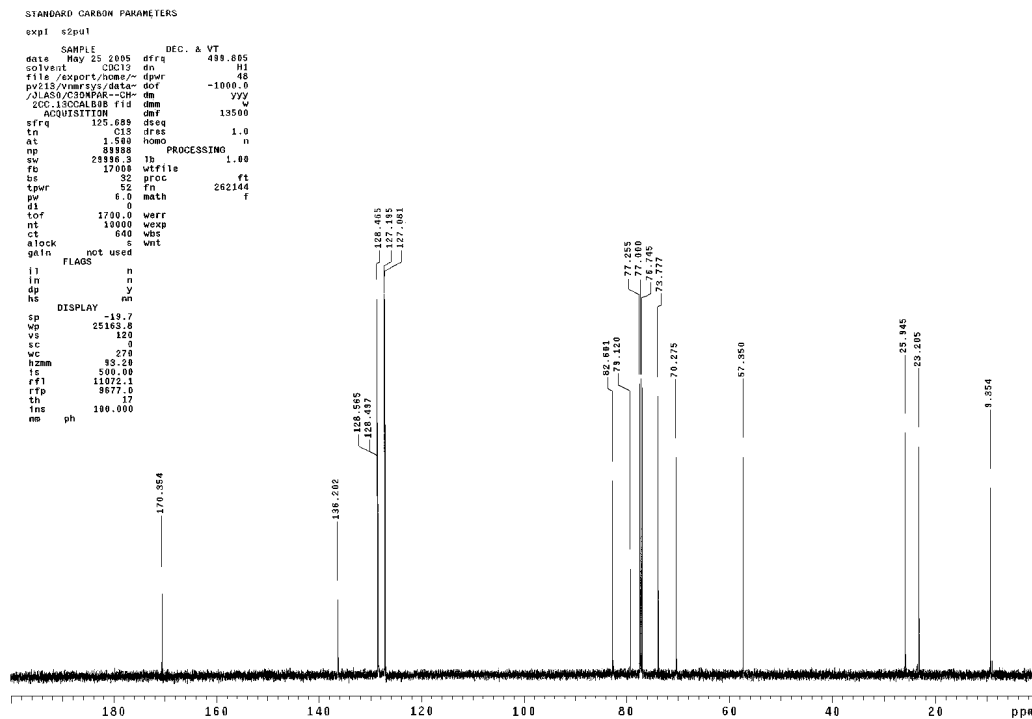

## DEPT 1(CH)

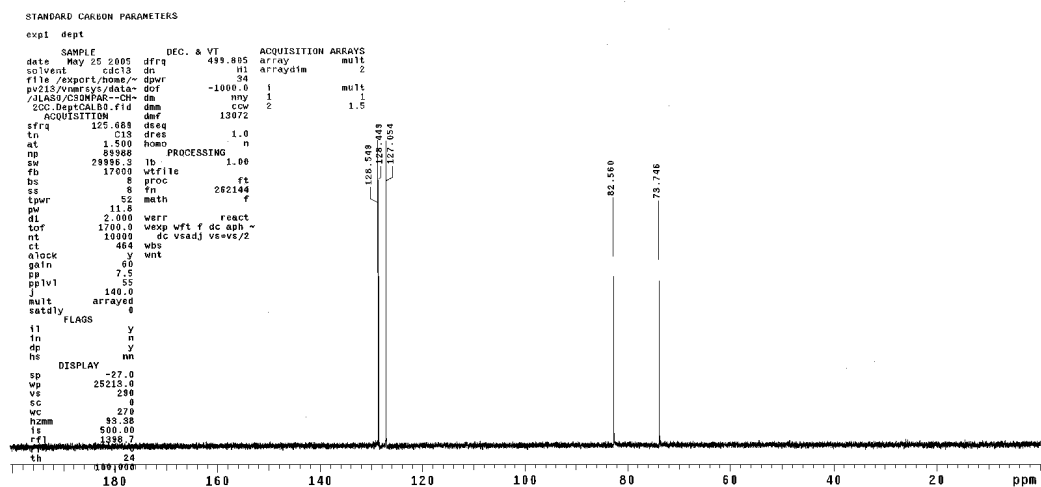

DEPT 2 (CH, CH<sub>3</sub>/CH<sub>2</sub>)

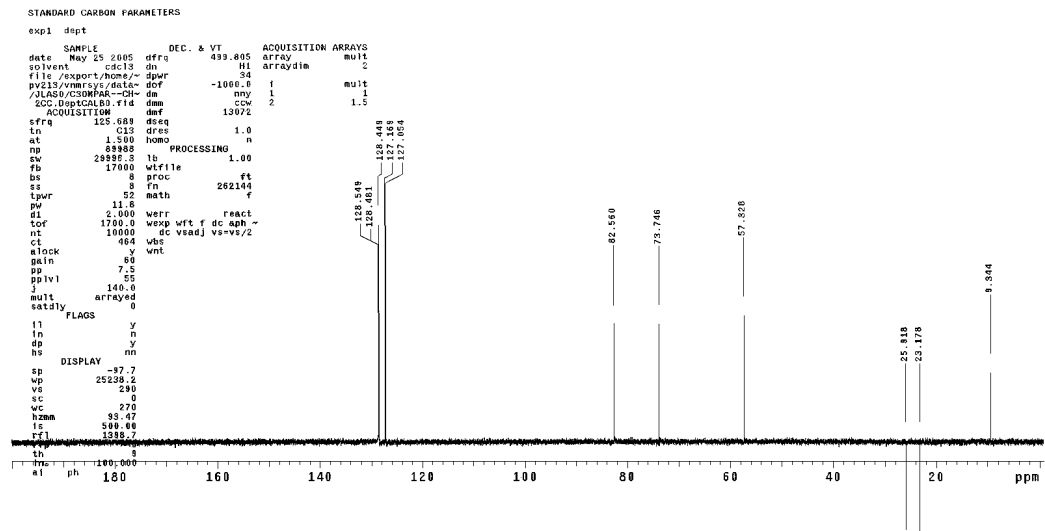

DQCOSY

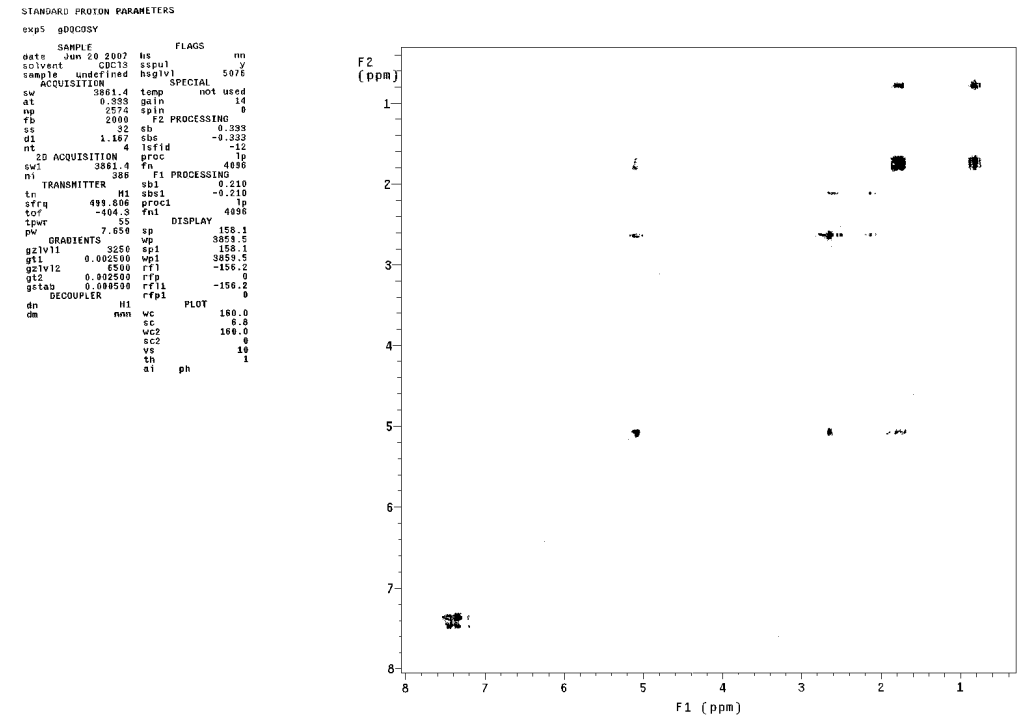

## HSQC

## STANDARD PROTON PARAMETERS

exp1 ghsqc

```

SAMPLE          FLAGS          ACQUISITION ARRAYS
date May 28 2005  h1          n array phase
solvent CDC13    s2pul       y arraydim
sample undefined PFGflg      5078 1 phase
ACQUISITION     SPECIAL      2
sw 4100.0        g2lv11      0.002000
at 0.380         temp F2     not used
mp 2480          g2lv11      38
rb 2000          spin (ppm)  0
ss 32            GRADIENTS
di 1.200         g2lv11      5676
nt 8             g11         0.002000
2D ACQUISITION  g2lv13      1 2547
sw1 15549.1      g13         0.001000
nt 512           g12         0.000500
phase arrayed    F2 PROCESSING
TRANSMITTER     sb          0.270
tn H1           sb          -0.270
sfrq 499.806     proc       1p
torf -81.4       fu         2648
tpwr 55          F1 PROCESSING
pw 7.058         sb1         0.032
DECOUPLER       C13         -0.032
dn C13           proc1      1p
dof -3020.0      fn1         8192
dm hny          sp          35.7
dmc 18518        wp          4886.9
dpr 66           sp1         1523.3
pwxlv1 12.900    s3 wp1     15545.3
pwx HSQC        rf1         -91.7
j1xh 140.0       rfp         0
nullflg y        rfp1        18882.8
mult 2           rfp1        2101.9
wc 210.8         PLOT 4
sc 8.8
ec 150.9
vs 239259
th 1
ai ph

```

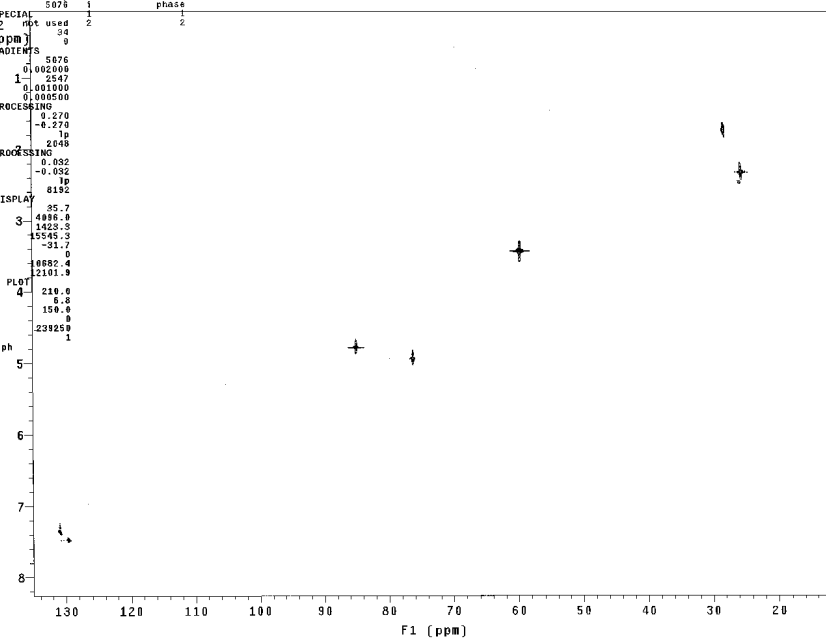

(S)-13b  $\text{CH}_3\text{CH}_2\text{CHO}[\text{MPA-(R)}]\text{CH}_2\text{C}\equiv\text{C}$   
 $^1\text{H}$  NMR

## STANDARD PROTON PARAMETERS

exp1 s2pul

```

SAMPLE          DEC. & VT
date May 12 2005  sfrq 499.896
solvent CDC13    dn         H1
f110 /export/home/ dpr      38
p213/vnmrsys/data- dof      0
/3LASO/CONPAK--CH- dm      rms
CCC-CALIB.fid     dm        c
ACQUISITION      def        200
sfrq 499.896      dreq
tn 4.000          H1 drac     1.8
np 84000          wfile      0
pw 8000.0         wfile      0
rb 4000           proc       ft
bs 8             f1p        not used
tpwr 55          math
pw 4.0           werrf
di 0             wexp
torf 0           wbs
nt 8             wnt
ct 8             wnt
alock not used
gain not used
FLAGS
i1 n
tn n
dp y
hs mn
DISPLAY
sp -20.5
wp 5025.9
ve 150
sc 0
wc 270
h2nm 10.61
lg 1408.51
rf1 1507.3
rfp 0
lps 15
nm ph 100.000

```

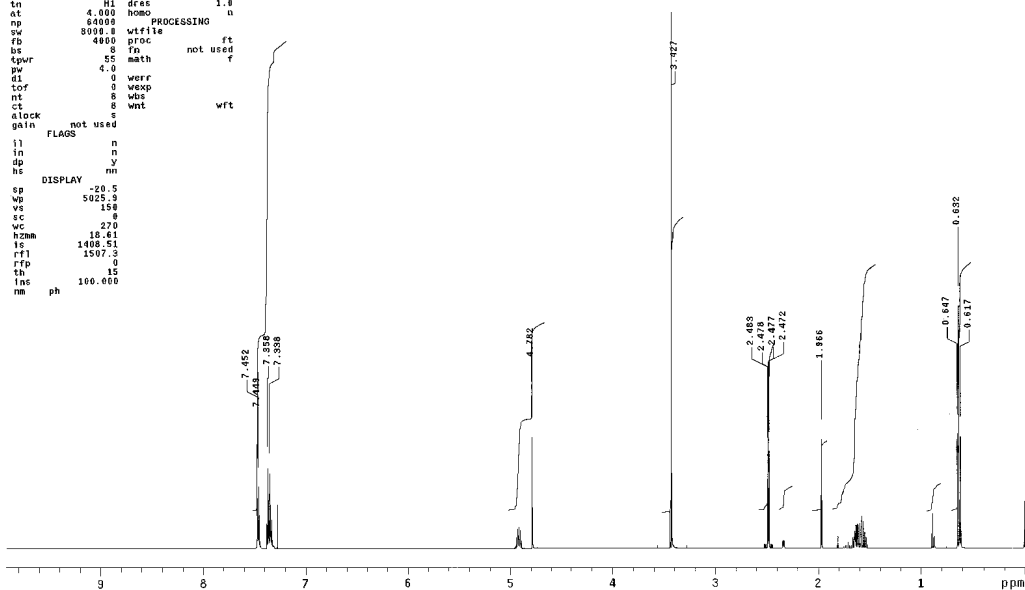

<sup>13</sup>C NMR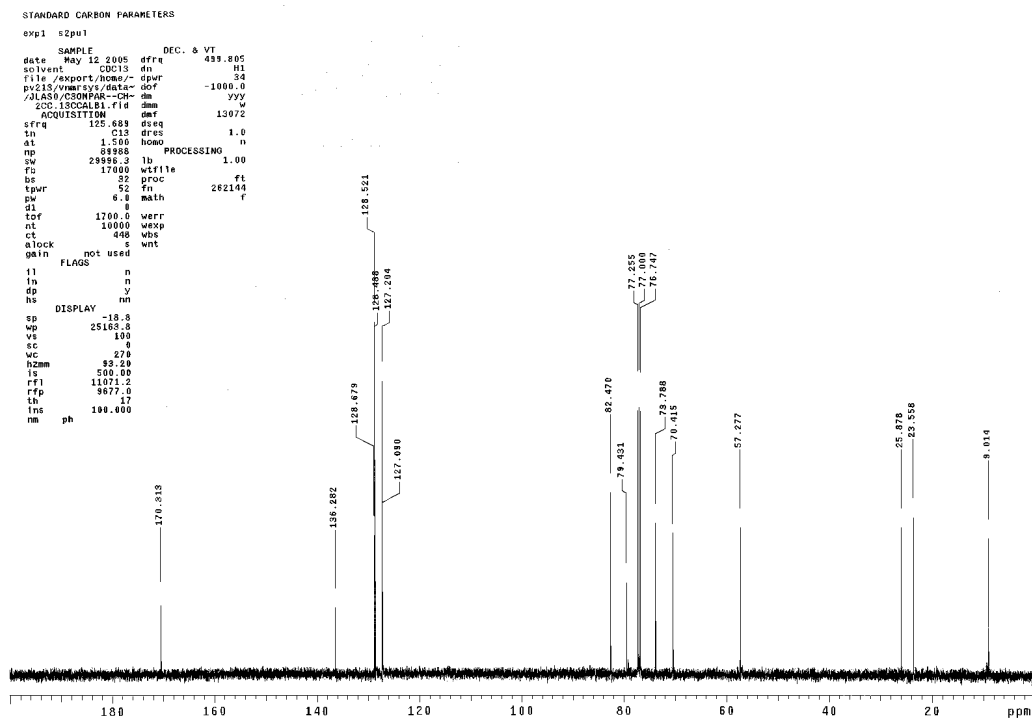

## DEPT 1(CH)

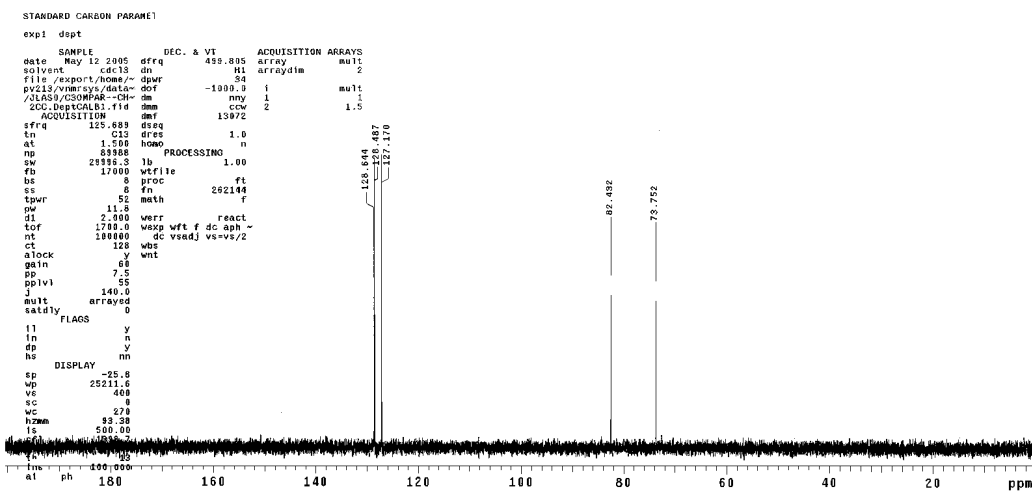

DEPT 2 (CH, CH<sub>3</sub>/CH<sub>2</sub>)

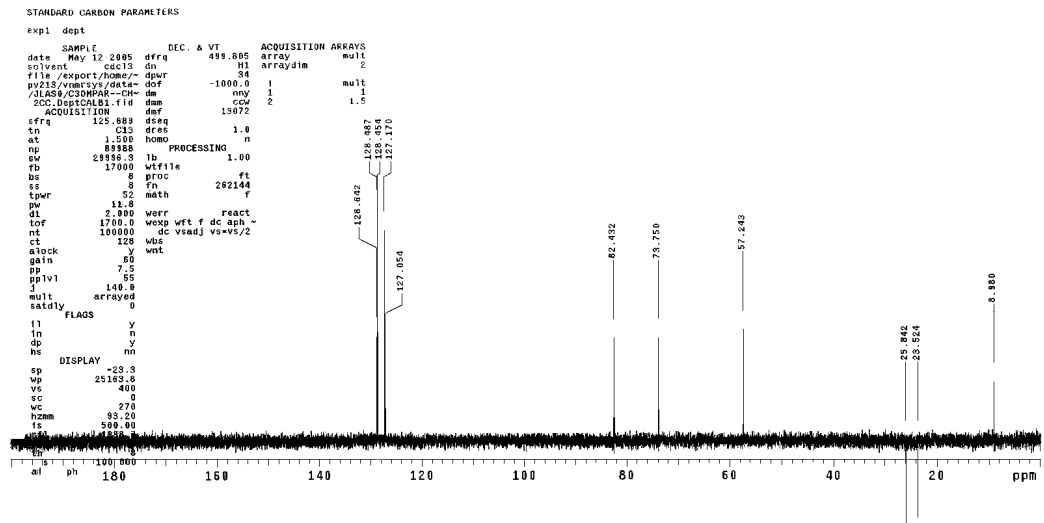

DQCOSY

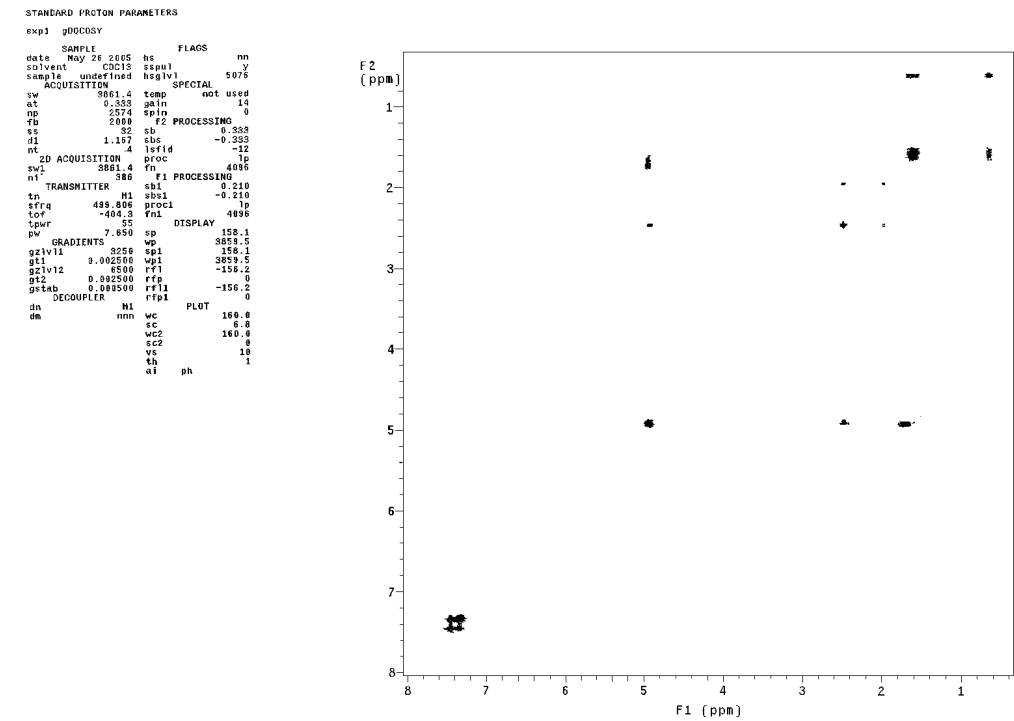



**(R)-14a**  $\text{CH}_3(\text{CH}_2)_2\text{CHO}[\text{MPA-(R)}]\text{CH}_2\text{CH}_2(\text{CH}_2)_2(\text{CD}_2)_2(\text{CH}_2)_6\text{OMOM}$   
 $^1\text{H}$  NMR

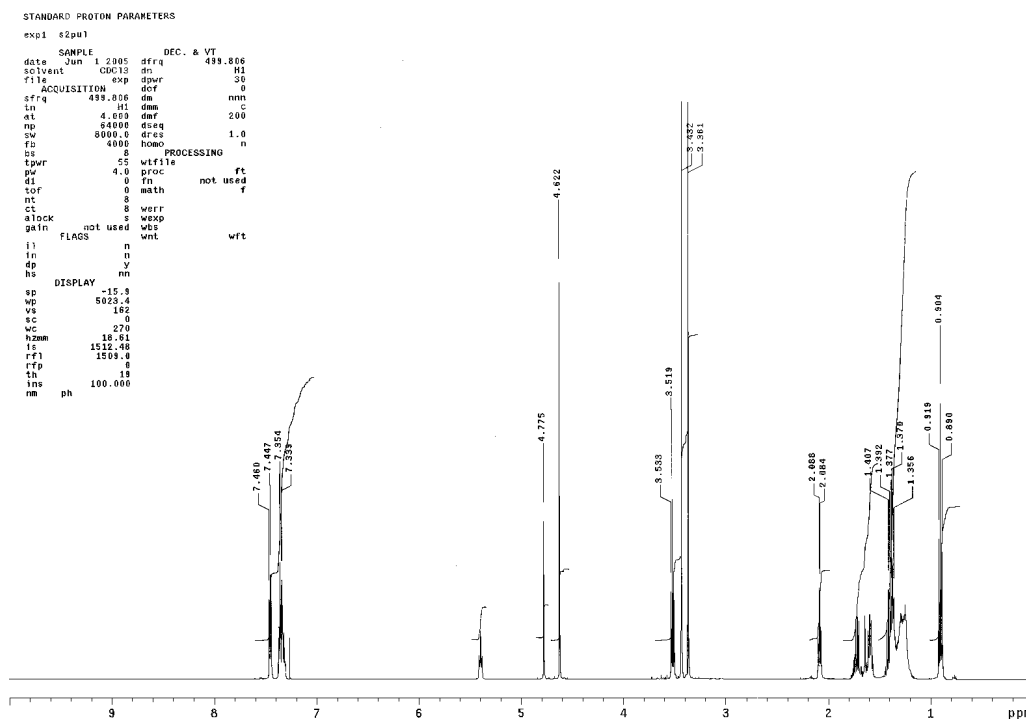

$^{13}\text{C}$  NMR

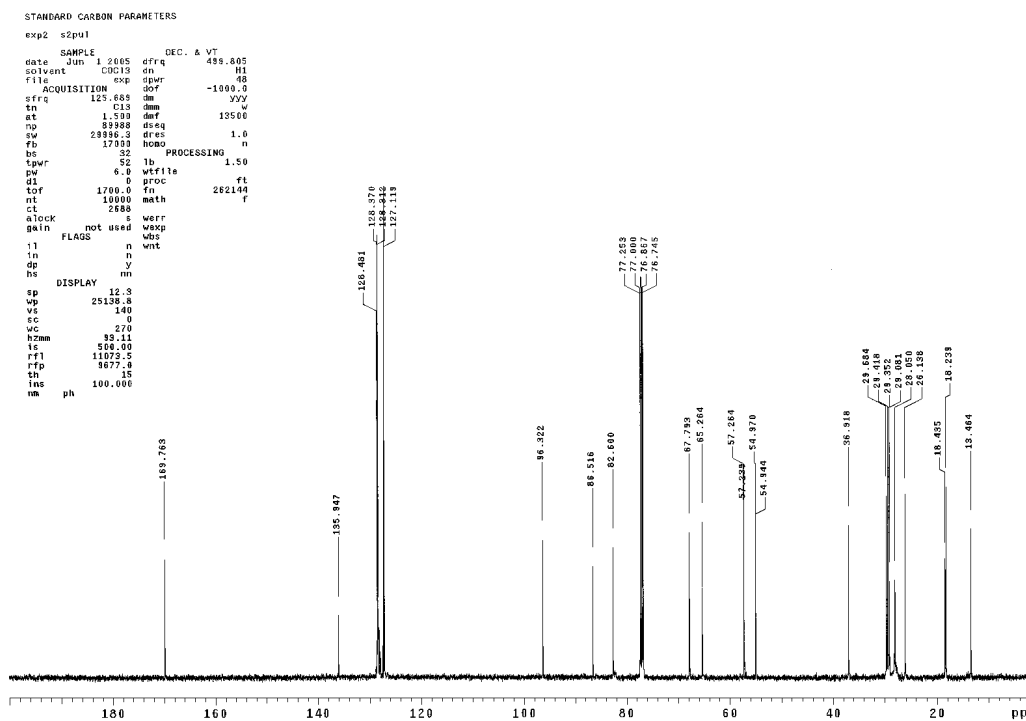

## DEPT 1(CH)

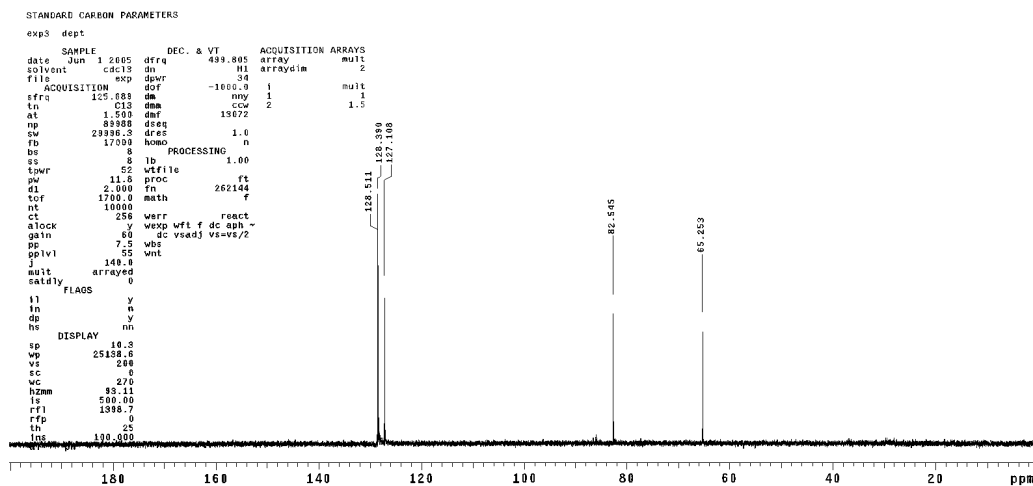DEPT 2 (CH, CH<sub>3</sub>/CH<sub>2</sub>)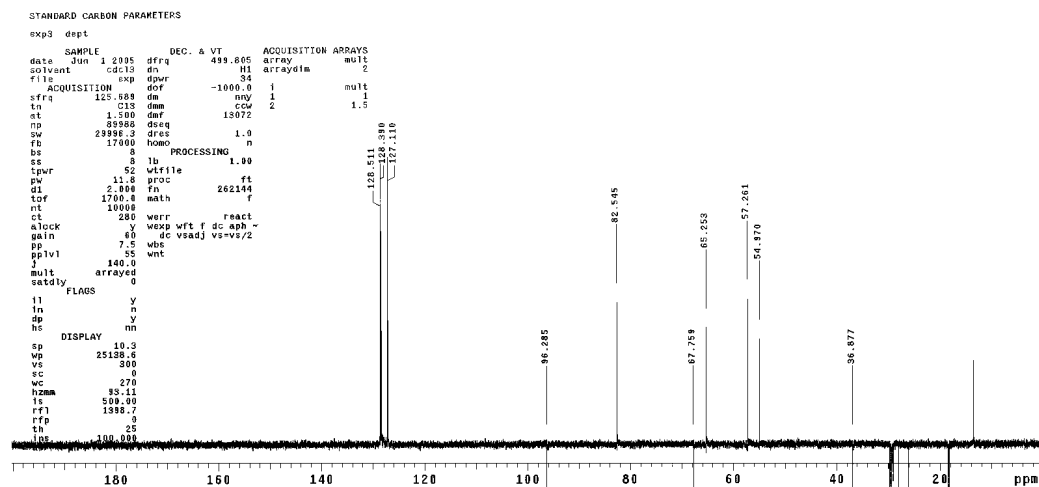

DQCOSY

STANDARD PROTON PARAMETERS  
exp8 gDQCOSY

SAMPLE FLAGS  
date Jun 1 2005 hs nn  
solvent CDCl3 sspul y  
sample undefined hsglvi 5075  
ACQUISITION SPECIAL not used  
sv 3661.4 temp 14  
at 0.335 gain 9  
np 2574 spin 0  
fb 2000 F2 PROCESSING  
ss 32 sb 0.333  
cl 1.167 sbs -0.333  
nt 4 lsfid -12  
2D ACQUISITION proc lp  
sw1 3661.4 fn 4896  
ni 366 F1 PROCESSING  
TRANSMITTER sb1 0.210  
tn H1 sbu1 -4.210  
sfrq 499.806 proc1 lp  
tof -404.3 fn1 4896  
lpwr 55 DISPLAY  
pw 7.650 sp 158.1  
GRADIENTS wp 3051.5  
gzlv11 3250 sp1 158.1  
gt1 0.002500 wp1 3051.5  
gzlv12 6500 rf1 -156.2  
gt2 0.002500 rfp 0  
gslab 0.000500 rf11 -156.2  
DECOUPLER rf11 0  
dn H1 PLOT  
dm nnn wc 160.0  
sc 6.0  
wc2 160.0  
sc2 0  
vs 10  
th 1  
at ph

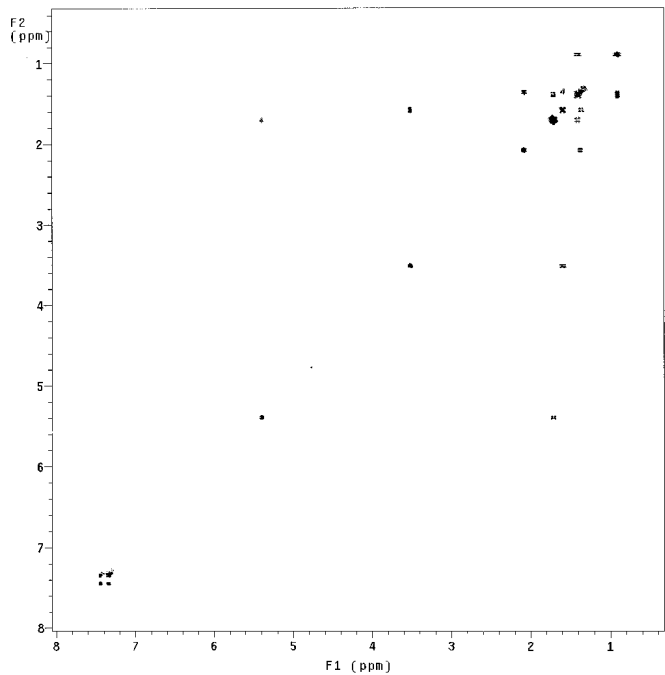

HSQC

STANDARD PROTON PARAMETERS

exp1 gHSQC

SAMPLE FLAGS ACQUISITION ARRAYS  
date Jun 2 2005 hs n array phase  
solvent CDCl3 sspul y arraydim 1024  
sample undefined pfcf13 y phase  
ACQUISITION hsglvi 5076 1 1  
sv 4100.0 temp F2 not used 2 2  
at 0.300 gain 34  
np 2460 spin(ppm) 0  
fb 2000 F2 PROCESSING  
ss 32 GRADIENTS 5076  
cl 1.200 gzlv11 0.002000  
nt 8 gzlv12 1 2507  
sw1 15548.1 pt3 0.001000  
ni 512 gslab 0.000500  
phase arrayed F2 PROCESSING  
TRANSMITTER sb 0.270  
tn H1 sbu -0.270  
sfrq 499.806 proc lp  
tof -414.4 fn 2000  
lpwr 55 F1 PROCESSING  
pw 7.650 sb1 0.832  
DECOUPLER sbu1 -0.832  
dn C13 proc1 lp  
dm nny DISPLAY 35.7  
dmf C08 sp 3 4896.0  
dpwr 48 sp1 1425.3  
poclv1 88 wp1 15548.3  
pwr HSCC 12.900 rf1 -31.7  
j1xh 140.0 rfp 0  
nullf1g 140.0 rf11 -08682.4  
mult 2 rf11 12101.9

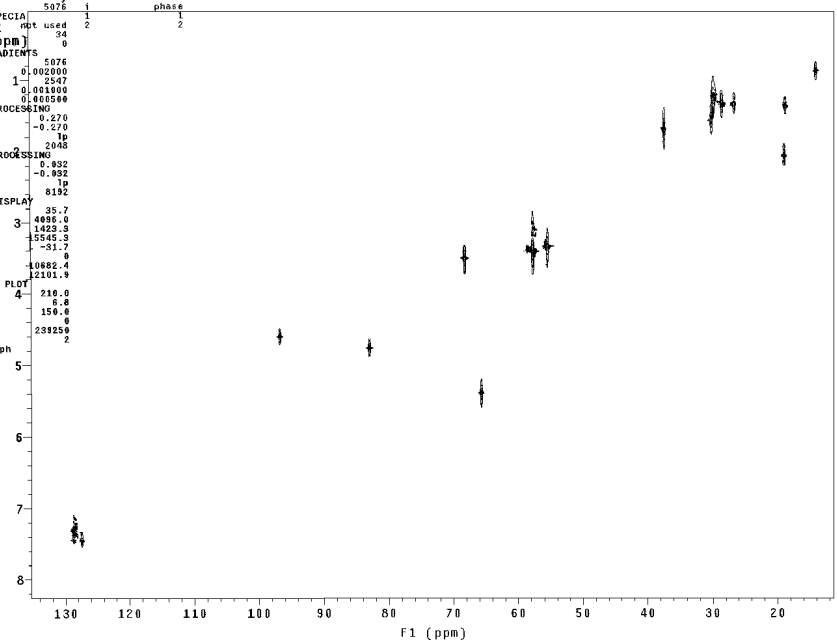

**(S)-14a**  $\text{CH}_3(\text{CH}_2)_2\text{CHO}[\text{MPA-(R)}]\text{CH}_2\text{CH}_2(\text{CH}_2)_2(\text{CD}_2)_2(\text{CH}_2)_6\text{OMOM}$   
 $^1\text{H}$  NMR

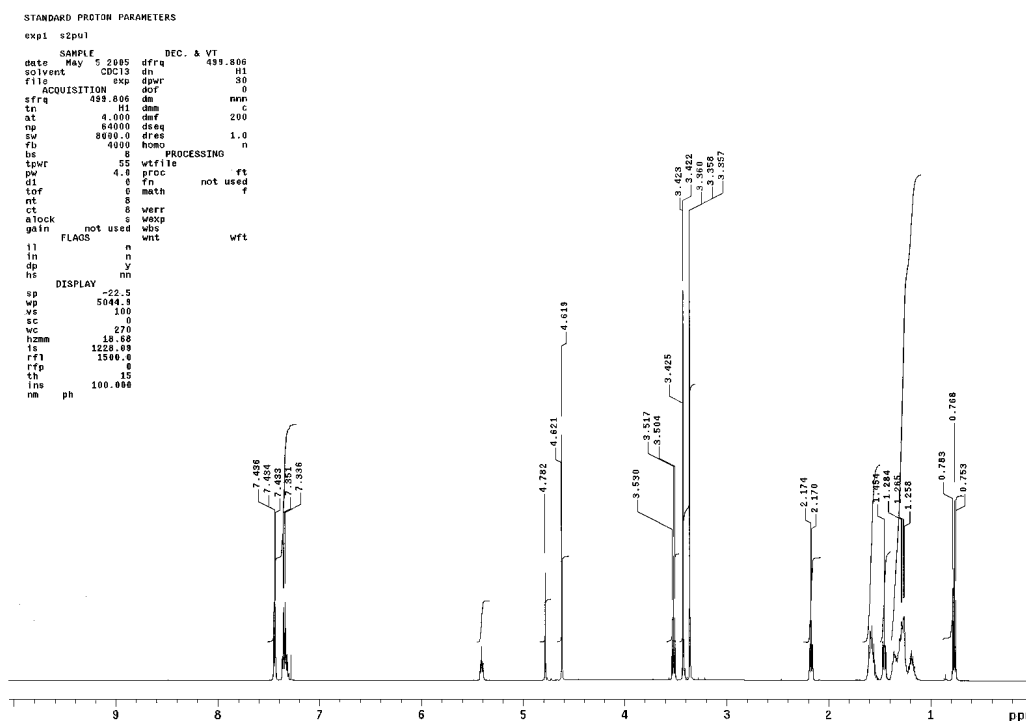

$^{13}\text{C}$  NMR

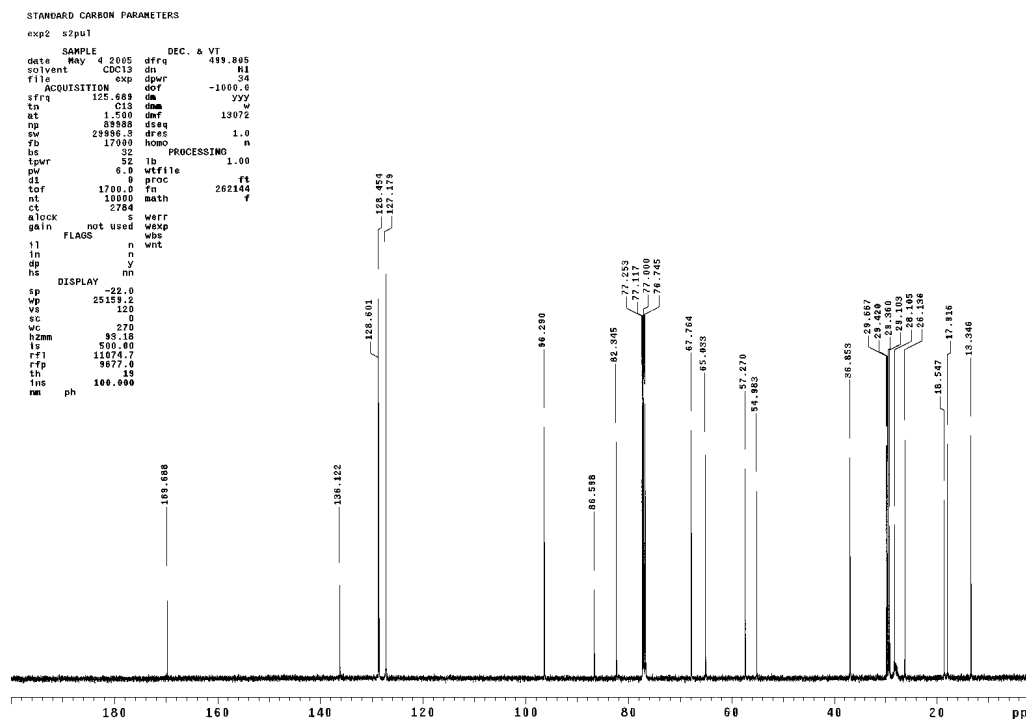

## DEPT 1(CH)

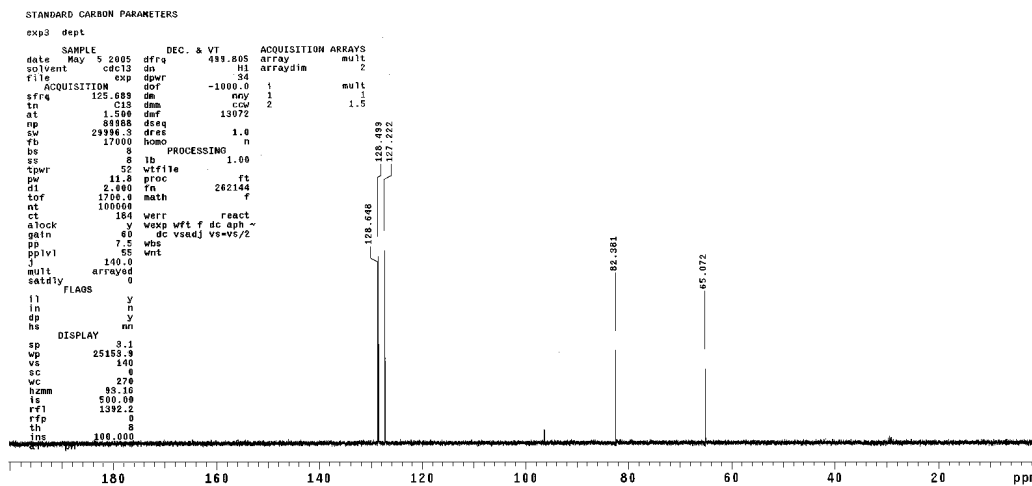DEPT 2 (CH, CH<sub>3</sub>/CH<sub>2</sub>)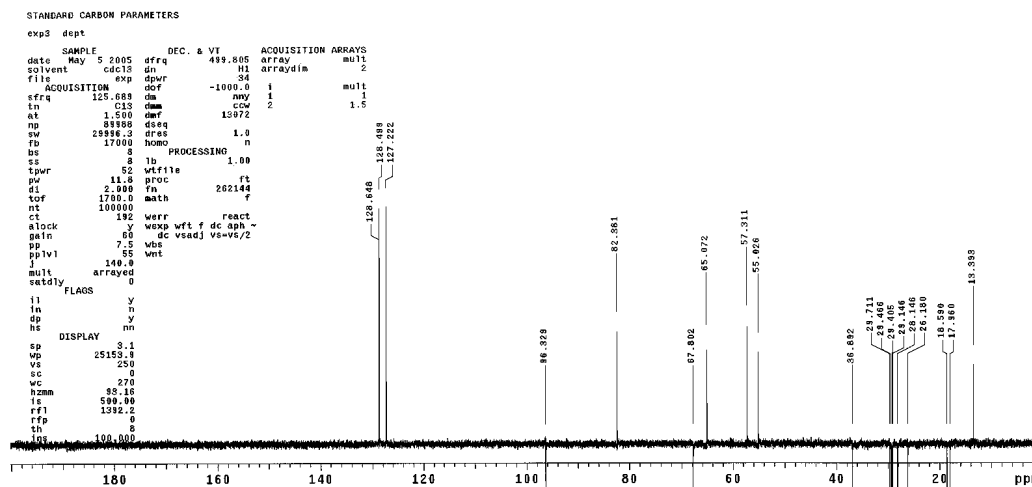

DQCOSY

STANDARD PROTON PARAMETERS

```
exp10 gDQCOSY
SAMPLE
date May 4 2005 hs nn
solvent CDC13 spul y
sample undefined hsglv1 5076
ACQUISITION SPECIAL
sv 3861.4 temp not used
at 0.333 gain 14
mp 2574 spn 0
fb 2000 F2 PROCESSING
ss 32 sb -0.250
d1 1.167 sbs -0.167
nt 4 lsfid -12
2D ACQUISITION PROC 1p
sw1 3861.4 F1 PROCESSING
nl 386 F1
TRANSMITTER sb1
tn H1 sbu1 -0.150
sfrq 499.866 proc1 1p
tof -464.3 fn1 4096
tpr 55 DISPLAY
pw 7.650 sp 288.2
GRADIENTS wp 3419.4
g2lv11 3250 sp1 305.2
g11 0.002500 wp1 3493.7
g2lv12 6500 rf1 -156.2
g12 0.002500 rfp 0
gstab 0.000500 rf11 -156.2
DECOUPLER rfp1 0
dn H1 PLOT
dm nnn wc 160.0
sc 6.8
wc2 160.0
vs 0
th 162
al ph 0
```

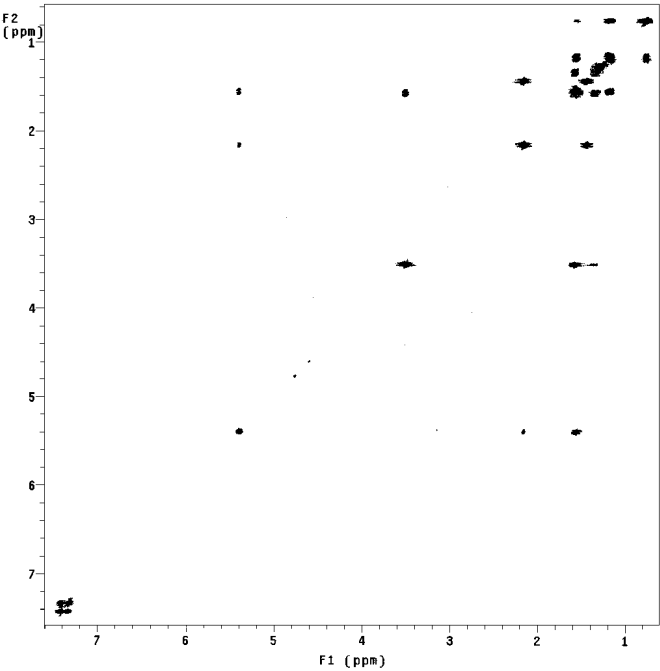

HSQC

STANDARD PROTON PARAMETERS

```
Pulse Sequence: gHSQC
Solvent: CDC13
Ambient temperature
INDVA-500 "trans500"
Relax. delay 1.200 sec
Acq. time 0.350 sec
Width 3786.8 Hz
2D Width 14517.0 Hz
8 repetitions
2 x 256 increments
OBSERVE H1 499.803955 (ppm)
DECOUPLE C13 125.6846885 MHz
Power 46 dB
on during acquisition
off during delay
GARP-1 modulated
DATA PROCESSING
Gauss apodization 0.062 sec
F1 DATA PROCESSING
Gauss apodization 0.011 sec
FT size 1024 x 2048
Total time 1 hr, 45 min, 29 sec
```

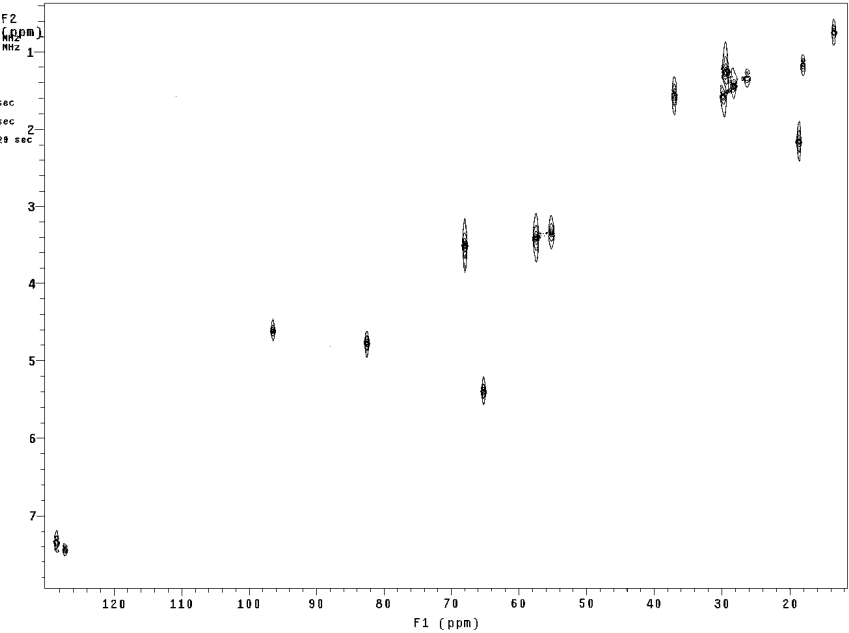

**(R)-14b**  $\text{CH}_3\text{CH}_2\text{CHO}[\text{MPA-(R)}]\text{CH}_2\text{CH}_2\text{CH}_2(\text{CH}_2)_2(\text{CD}_2)_2(\text{CH}_2)_6\text{OMOM}$   
 $^1\text{H}$  NMR

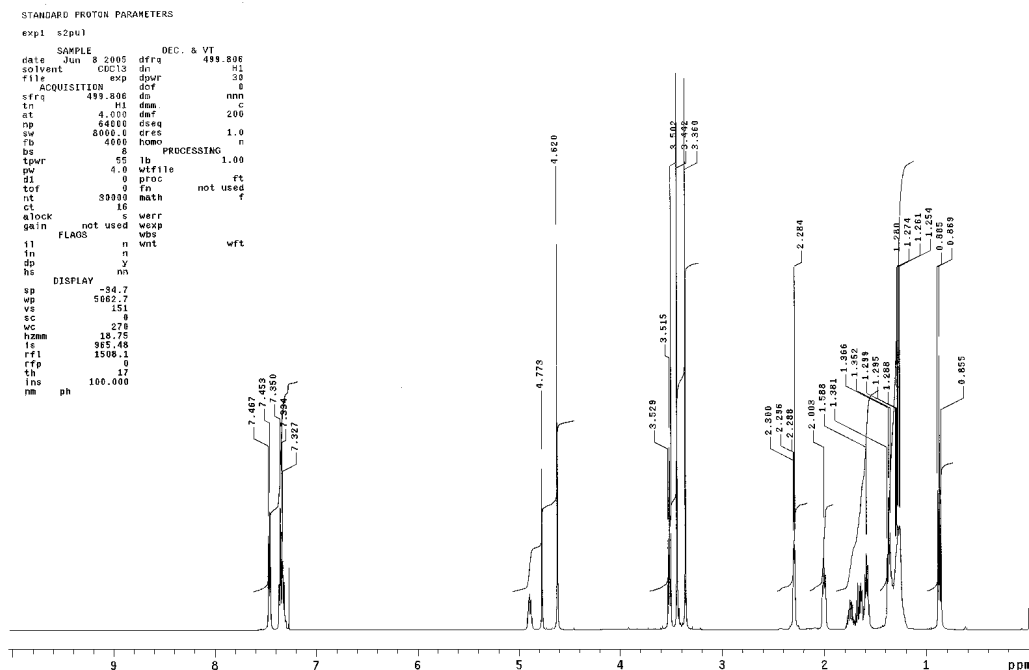

$^{13}\text{C}$  NMR

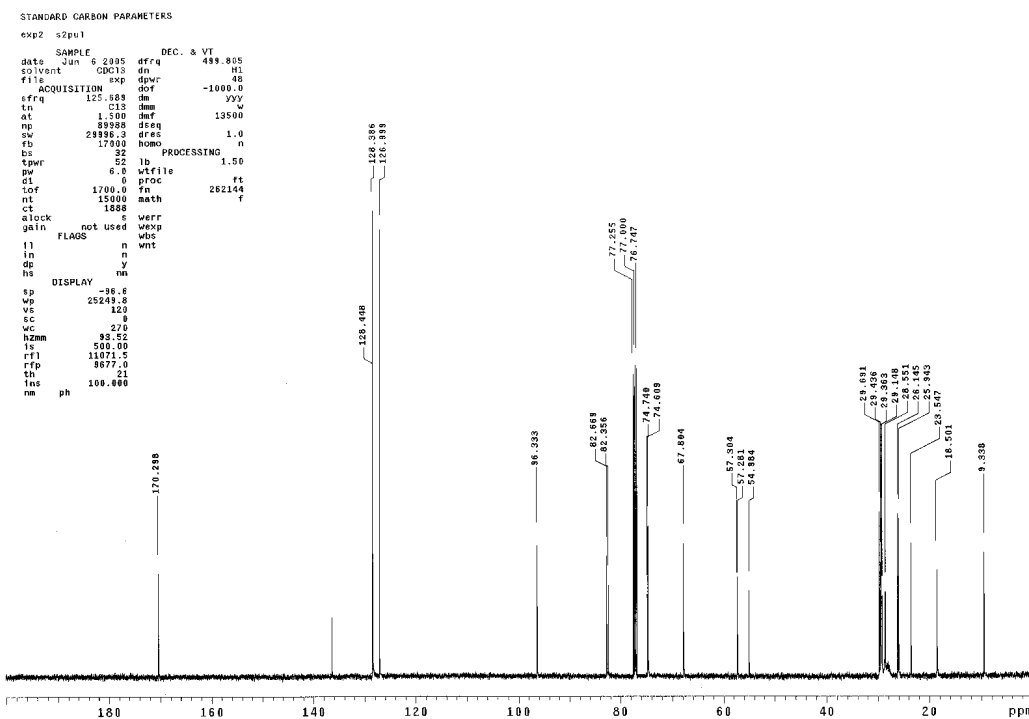

## DEPT 1(CH)

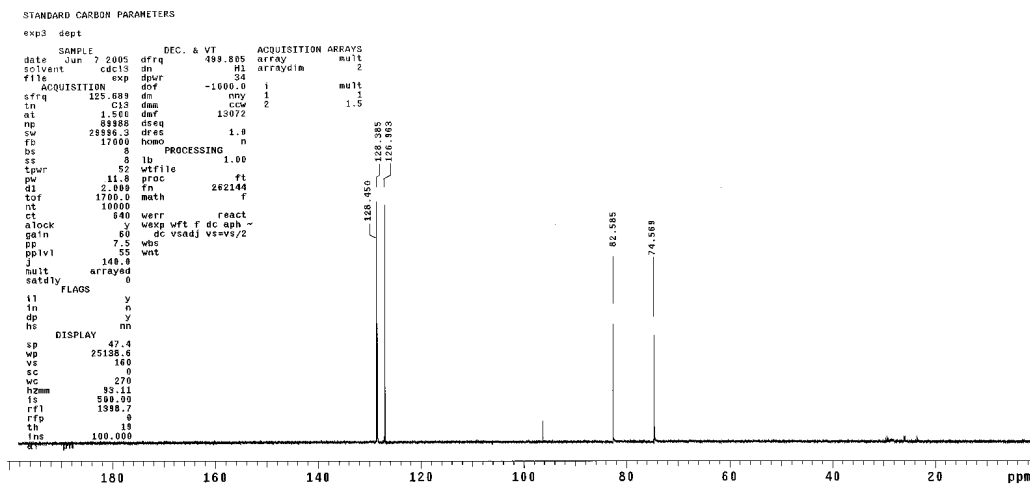DEPT 2 (CH, CH<sub>3</sub>/CH<sub>2</sub>)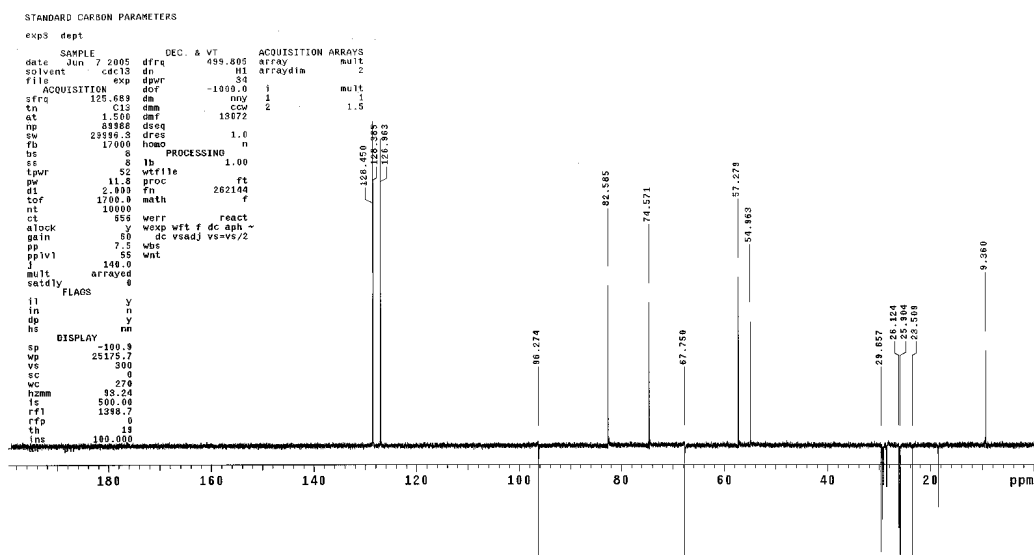



## DQCOSY

## STANDARD PROTON PARAMETERS

```

exp5 gDQCOSY
SAMPLE          FLAGS
date Jun 7 2005 hs nn
solvent CDC13 esp1 y
sample undefined hsglv1 5376
ACQUISITION     SPECIAL not used
sv 3861.4 temp
at 0.323 gain 14
ap 237.4 gain 0
fb 2080 sb F2 PROCESSING
ss 32 sb -0.333
d1 1.167 sbf -0.333
nt 8 tsfid -12
2D ACQUISITION  proc 1p
sv1 3861.4 fn 8192
nt 386 F1 PROCESSING
TRANSMITTER sb1 0.210
tn H1 sb1 -0.210
sfrq 498.806 proc1 1p
tof -404.5 fnl 8192
tpwr 55
pw 7.050 sp 184.4
GRADIENTS      wd 3581.6
gzlv11 8250 sp1 217.4
gzlv12 8.00250 mp1 3482.4
gzlv12 8500 rf1 -158.2
gzlv12 0.00250 rfp 9
gzlv12 0.000590 rf1 -156.2
DECOUPLER      rfp1 0
dn H1
dm nan wc PLOT 160.0
          sc 6.6
          wc2 160.0
          sc2 9
          vs 19
          th 1
          at ph

```

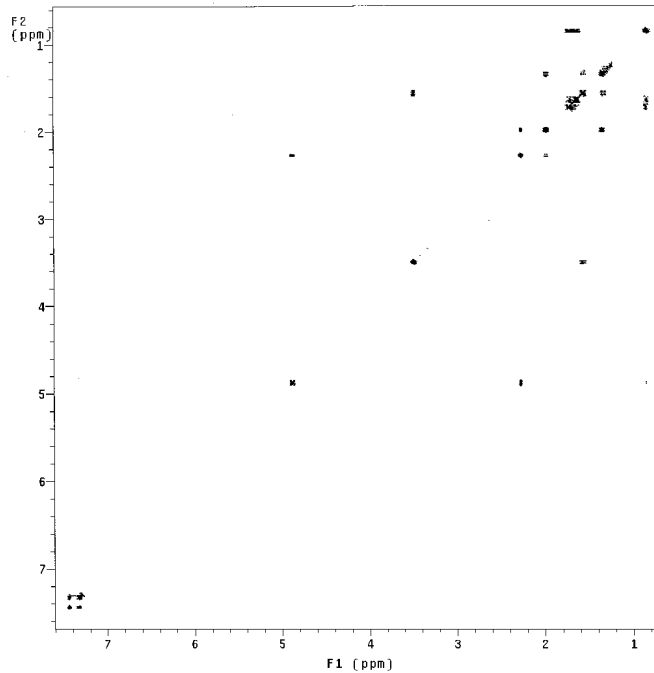

## HSQC

## STANDARD PROTON PARAMETERS

```

Pulse Sequence: gh50c
Solvent: CDC12
Ambient temperature
INOVA-500 "trans500"

```

```

Relax. delay 1.200 sec
Acq. time 0.300 sec
Width 4100.0 Hz
2D Width 15500.9 Hz
2 repetitions
2 x 512 increments
OBSERVE H1 498.803956 MHz
DECOUPLE C13 125.6948895 MHz
Power 45 dB
on during acquisition
off during delay
GAMP-1 modulated
DATA PROCESSING
Sine bell 0.270 sec
Shifted by -0.270 sec
F1 DATA PROCESSING
Sine bell 0.022 sec
Shifted by -0.022 sec
F1 size 2048 x 8192
Total time 3 hr, 37 min, 11 sec

```

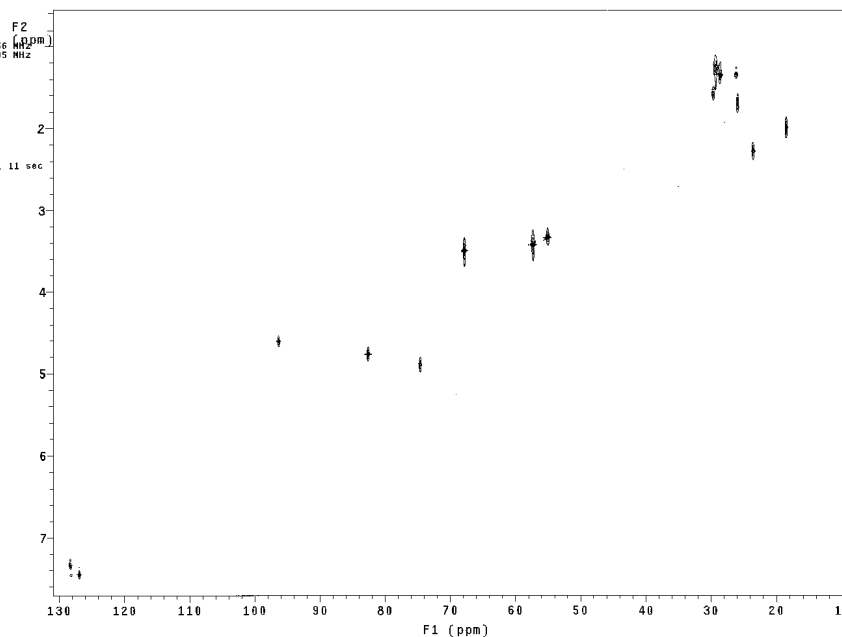

**(S)-14b**  $\text{CH}_3\text{CH}_2\text{CHO}[\text{MPA-(R)}]\text{CH}_2\text{CH}_2\text{CH}_2(\text{CH}_2)_2(\text{CD}_2)_2(\text{CH}_2)_6\text{OMOM}$   
 $^1\text{H}$  NMR

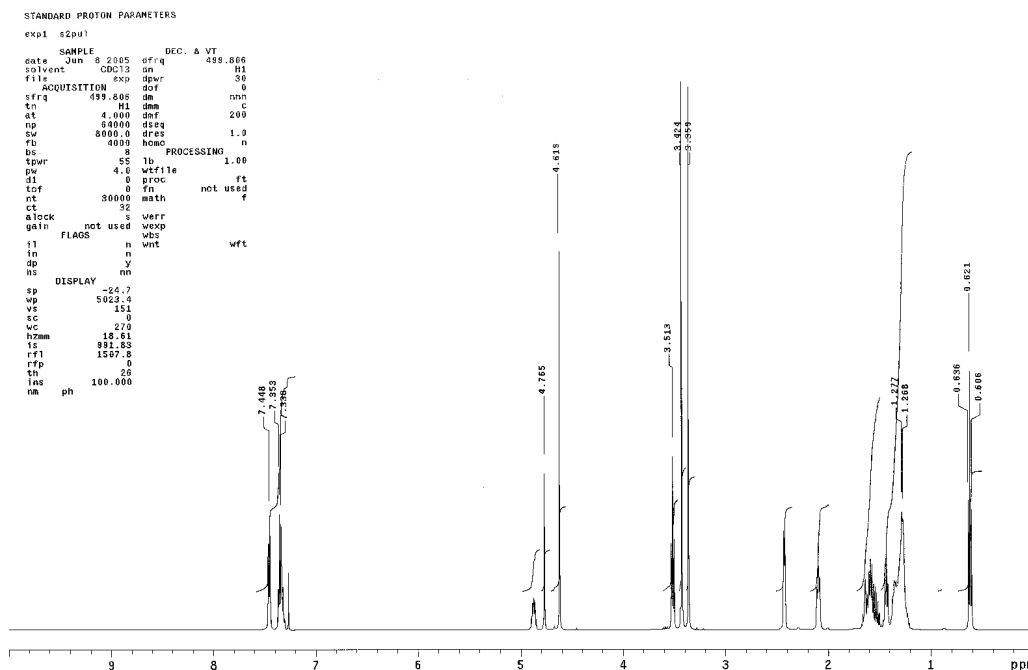

$^{13}\text{C}$  NMR

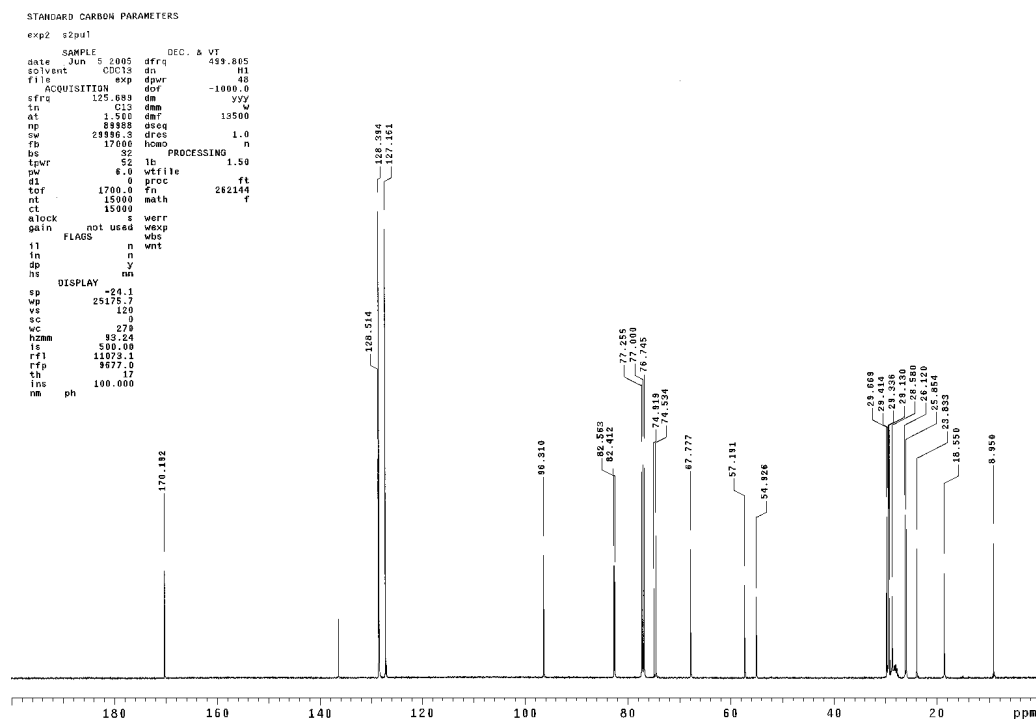

## DEPT 1(CH)

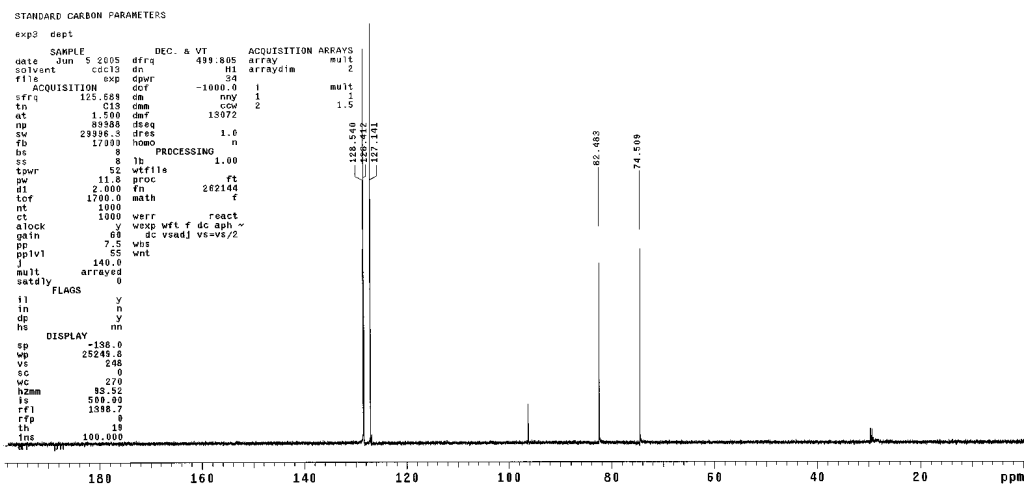DEPT 2 (CH, CH<sub>3</sub>/CH<sub>2</sub>)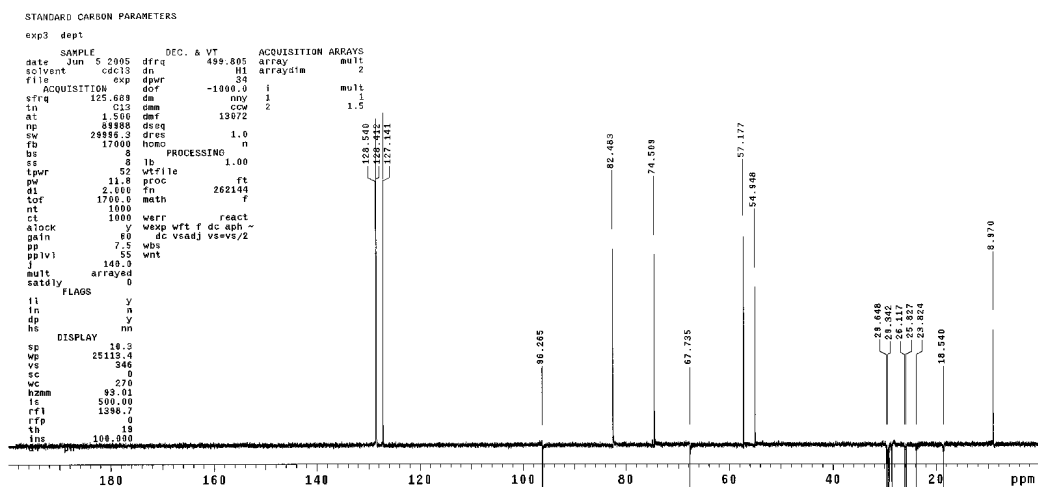

DQCOSY

STANDARD PROTON PARAMETERS  
exp6 gDQCOSY

|                |            |               |            |
|----------------|------------|---------------|------------|
| SAMPLE         |            | FLAOS         |            |
| date           | Jun 5 2005 | hs            | nn         |
| solvent        | CDCl3      | aspl          | y          |
| sample         | undefined  | hsplv1        | S076       |
| ACQUISITION    |            | SPECIAL       |            |
| sw             | 3861.4     | temp          | not used   |
| at             | 0.333      | gain          | 14         |
| np             | 6374       | spin          | 0          |
| fb             | 2000       | F2 PROCESSING |            |
| ss             | 32         | sb            | 0.333      |
| d1             | 1.167      | sbs           | -0.333     |
| nt             | 0          | terfid        | -12        |
| 2D ACQUISITION |            | proc          |            |
| sw1            | 3861.4     | fn            | 0192       |
| nt1            | 356        | f1            | PROCESSING |
| TRANSMITTER    |            | sh1           |            |
| tn             | H1         | shs1          | -0.210     |
| sfrq           | 499.808    | procl         | lp         |
| tof            | -404.3     | tn1           | 0192       |
| tpwr           | 55         | DISPLAY       |            |
| pw             | 7.650      | up            | 171.3      |
| GRADIENTS      |            | wp            |            |
| gziv11         | 3250       | sp1           | 3861.6     |
| g11            | 0.002500   | wp1           | 180.7      |
| gziv12         | 6500       | rf1           | -156.2     |
| g12            | 0.002500   | rfp           | 0          |
| gstab          | 0.000500   | rf11          | -156.2     |
| DECOUPLER      |            | rrp1          |            |
| dn             | H1         | PLOT          |            |
| dm             | nnn        | wc            | 160.0      |
|                |            | sc            | 6.8        |
|                |            | wc2           | 160.0      |
|                |            | sc2           | 0          |
|                |            | vs            | 10         |
|                |            | th            | 1          |
|                | at         | ph            |            |

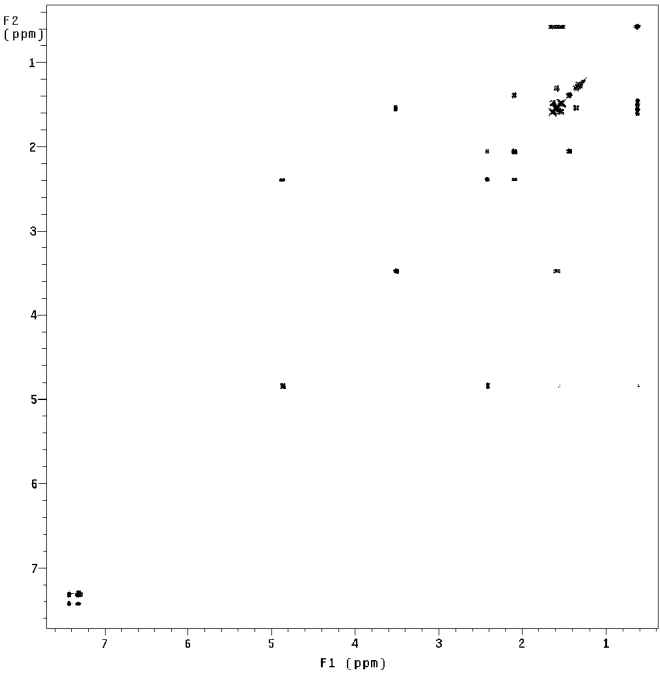

HSQC

STANDARD PROTON PARAMETERS  
Pulse Sequence: gHSQC

Solvent: CDCl3  
Ambient temperature  
INOVA-500 "Hans500"

Relax. delay 1.200 sec  
Acq. time 0.900 sec  
Width 4100.0 Hz  
2D Width 15800.9 Hz  
S repetitions 2  
2 x 512 Increments  
OBSERVE H1, -155.8029356 MHz  
DECOUPLE G13, 125.6846895 MHz  
Power 40 dB  
on during acquisition  
off during delay  
GMS-1 modulated  
DATA PROCESSING  
Sine bell 0.270 sec  
Shifted by -0.270 sec  
F1 DATA PROCESSING  
Sine bell 0.032 sec  
Shifted by -0.032 sec  
F1 size 2048 x 0.182  
Total time 3 hr, 37 min, 11 sec

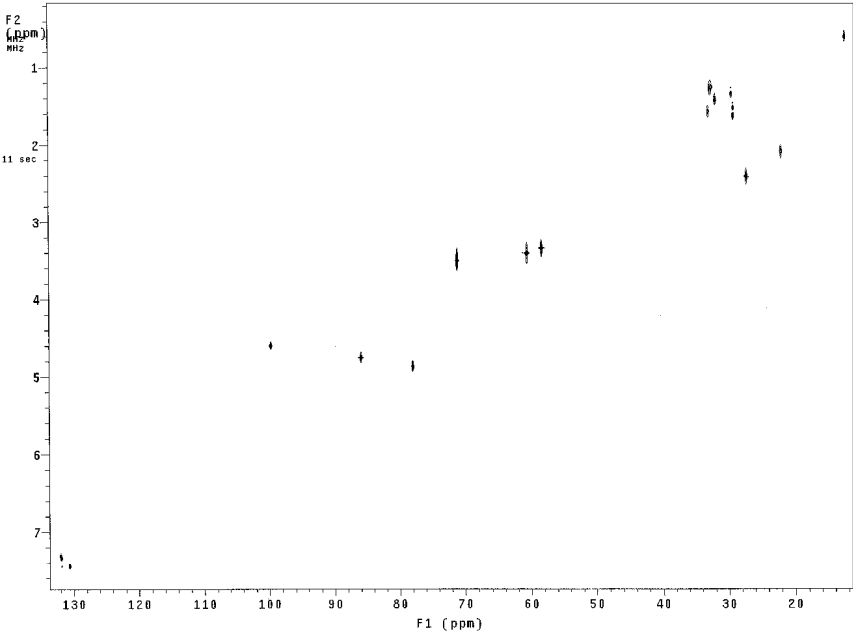

## References

1. Gitlesen, T.; Bauer, M.; Adlercreutz, P., *Lipid Metab.* **1997**, *1345*, 188-196.
2. Abad, J.-L.; Soldevila, C.; Clapès, P.; Camps, F., *J. Org. Chem.* **2003**, *68*, 5351-5356.
3. Abad, J. L.; Serra, M.; Camps, F.; Fabriàs, G., *J. Org. Chem.* **2007**, *72*, 760-764.
4. Abad, J.-L.; Fabriàs, G.; Camps, F., *Lipids* **2004**, *39*, 397-401.
5. Bates, H. A.; Farina, J.; Tong, M., *J. Org. Chem.* **1986**, *51*, 2637-2641.
6. Abad, J.-L.; Fabriàs, G.; Camps, F., *J. Org. Chem.* **2000**, *65*, 8582-8588.
